# Supplementary material
Source: MDPI journal article supplement (https://www.mdpi.com/2071-1050/15/19/14598)
Supplement: s1 [file s1]

# Supplementary S1

GC and MS analysis of nine sets of experiments.

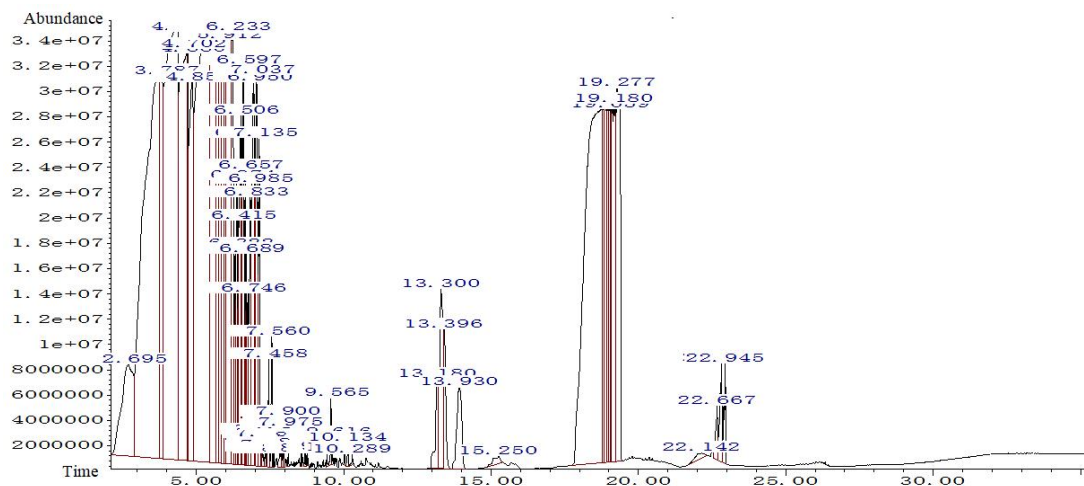

Figure 1 GC analysis of Experimental group 1

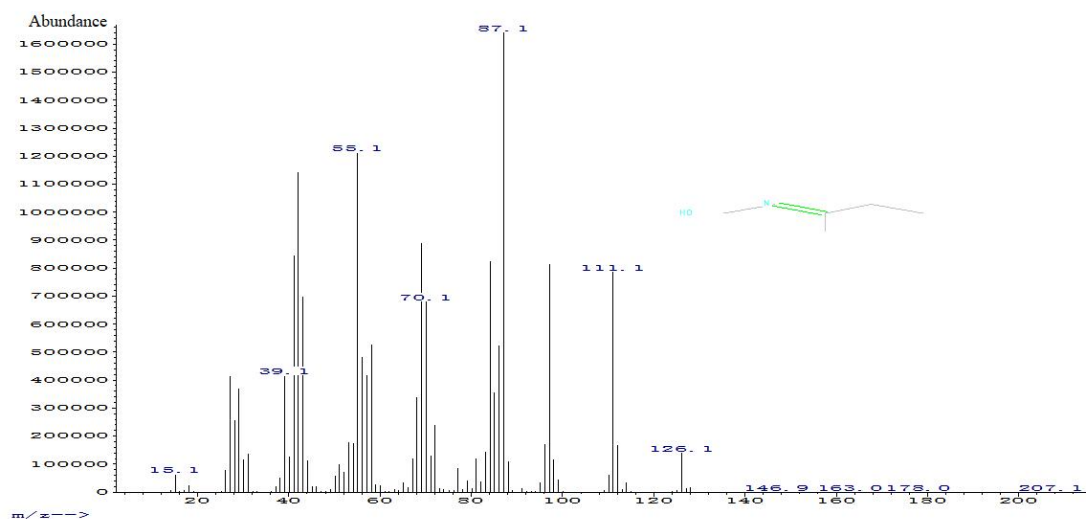

Figure 2 MS of Experimental group 1

| Peak | R.T.  | Area% | Material                   | Reference | CAS         | Mass |
|------|-------|-------|----------------------------|-----------|-------------|------|
| 1    | 2.693 | 1.98  | 2-Pentene, 3-methyl-       | 1466      | 000922-61-2 | 64   |
|      |       |       | 2-Pentene, 3-methyl-, (Z)- | 1506      | 000922-62-3 | 64   |
|      |       |       | 2-Pentene, 3-methyl-, (Z)- | 1508      | 000922-62-3 | 62   |
| 2    | 3.694 | 11.30 | Pyrrolidine                | 606       | 000123-75-1 | 46   |
|      |       |       | Hexane, 3,3,4-trimethyl-   | 12579     | 016747-31-2 | 43   |
|      |       |       | Heptane                    | 3943      | 000142-82-5 | 43   |
| 3    | 3.787 | 2.27  |                            |           |             |      |

|    |       |       |                                    |       |             |    |
|----|-------|-------|------------------------------------|-------|-------------|----|
|    |       |       | Hexane, 3-methyl-                  | 3944  | 000589-34-4 | 59 |
|    |       |       | Heptane                            | 3941  | 000142-82-5 | 53 |
|    |       |       | Hexane, 3,3,4-trimethyl-           | 12579 | 016747-31-2 | 47 |
| 4  | 4.362 | 10.05 |                                    |       |             |    |
|    |       |       | Cycloheptane                       | 3275  | 000291-64-5 | 55 |
|    |       |       | 1-Heptene                          | 3269  | 000592-76-7 | 50 |
|    |       |       | Cyclohexane, methyl-               | 3314  | 000108-87-2 | 46 |
| 5  | 4.660 | 5.68  |                                    |       |             |    |
|    |       |       | Cyclohexane, methyl-               | 3312  | 000108-87-2 | 52 |
|    |       |       | 3-Penten-2-one, 4-methyl-          | 3203  | 000141-79-7 | 43 |
|    |       |       | Cycloheptane                       | 3274  | 000291-64-5 | 43 |
| 6  | 4.701 | 0.77  |                                    |       |             |    |
|    |       |       | Cyclohexane, methyl-               | 3312  | 000108-87-2 | 47 |
|    |       |       | 1-Pentene, 2,3-dimethyl-           | 3333  | 003404-72-6 | 43 |
|    |       |       | Cyclopropane, 1,1,2,3-tetramethyl- | 3383  | 074752-93-5 | 38 |
| 7  | 4.850 | 3.12  |                                    |       |             |    |
|    |       |       | Cyclopentane, 1,3-dimethyl-        | 3364  | 002453-00-1 | 46 |
|    |       |       | 1-Hexene, 4-ethyl-                 | 6593  | 016746-85-3 | 41 |
|    |       |       | Heptane, 2-methyl-                 | 7560  | 000592-27-8 | 38 |
| 8  | 5.378 | 10.28 |                                    |       |             |    |
|    |       |       | Octane, 4-methyl-                  | 12531 | 002216-34-4 | 46 |
|    |       |       | Hexane, 2,3,4-trimethyl-           | 12578 | 000921-47-1 | 43 |
|    |       |       | Heptane, 2-methyl-                 | 7560  | 000592-27-8 | 38 |
| 9  | 5.646 | 4.62  |                                    |       |             |    |
|    |       |       | Octane                             | 7548  | 000111-65-9 | 58 |
|    |       |       | Hexane, 2,3,4-trimethyl-           | 12578 | 000921-47-1 | 58 |
|    |       |       | Heptane, 3-methyl-                 | 7552  | 000589-81-1 | 55 |
| 10 | 5.738 | 1.95  |                                    |       |             |    |
|    |       |       | Hexane, 3-ethyl-                   | 7550  | 000619-99-8 | 52 |
|    |       |       | Heptane, 3,4,5-trimethyl-          | 18959 | 020278-89-1 | 49 |
|    |       |       | Heptane, 3-methyl-                 | 7556  | 000589-81-1 | 49 |
| 11 | 5.815 | 1.89  |                                    |       |             |    |
|    |       |       | Cyclohexane, 1,2-dimethyl-         | 6680  | 000583-57-3 | 76 |
|    |       |       | Cyclohexane, 1,2-dimethyl-, trans- | 6757  | 006876-23-9 | 76 |
|    |       |       | Cyclohexane, 1,2-dimethyl-         | 6671  | 000583-57-3 | 76 |

|    |       |      |                                        |       |                |
|----|-------|------|----------------------------------------|-------|----------------|
| 12 | 5.913 | 1.58 |                                        |       |                |
|    |       |      | Cyclopentane, 1-ethyl-2-methyl-, cis-  | 6763  | 000930-89-2 89 |
|    |       |      | Cyclopentane, 1-ethyl-2-methyl-        | 6730  | 003726-46-3 64 |
|    |       |      | Hexane, 2,3,5-trimethyl-               | 12572 | 001069-53-0 46 |
| 13 | 5.969 | 1.23 |                                        |       |                |
|    |       |      | 1,2-Cyclohexanedione                   | 6312  | 000765-87-7 45 |
|    |       |      | Cyclobutane, 1,2-diethyl-              | 6668  | 061141-83-1 43 |
|    |       |      | Cyclopentane, 1-ethyl-2-methyl-, cis-  | 6763  | 000930-89-2 42 |
| 14 | 6.118 | 3.70 |                                        |       |                |
|    |       |      | Heptane, 2,4-dimethyl-                 | 12548 | 002213-23-2 58 |
|    |       |      | Pentane, 3-ethyl-2-methyl-             | 7595  | 000609-26-7 58 |
|    |       |      | Hexane, 3,3-dimethyl-                  | 7562  | 000563-16-6 50 |
| 15 | 6.231 | 1.85 |                                        |       |                |
|    |       |      | Octane                                 | 7548  | 000111-65-9 86 |
|    |       |      | Heptane, 2,3-dimethyl-                 | 12558 | 003074-71-3 52 |
|    |       |      | Pentane, 3-ethyl-2-methyl-             | 7595  | 000609-26-7 52 |
| 16 | 6.323 | 0.46 |                                        |       |                |
|    |       |      | Heptane, 5-ethyl-2,2,3-trimethyl-      | 37516 | 062199-06-8 53 |
|    |       |      | Hexane, 2,2,3-trimethyl-               | 12587 | 016747-25-4 47 |
|    |       |      | Pentane, 2,2,3,4-tetramethyl-          | 12597 | 001186-53-4 43 |
| 17 | 6.375 | 0.60 |                                        |       |                |
|    |       |      | Heptane, 2,3-dimethyl-                 | 12547 | 003074-71-3 58 |
|    |       |      | Heptane, 2,4-dimethyl-                 | 12559 | 002213-23-2 53 |
|    |       |      | Heptane, 2,4-dimethyl-                 | 12548 | 002213-23-2 53 |
| 18 | 6.416 | 0.36 |                                        |       |                |
|    |       |      | 1-Octene                               | 6558  | 000111-66-0 45 |
|    |       |      | Cyclopentane, 1-ethyl-2-methyl-, cis-  | 6763  | 000930-89-2 43 |
|    |       |      | 1-Ethyl-2-(4-methylpentyl)cyclopentane | 46131 | 219726-60-0 43 |
| 19 | 6.508 | 1.25 |                                        |       |                |
|    |       |      | Cyclooctane                            | 6564  | 000292-64-8 42 |
|    |       |      | Caprolactam                            | 6857  | 000105-60-2 30 |
|    |       |      | Cyclohexanone, 4-hydroxy-4-methyl-     | 12149 | 017429-02-6 25 |
| 20 | 6.539 | 0.51 |                                        |       |                |
|    |       |      | Cyclopentane, propyl-                  | 6632  | 002040-96-2 49 |
|    |       |      | Cyclooctane                            | 6564  | 000292-64-8 42 |
|    |       |      | 3-Octene, (E)-                         | 6574  | 014919-01-8 38 |

|    |       |      |                               |       |                 |
|----|-------|------|-------------------------------|-------|-----------------|
| 21 | 6.596 | 1.15 |                               |       |                 |
|    |       |      | 3-Ethylcyclopentanone         | 6435  | 010264-55-8 38  |
|    |       |      | Heptane, 2,5-dimethyl-        | 12564 | 002216-30-0 35  |
|    |       |      | Cyclohexane, ethyl-           | 6602  | 001678-91-7 30  |
| 22 | 6.657 | 0.46 |                               |       |                 |
|    |       |      | Cyclohexane, 1,1,3-trimethyl- | 11475 | 003073-66-3 64  |
|    |       |      | Cyclohexane, 1,1,3-trimethyl- | 11476 | 003073-66-3 58  |
|    |       |      | Cyclohexane, 1,1,3-trimethyl- | 11460 | 003073-66-3 52  |
| 23 | 6.688 | 0.28 |                               |       |                 |
|    |       |      | 2-Butanone, oxime             | 1864  | 000096-29-7 46  |
|    |       |      | 2-Butanone, oxime             | 1865  | 000096-29-7 46  |
|    |       |      | 2-Butanone, oxime             | 1863  | 000096-29-7 46  |
| 24 | 6.744 | 0.38 |                               |       |                 |
|    |       |      | 2-Butanone, oxime             | 1863  | 000096-29-7 93  |
|    |       |      | 2-Butanone, oxime             | 1865  | 000096-29-7 86  |
|    |       |      | 2-Butanone, oxime             | 1864  | 000096-29-7 64  |
| 25 | 6.832 | 0.83 |                               |       |                 |
|    |       |      | 2-Butanone, oxime             | 1864  | 000096-29-7 60  |
|    |       |      | 2-Butanone, oxime             | 1865  | 000096-29-7 60  |
|    |       |      | 2-Hexanone, O-methyloxime     | 12817 | 1000002-79-6 32 |
| 26 | 6.950 | 1.80 |                               |       |                 |
|    |       |      | Benzene, 1,3-dimethyl-        | 5055  | 000108-38-3 25  |
|    |       |      | Ethylbenzene                  | 5042  | 000100-41-4 25  |
|    |       |      | Ethylbenzene                  | 5043  | 000100-41-4 25  |
| 27 | 6.986 | 0.29 |                               |       |                 |
|    |       |      | 2-Butanone, oxime             | 1864  | 000096-29-7 78  |
|    |       |      | 2-Butanone, oxime             | 1865  | 000096-29-7 60  |
|    |       |      | 2-Butanone, oxime             | 1863  | 000096-29-7 53  |
| 28 | 7.037 | 1.51 |                               |       |                 |
|    |       |      | 2-Butanone, oxime             | 1865  | 000096-29-7 42  |
|    |       |      | 2-Butanone, oxime             | 1864  | 000096-29-7 27  |
|    |       |      | 2,6-Piperazinedione, dioxime  | 20224 | 035975-29-2 25  |
| 29 | 7.135 | 0.80 |                               |       |                 |
|    |       |      | p-Xylene                      | 5030  | 000106-42-3 92  |
|    |       |      | o-Xylene                      | 5039  | 000095-47-6 92  |

|    |       |                                                             |       |              |    |
|----|-------|-------------------------------------------------------------|-------|--------------|----|
|    |       | p-Xylene                                                    | 5032  | 000106-42-3  | 92 |
| 30 | 7.212 | 0.04                                                        |       |              |    |
|    |       | 1,7-Octadiene, 2,3,3-trimethyl-                             | 25014 | 1000150-47-7 | 53 |
|    |       | Cyclohexane, ethyl-                                         | 6602  | 001678-91-7  | 50 |
|    |       | Oxalic acid, cyclohexyl pentyl ester                        | 91473 | 1000309-30-6 | 43 |
| 31 | 7.237 | 0.05                                                        |       |              |    |
|    |       | Bicyclo[3.1.0]hexan-3-one                                   | 2792  | 001755-04-0  | 46 |
|    |       | Cyclohexane, 1,2,3-trimethyl-, (1.alpha.,2.beta.,3.alpha.)- | 11511 | 001678-81-5  | 42 |
|    |       | Cyclohexane, 1,2,4-trimethyl-                               | 11470 | 002234-75-5  | 42 |
| 32 | 7.330 | 0.03                                                        |       |              |    |
|    |       | Cyclopentane, 1-methyl-2-propyl-                            | 11484 | 003728-57-2  | 90 |
|    |       | 3-Nonene, (E)-                                              | 11389 | 020063-92-7  | 58 |
|    |       | Cyclohexane, 1,2,3-trimethyl-                               | 11461 | 001678-97-3  | 52 |
| 33 | 7.392 | 0.02                                                        |       |              |    |
|    |       | cis-1-Ethyl-3-methyl-cyclohexane                            | 11486 | 019489-10-2  | 92 |
|    |       | 1-Ethyl-3-methylcyclohexane (c,t)                           | 11488 | 003728-55-0  | 91 |
|    |       | 1-Ethyl-4-methylcyclohexane                                 | 11451 | 003728-56-1  | 64 |
| 34 | 7.458 | 0.18                                                        |       |              |    |
|    |       | p-Xylene                                                    | 5033  | 000106-42-3  | 95 |
|    |       | Benzene, 1,3-dimethyl-                                      | 5055  | 000108-38-3  | 95 |
|    |       | p-Xylene                                                    | 5032  | 000106-42-3  | 95 |
| 35 | 7.561 | 0.23                                                        |       |              |    |
|    |       | Nonane                                                      | 12526 | 000111-84-2  | 95 |
|    |       | Nonane                                                      | 12527 | 000111-84-2  | 95 |
|    |       | Nonane                                                      | 12528 | 000111-84-2  | 83 |
| 36 | 7.623 | 0.01                                                        |       |              |    |
|    |       | Cyclopentanone, 2-(1-methylpropyl)                          | 18536 | 006376-92-7  | 27 |
|    |       | 1-Methoxy-4,4-dimethyl-cyclohex-1-ene                       | 18548 | 073741-65-8  | 25 |
|    |       | 2-Octen-4-one                                               | 11202 | 004643-27-0  | 22 |
| 37 | 7.849 | 0.07                                                        |       |              |    |
|    |       | Cyclopentane, 1,2,3,4,5-pentamethyl-                        | 17833 | 1000152-79-7 | 64 |
|    |       | 3,6,6-Trimethyl-cyclohex-2-enol                             | 18506 | 073741-62-5  | 50 |
|    |       | 2H-Pyran, 3,4-dihydro-                                      | 1415  | 000110-87-2  | 47 |
| 38 | 7.900 | 0.08                                                        |       |              |    |

|    |       |      |                                                      |        |              |    |
|----|-------|------|------------------------------------------------------|--------|--------------|----|
|    |       |      | Cyclohexane, 1-methyl-4-(1-methyl-<br>thyl)-, trans- | 17856  | 001678-82-6  | 58 |
|    |       |      | Ethanone, 1-(1-methylcyclohexyl)-                    | 18517  | 002890-62-2  | 53 |
|    |       |      | Sulfurous acid, cyclohexylmethyl i<br>sohexyl ester  | 106953 | 1000309-21-5 | 53 |
| 39 | 7.977 | 0.06 |                                                      |        |              |    |
|    |       |      | Cyclopentane, 1,2,3,4,5-pentamethyl-                 | 17833  | 1000152-79-7 | 72 |
|    |       |      | 1-Methoxy-4,4-dimethyl-cyclohex-1- ene               | 18548  | 073741-65-8  | 38 |
|    |       |      | 2-Cyclohexen-1-ol, 2,4,4-trimethyl                   | 18535  | 073741-61-4  | 38 |
| 40 | 8.121 | 0.02 |                                                      |        |              |    |
|    |       |      | Octane, 2,6-dimethyl-                                | 18952  | 002051-30-1  | 93 |
|    |       |      | Octane, 2,6-dimethyl-                                | 18948  | 002051-30-1  | 91 |
|    |       |      | Octane, 2,6-dimethyl-                                | 18936  | 002051-30-1  | 90 |
| 41 | 8.568 | 0.03 |                                                      |        |              |    |
|    |       |      | 2H-Pyran, 3,4-dihydro-4-methyl-                      | 3240   | 002270-61-3  | 53 |
|    |       |      | 2-Pentene, 4,4-dimethyl-, (Z)-                       | 3373   | 000762-63-0  | 50 |
|    |       |      | 1H-Pyrazole, 3-ethyl-4,5-dihydro-                    | 3036   | 005920-29-6  | 50 |
| 42 | 8.686 | 0.03 |                                                      |        |              |    |
|    |       |      | Octane, 2,3-dimethyl-                                | 18946  | 007146-60-3  | 70 |
|    |       |      | 2-Pentene, 4,4-dimethyl-                             | 3325   | 026232-98-4  | 38 |
|    |       |      | 1H-Imidazole, 4,5-dihydro-2,4-dimethyl-              | 3046   | 000930-61-0  | 38 |
| 43 | 8.752 | 0.01 |                                                      |        |              |    |
|    |       |      | 3-Hexene, 2,3-dimethyl-                              | 6657   | 007145-23-5  | 58 |
|    |       |      | 2,4-Dimethyl-3-hexene(c,t)                           | 6669   | 1000118-16-4 | 50 |
|    |       |      | 3-Hexene, 2,3-dimethyl-                              | 6643   | 007145-23-5  | 49 |
| 44 | 9.430 | 0.02 |                                                      |        |              |    |
|    |       |      | Cyclohexanone, 3,3,5,5-tetramethyl                   | 26315  | 014376-79-5  | 59 |
|    |       |      | 2-Pentene, 4,4-dimethyl-, (E)-                       | 3374   | 000690-08-4  | 58 |
|    |       |      | 2-Pentene, 3,4-dimethyl-, (Z)-                       | 3375   | 004914-91-4  | 53 |
| 45 | 9.564 | 0.09 |                                                      |        |              |    |
|    |       |      | 3-Ethoxy-4-methoxyphenol                             | 36485  | 065383-57-5  | 50 |
|    |       |      | Cyclohexane, 1,1,3,5-tetramethyl-, trans-            | 17843  | 050876-31-8  | 45 |
|    |       |      | 3-Heptene, 2,2,3,5,6-pentamethyl-                    | 36065  | 116164-06-8  | 43 |
| 46 | 9.615 | 0.03 |                                                      |        |              |    |
|    |       |      | cis,cis,cis-1-Isobutyl-2,5-dimethy<br>lcyclohexane   | 36080  | 1000113-60-0 | 81 |

|    |        |      |                                                                             |        |              |    |
|----|--------|------|-----------------------------------------------------------------------------|--------|--------------|----|
|    |        |      | 3-Isopropyl-5-methyl-hex-4-en-2-on                                          | 26309  | 077142-85-9  | 68 |
|    |        |      | Cyclohexane, 1,4-dimethyl-2-(2-methylpropyl)-, (1.alpha.,2.beta.,5.alpha.)- | 36083  | 054411-17-5  | 64 |
| 47 | 10.036 | 0.02 |                                                                             |        |              |    |
|    |        |      | Cyclohexane, 1,1-dimethyl-                                                  | 6676   | 000590-66-9  | 59 |
|    |        |      | Hept-2-ene, 2,4,4,6-tetramethyl-                                            | 26616  | 103982-58-7  | 59 |
|    |        |      | Cyclopentanecarboxylic acid, 4-hexadecyl ester                              | 164250 | 1000282-77-5 | 59 |
| 48 | 10.134 | 0.04 |                                                                             |        |              |    |
|    |        |      | 3-Hexene, 2,3-dimethyl-                                                     | 6643   | 007145-23-5  | 64 |
|    |        |      | 3-Hexene, 2,3-dimethyl-                                                     | 6657   | 007145-23-5  | 59 |
|    |        |      | 3-Ethyl-4-methyl-2-pentene                                                  | 6670   | 019780-68-8  | 38 |
| 49 | 10.288 | 0.02 |                                                                             |        |              |    |
|    |        |      | 2-Pentene, 4-methyl-, (Z)-                                                  | 1510   | 000691-38-3  | 43 |
|    |        |      | cis,cis,cis-1-Isobutyl-2,5-dimethylcyclohexane                              | 36080  | 1000113-60-0 | 41 |
|    |        |      | 1-Pentene, 3-ethyl-2-methyl-                                                | 6709   | 019780-66-6  | 30 |
| 50 | 13.179 | 0.41 |                                                                             |        |              |    |
|    |        |      | Propyl aldoxime, 2-methyl-, anti-                                           | 1892   | 005775-73-5  | 27 |
|    |        |      | Propyl aldoxime, 2-methyl-, syn-                                            | 1891   | 005780-39-2  | 16 |
|    |        |      | Azetidine, n-propyl-                                                        | 3511   |              | 16 |
| 51 | 13.302 | 1.22 |                                                                             |        |              |    |
|    |        |      | Propyl aldoxime, 2-methyl-, anti-                                           | 1892   | 005775-73-5  | 27 |
|    |        |      | 1,3-Cyclobutanedione, 2,2,4,4-tetramethyl-                                  | 18281  | 000933-52-8  | 27 |
|    |        |      | Propyl aldoxime, 2-methyl-, syn-                                            | 1891   | 005780-39-2  | 16 |
| 52 | 13.395 | 0.60 |                                                                             |        |              |    |
|    |        |      | Propyl aldoxime, 2-methyl-, syn-                                            | 1891   | 005780-39-2  | 16 |
|    |        |      | Alanine, N-methyl-n-propoxycarbonyl-, propyl ester                          | 83208  | 1000329-42-9 | 14 |
|    |        |      | Valine, N-methyl-N-methoxycarbonyl-, dodecyl ester                          | 175649 | 1000328-94-0 | 14 |
| 53 | 13.929 | 0.76 |                                                                             |        |              |    |
|    |        |      | Cyclohexanamine, N-methyl-N-nitroso-                                        | 19293  | 005432-28-0  | 38 |
|    |        |      | (S)-(+)-2-(Methoxymethyl)pyrrolidine                                        | 7795   | 063126-47-6  | 9  |
|    |        |      | Cyclohexanamine, N-methyl-                                                  | 6938   | 000100-60-7  | 9  |

|    |        |       |                                               |        |              |    |
|----|--------|-------|-----------------------------------------------|--------|--------------|----|
| 54 | 15.249 | 0.10  |                                               |        |              |    |
|    |        |       | 1-Methoxy-2,3-cis-dimethylaziridine (sin)     | 4101   | 061593-25-7  | 47 |
|    |        |       | Azetidine, 1,1'-methylenebis-                 | 11113  | 038455-24-2  | 47 |
|    |        |       | Azetidine, n-propyl-                          | 3511   |              | 28 |
| 55 | 18.746 | 11.25 |                                               |        |              |    |
|    |        |       | Azetidine, n-propyl-                          | 3511   |              | 16 |
|    |        |       | 1-Methoxy-2,3-cis-dimethylaziridine (sin)     | 4101   | 061593-25-7  | 12 |
|    |        |       | Phosphine oxide, methyl diphenyl-             | 71649  | 002129-89-7  | 12 |
| 56 | 18.807 | 1.01  |                                               |        |              |    |
|    |        |       | Decyl alcohol, tert-butyl dimethylsilyl ether | 115281 | 1000333-00-5 | 22 |
|    |        |       | Azetidine, n-propyl-                          | 3511   |              | 16 |
|    |        |       | 1-Methoxy-2,3-cis-dimethylaziridine (sin)     | 4101   | 061593-25-7  | 12 |
| 57 | 18.864 | 1.38  |                                               |        |              |    |
|    |        |       | Decyl alcohol, tert-butyl dimethylsilyl ether | 115281 | 1000333-00-5 | 22 |
|    |        |       | Azetidine, n-propyl-                          | 3511   |              | 16 |
|    |        |       | 1-Methoxy-2,3-cis-dimethylaziridine (sin)     | 4101   | 061593-25-7  | 12 |
| 58 | 18.951 | 1.39  |                                               |        |              |    |
|    |        |       | Decyl alcohol, tert-butyl dimethylsilyl ether | 115281 | 1000333-00-5 | 22 |
|    |        |       | Azetidine, n-propyl-                          | 3511   |              | 16 |
|    |        |       | 1-Methoxy-2,3-cis-dimethylaziridine (sin)     | 4101   | 061593-25-7  | 12 |
| 59 | 19.038 | 0.95  |                                               |        |              |    |
|    |        |       | Azetidine, n-propyl-                          | 3511   |              | 25 |
|    |        |       | 1-Methoxy-2,3-cis-dimethylaziridine (sin)     | 4101   | 061593-25-7  | 17 |
|    |        |       | Decyl alcohol, tert-butyl dimethylsilyl ether | 115281 | 1000333-00-5 | 14 |
| 60 | 19.059 | 0.64  |                                               |        |              |    |
|    |        |       | Azetidine, n-propyl-                          | 3511   |              | 25 |
|    |        |       | 1-Methoxy-2,3-cis-dimethylaziridine (sin)     | 4101   | 061593-25-7  | 17 |
|    |        |       | Decyl alcohol, tert-butyl dimethylsilyl ether | 115281 | 1000333-00-5 | 14 |
| 61 | 19.182 | 2.51  |                                               |        |              |    |
|    |        |       | Azetidine, n-propyl-                          | 3511   |              | 25 |
|    |        |       | Decyl alcohol, tert-butyl dimethylsilyl ether | 115281 | 1000333-00-5 | 14 |



|    |        |                                                                                              |        |              |    |
|----|--------|----------------------------------------------------------------------------------------------|--------|--------------|----|
|    |        | (S)-(+)-2-Pyrrolidinemethanol                                                                | 4078   | 023356-96-9  | 10 |
| 62 | 19.275 | 2.78                                                                                         |        |              |    |
|    |        | Decyl alcohol, tert-butyldimethylsilyl ether                                                 | 115281 | 1000333-00-5 | 22 |
|    |        | Azetidine, n-propyl-                                                                         | 3511   |              | 16 |
|    |        | 1-Methoxy-2,3-cis-dimethylaziridine(sin)                                                     | 4101   | 061593-25-7  | 12 |
| 63 | 22.140 | 0.10                                                                                         |        |              |    |
|    |        | 1-Methoxy-2,3-cis-dimethylaziridine (sin)                                                    | 4101   | 061593-25-7  | 25 |
|    |        | 2H-Pyran-2,4(3H)-dione, dihydro-3,3,5,5-tetramethyl-6-(2-fluorophenyl)-                      | 108553 | 1000277-11-0 | 14 |
|    |        | 2,4-Dinitro-11-phenyl-5H-dibenzo[b,E][1,4]diazepine                                          | 177244 | 071354-26-2  | 12 |
| 64 | 22.669 | 0.19                                                                                         |        |              |    |
|    |        | 3-Amino-6-nitro-4-phenylsulfanylbenzo[b]thiophene-2-carboxylic acid methyl ester             | 177075 | 1000275-36-3 | 50 |
|    |        | Thianthrene, octafluoro-                                                                     | 176996 | 016012-83-2  | 25 |
|    |        | 2-Quinolinecarboxylic acid, 4-[(tert-butyldimethylsilyl)oxy]-, tert-butyldimethylsilyl ester | 200507 | 1000221-71-1 | 23 |
| 65 | 22.813 | 0.37                                                                                         |        |              |    |
|    |        | Thianthrene, octafluoro-                                                                     | 176996 | 016012-83-2  | 25 |
|    |        | 2-Quinolinecarboxylic acid, 4-[(tert-butyldimethylsilyl)oxy]-, tert-butyldimethylsilyl ester | 200507 | 1000221-71-1 | 23 |
|    |        | 6,7-Dimethyl-2-(4-prop-2-ynyloxybenzylidene)-benzo[4,5]imidazo[2,1-b]thiazol-3-one           | 177375 | 1000296-51-8 | 9  |
| 66 | 22.946 | 0.28                                                                                         |        |              |    |
|    |        | Thianthrene, octafluoro-                                                                     | 176996 | 016012-83-2  | 25 |
|    |        | 2-Quinolinecarboxylic acid, 4-[(tert-butyldimethylsilyl)oxy]-, tert-butyldimethylsilyl ester | 200507 | 1000221-71-1 | 23 |
|    |        | Cyanobromodihydro-homolycorine                                                               | 201606 | 1000111-29-7 | 10 |

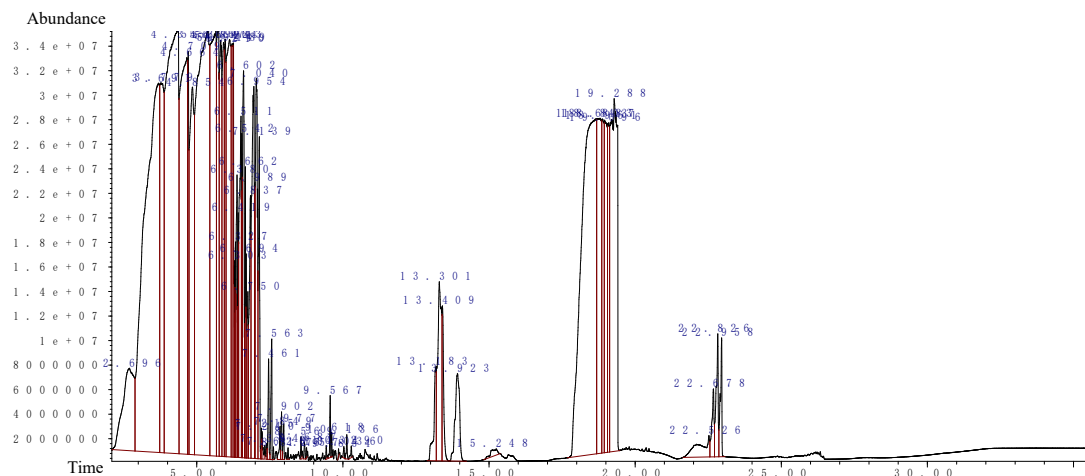

Figure 3 GC analysis of Experimental group 2

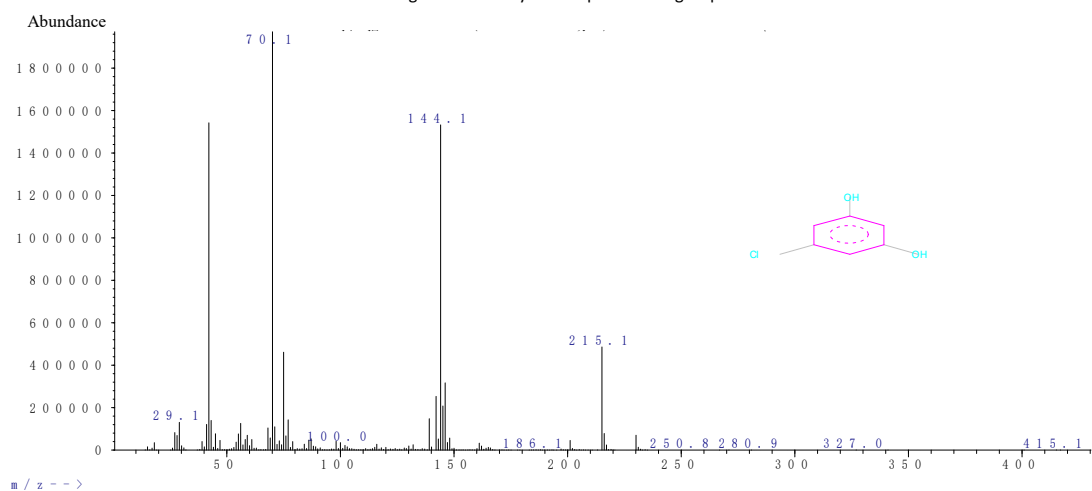

Figure 4 MS of Experimental group 2

| Peak | R.T.        | Area% | Material                   | Reference | CAS         | Mass |
|------|-------------|-------|----------------------------|-----------|-------------|------|
| 1    | 2.698       | 1.83  | 2-Pentene, 3-methyl-, (Z)- | 1508      | 000922-62-3 | 70   |
|      |             |       | 2-Pentene, 3-methyl-, (Z)- | 1506      | 000922-62-3 | 64   |
|      |             |       | 2-Pentene, 3-methyl-       | 1466      | 000922-61-2 | 64   |
|      |             |       |                            |           |             |      |
| 2    | 3.689 10.56 |       | Pentane, 2,3-dimethyl-     | 3962      | 000565-59-3 | 49   |
|      |             |       | 2-Propen-1-amine, N-ethyl- | 1578      | 002424-02-4 | 38   |
|      |             |       | Butane, 2,2-dimethyl-      | 1826      | 000075-83-2 | 38   |
| 3    | 3.781 2.77  |       | Hexane, 3-methyl-          | 3944      | 000589-34-4 | 59   |
|      |             |       | Heptane                    | 3941      | 000142-82-5 | 53   |
|      |             |       | Hexane, 3,3,4-trimethyl-   | 12579     | 016747-31-2 | 47   |
| 4    | 4.346 10.05 |       |                            |           |             |      |

|    |       |       |                                       |       |             |    |
|----|-------|-------|---------------------------------------|-------|-------------|----|
|    |       |       | Cycloheptane                          | 3275  | 000291-64-5 | 64 |
|    |       |       | 1-Heptene                             | 3269  | 000592-76-7 | 46 |
|    |       |       | Cyclohexane, methyl-                  | 3314  | 000108-87-2 | 43 |
| 5  | 4.665 | 5.58  |                                       |       |             |    |
|    |       |       | Cyclohexane, methyl-                  | 3312  | 000108-87-2 | 52 |
|    |       |       | Cycloheptane                          | 3274  | 000291-64-5 | 43 |
|    |       |       | 2-Pentene, 2,3-dimethyl-              | 3323  | 010574-37-5 | 43 |
| 6  | 4.711 | 0.87  |                                       |       |             |    |
|    |       |       | Cyclohexane, methyl-                  | 3312  | 000108-87-2 | 47 |
|    |       |       | 1-Pentene, 2,3-dimethyl-              | 3333  | 003404-72-6 | 43 |
|    |       |       | Cyclopropane, 1,1,2,3-tetramethyl-    | 3383  | 074752-93-5 | 38 |
| 7  | 4.855 | 3.19  |                                       |       |             |    |
|    |       |       | Cyclopentane, 1,3-dimethyl-           | 3364  | 002453-00-1 | 46 |
|    |       |       | 1-Hexene, 4-ethyl-                    | 6593  | 016746-85-3 | 41 |
|    |       |       | Hexane, 2,3,4-trimethyl-              | 12578 | 000921-47-1 | 38 |
| 8  | 5.379 | 10.25 |                                       |       |             |    |
|    |       |       | Octane, 4-methyl-                     | 12531 | 002216-34-4 | 46 |
|    |       |       | Hexane, 2,3,4-trimethyl-              | 12578 | 000921-47-1 | 43 |
|    |       |       | Heptane, 2-methyl-                    | 7560  | 000592-27-8 | 38 |
| 9  | 5.656 | 4.68  |                                       |       |             |    |
|    |       |       | Octane                                | 7548  | 000111-65-9 | 62 |
|    |       |       | Heptane, 3-methyl-                    | 7552  | 000589-81-1 | 55 |
|    |       |       | Octane                                | 7546  | 000111-65-9 | 46 |
| 10 | 5.743 | 1.95  |                                       |       |             |    |
|    |       |       | Heptane, 3,4,5-trimethyl-             | 18959 | 020278-89-1 | 49 |
|    |       |       | Heptane, 3-methyl-                    | 7556  | 000589-81-1 | 49 |
|    |       |       | Cyclobutane, 1,2-diethyl-, trans-     | 6747  | 019341-98-1 | 38 |
| 11 | 5.820 | 1.89  |                                       |       |             |    |
|    |       |       | Cyclohexane, 1,2-dimethyl-, trans-    | 6752  | 006876-23-9 | 89 |
|    |       |       | Cyclohexane, 1,2-dimethyl-, trans-    | 6757  | 006876-23-9 | 76 |
|    |       |       | Cyclohexane, 1,2-dimethyl-            | 6671  | 000583-57-3 | 76 |
| 12 | 5.918 | 1.62  |                                       |       |             |    |
|    |       |       | Cyclopentane, 1-ethyl-2-methyl-, cis- | 6763  | 000930-89-2 | 90 |
|    |       |       | Cyclopentane, 1-ethyl-2-methyl-       | 6730  | 003726-46-3 | 86 |
|    |       |       | Cyclopentane, 1-ethyl-2-methyl-, cis- | 6761  | 000930-89-2 | 86 |

|    |       |      |                                        |       |                 |
|----|-------|------|----------------------------------------|-------|-----------------|
| 13 | 5.974 | 1.15 |                                        |       |                 |
|    |       |      | Cyclopentane, 1-ethyl-2-methyl-        | 6730  | 003726-46-3 46  |
|    |       |      | 1,2-Cyclohexanedione                   | 6312  | 000765-87-7 45  |
|    |       |      | Cyclobutane, 1,2-diethyl-              | 6668  | 061141-83-1 43  |
| 14 | 6.123 | 3.59 |                                        |       |                 |
|    |       |      | Octane                                 | 7548  | 000111-65-9 83  |
|    |       |      | Pentane, 3-ethyl-2-methyl-             | 7595  | 000609-26-7 58  |
|    |       |      | Heptane, 2,4-dimethyl-                 | 12548 | 002213-23-2 53  |
| 15 | 6.210 | 1.31 |                                        |       |                 |
|    |       |      | Octane                                 | 7548  | 000111-65-9 87  |
|    |       |      | Hexane, 3,3-dimethyl-                  | 7562  | 000563-16-6 53  |
|    |       |      | Heptane, 2,4-dimethyl-                 | 12561 | 002213-23-2 52  |
| 16 | 6.252 | 0.65 |                                        |       |                 |
|    |       |      | Octane                                 | 7548  | 000111-65-9 83  |
|    |       |      | Octane                                 | 7546  | 000111-65-9 52  |
|    |       |      | Octane                                 | 7547  | 000111-65-9 52  |
| 17 | 6.303 | 0.18 |                                        |       |                 |
|    |       |      | Pentane, 3-methylene-                  | 1485  | 000760-21-4 38  |
|    |       |      | Hexanal, 3,3-dimethyl-                 | 12388 | 055320-57-5 27  |
|    |       |      | Pentane, 3-methylene-                  | 1482  | 000760-21-4 25  |
| 18 | 6.329 | 0.29 |                                        |       |                 |
|    |       |      | Heptane, 5-ethyl-2,2,3-trimethyl-      | 37516 | 062199-06-8 53  |
|    |       |      | Heptane, 2,2-dimethyl-                 | 12569 | 001071-26-7 47  |
|    |       |      | Hexane, 2,2,3-trimethyl-               | 12587 | 016747-25-4 47  |
| 19 | 6.380 | 0.62 |                                        |       |                 |
|    |       |      | Heptane, 2,3-dimethyl-                 | 12557 | 003074-71-3 58  |
|    |       |      | Heptane, 2,3-dimethyl-                 | 12547 | 003074-71-3 58  |
|    |       |      | Octane                                 | 7548  | 000111-65-9 53  |
| 20 | 6.421 | 0.37 |                                        |       |                 |
|    |       |      | Cyclopentane, 1-ethyl-2-methyl-, cis-  | 6763  | 000930-89-2 43  |
|    |       |      | 1-Ethyl-2-(4-methylpentyl)cyclopentane | 46131 | 219726-60-0 43  |
|    |       |      | Tris(aziridinomethyl)hydrazine         | 57387 | 1000254-64-1 43 |
| 21 | 6.508 | 1.27 |                                        |       |                 |
|    |       |      | Cyclooctane                            | 6564  | 000292-64-8 46  |
|    |       |      | Caprolactam                            | 6857  | 000105-60-2 38  |
|    |       |      | Cyclopentane, 1-ethyl-2-methyl-, cis-  | 6764  | 000930-89-2 25  |

|    |       |      |                                                   |       |                 |
|----|-------|------|---------------------------------------------------|-------|-----------------|
| 22 | 6.544 | 0.55 |                                                   |       |                 |
|    |       |      | Cyclopentane, propyl-                             | 6632  | 002040-96-2 49  |
|    |       |      | trans-1-Butyl-2-methylcyclopropane                | 6749  | 038851-70-6 43  |
|    |       |      | Cyclooctane                                       | 6564  | 000292-64-8 42  |
| 23 | 6.601 | 1.15 |                                                   |       |                 |
|    |       |      | Heptane, 3,5-dimethyl-                            | 12549 | 000926-82-9 41  |
|    |       |      | 3-Ethylcyclopentanone                             | 6435  | 010264-55-8 38  |
|    |       |      | Cyclohexane, ethyl-                               | 6598  | 001678-91-7 30  |
| 24 | 6.662 | 0.46 |                                                   |       |                 |
|    |       |      | Cyclohexane, 1,1,3-trimethyl-                     | 11475 | 003073-66-3 64  |
|    |       |      | Cyclohexane, 1,1,3-trimethyl-                     | 11476 | 003073-66-3 58  |
|    |       |      | 2,4,6-Trimethyl-1,5-diazabicyclo[3<br>.1.0]hexane | 11139 | 1000283-21-2 50 |
| 25 | 6.693 | 0.28 |                                                   |       |                 |
|    |       |      | 2-Butanone, oxime                                 | 1865  | 000096-29-7 46  |
|    |       |      | 2-Butanone, oxime                                 | 1863  | 000096-29-7 46  |
|    |       |      | 2-Butanone, oxime                                 | 1864  | 000096-29-7 46  |
| 26 | 6.750 | 0.38 |                                                   |       |                 |
|    |       |      | 2-Butanone, oxime                                 | 1863  | 000096-29-7 93  |
|    |       |      | 2-Butanone, oxime                                 | 1865  | 000096-29-7 86  |
|    |       |      | 2-Butanone, oxime                                 | 1864  | 000096-29-7 64  |
| 27 | 6.837 | 0.83 |                                                   |       |                 |
|    |       |      | 2-Butanone, oxime                                 | 1864  | 000096-29-7 90  |
|    |       |      | 2-Butanone, oxime                                 | 1863  | 000096-29-7 90  |
|    |       |      | 2-Butanone, oxime                                 | 1865  | 000096-29-7 60  |
| 28 | 6.955 | 1.82 |                                                   |       |                 |
|    |       |      | 2-Butanone, oxime                                 | 1864  | 000096-29-7 90  |
|    |       |      | 2-Butanone, oxime                                 | 1863  | 000096-29-7 89  |
|    |       |      | 2-Butanone, oxime                                 | 1865  | 000096-29-7 60  |
| 29 | 6.991 | 0.28 |                                                   |       |                 |
|    |       |      | 2-Butanone, oxime                                 | 1864  | 000096-29-7 78  |
|    |       |      | 2-Butanone, oxime                                 | 1865  | 000096-29-7 60  |
|    |       |      | 2-Butanone, oxime                                 | 1863  | 000096-29-7 53  |
| 30 | 7.042 | 1.54 |                                                   |       |                 |
|    |       |      | 2-Butanone, oxime                                 | 1865  | 000096-29-7 38  |

|    |       |      |                                            |       |              |    |
|----|-------|------|--------------------------------------------|-------|--------------|----|
|    |       |      | 2-Butanone, oxime                          | 1864  | 000096-29-7  | 27 |
|    |       |      | Thiophene, 2-butyltetrahydro-              | 20743 | 001613-49-6  | 25 |
| 31 | 7.140 | 0.79 |                                            |       |              |    |
|    |       |      | Benzene, 1,3-dimethyl-                     | 5058  | 000108-38-3  | 91 |
|    |       |      | p-Xylene                                   | 5030  | 000106-42-3  | 91 |
|    |       |      | o-Xylene                                   | 5039  | 000095-47-6  | 91 |
| 32 | 7.217 | 0.04 |                                            |       |              |    |
|    |       |      | 1,7-Octadiene, 2,3,3-trimethyl-            | 25014 | 1000150-47-7 | 50 |
|    |       |      | Cyclohexane, butyl-                        | 17749 | 001678-93-9  | 47 |
|    |       |      | Cyclohexane, ethyl-                        | 6602  | 001678-91-7  | 47 |
| 33 | 7.238 | 0.05 |                                            |       |              |    |
|    |       |      | 1,3-Butadiene, 2-methyl-                   | 460   | 000078-79-5  | 46 |
|    |       |      | 1,3-Butadiene, 2-methyl-                   | 459   | 000078-79-5  | 46 |
|    |       |      | 2,3-Pentadiene                             | 435   | 000591-96-8  | 42 |
| 34 | 7.392 | 0.02 | C:\Database\NIST08.                        |       |              |    |
|    |       |      | 1-Ethyl-4-methylcyclohexane                | 11451 | 003728-56-1  | 95 |
|    |       |      | cis-1-Ethyl-3-methyl-cyclohexane           | 11486 | 019489-10-2  | 94 |
|    |       |      | 1-Ethyl-3-methylcyclohexane (c,t)          | 11488 | 003728-55-0  | 81 |
| 35 | 7.458 | 0.18 |                                            |       |              |    |
|    |       |      | Benzene, 1,3-dimethyl-                     | 5055  | 000108-38-3  | 95 |
|    |       |      | o-Xylene                                   | 5039  | 000095-47-6  | 95 |
|    |       |      | p-Xylene                                   | 5030  | 000106-42-3  | 95 |
| 36 | 7.561 | 0.22 |                                            |       |              |    |
|    |       |      | Nonane                                     | 12526 | 000111-84-2  | 95 |
|    |       |      | Nonane                                     | 12527 | 000111-84-2  | 95 |
|    |       |      | Nonane                                     | 12528 | 000111-84-2  | 93 |
| 37 | 7.628 | 0.01 |                                            |       |              |    |
|    |       |      | 2-Ethylbutyl propionate                    | 29631 | 090677-00-2  | 35 |
|    |       |      | 1-Methoxy-4,4-dimethyl-cyclohex-1-ene      | 18548 | 073741-65-8  | 27 |
|    |       |      | 2,3,4,4a,8,8a-Hexahydro-pyrano[3,2-b]pyran | 18282 | 1000189-55-7 | 27 |
| 38 | 7.849 | 0.07 |                                            |       |              |    |
|    |       |      | Cyclopentane, 1,2,3,4,5-pentamethyl-       | 17833 | 1000152-79-7 | 64 |
|    |       |      | 3,6,6-Trimethyl-cyclohex-2-enol            | 18506 | 073741-62-5  | 50 |

|    |       |      |                                                      |        |              |    |
|----|-------|------|------------------------------------------------------|--------|--------------|----|
|    |       |      | 2H-Pyran, 3,4-dihydro-                               | 1415   | 000110-87-2  | 47 |
| 39 | 7.900 | 0.08 |                                                      |        |              |    |
|    |       |      | Cyclohexane, 1-methyl-3-propyl-                      | 17809  | 004291-80-9  | 64 |
|    |       |      | Sulfurous acid, cyclohexylmethyl n<br>onyl ester     | 139611 | 1000309-21-8 | 53 |
|    |       |      | Cyclohexane, 1-methyl-4-(1-methyle<br>thyl)-, trans- | 17855  | 001678-82-6  | 53 |
| 40 | 7.977 | 0.06 |                                                      |        |              |    |
|    |       |      | Cyclopentane, 1,2,3,4,5-pentamethyl-                 | 17833  | 1000152-79-7 | 72 |
|    |       |      | Furan, 2,3-dihydro-3-methyl-                         | 1438   | 001708-27-6  | 43 |
|    |       |      | 3-Penten-2-one                                       | 1390   | 000625-33-2  | 43 |
| 41 | 8.126 | 0.02 |                                                      |        |              |    |
|    |       |      | Octane, 2,6-dimethyl-                                | 18952  | 002051-30-1  | 95 |
|    |       |      | Octane, 2,6-dimethyl-                                | 18948  | 002051-30-1  | 93 |
|    |       |      | Octane, 3,6-dimethyl-                                | 18953  | 015869-94-0  | 90 |
| 42 | 8.568 | 0.03 |                                                      |        |              |    |
|    |       |      | 1H-Pyrazole, 3-ethyl-4,5-dihydro-                    | 3036   | 005920-29-6  | 50 |
|    |       |      | 2-Cyclohexen-1-one, 3,5-dimethyl-,<br>O-methyloxime  | 26130  | 056336-06-2  | 50 |
|    |       |      | 2-Pentene, 4,4-dimethyl-                             | 3325   | 026232-98-4  | 50 |
| 43 | 8.686 | 0.03 |                                                      |        |              |    |
|    |       |      | Octane, 2,3-dimethyl-                                | 18946  | 007146-60-3  | 38 |
|    |       |      | Cyclohexanone, 4-(1,1-dimethylethy<br>l)-            | 26328  | 000098-53-3  | 38 |
|    |       |      | Thiophene, 2-methyl-                                 | 3097   | 000554-14-3  | 35 |
| 44 | 8.758 | 0.01 |                                                      |        |              |    |
|    |       |      | 3-Hexene, 2,3-dimethyl-                              | 6643   | 007145-23-5  | 76 |
|    |       |      | Cyclohexane, (1,2-dimethylbutyl)-                    | 36064  | 061142-37-8  | 46 |
|    |       |      | 3-Ethyl-4-methyl-2-pentene                           | 6670   | 019780-68-8  | 46 |
| 45 | 9.435 | 0.02 |                                                      |        |              |    |
|    |       |      | 2-Pentene, 4,4-dimethyl-, (E)-                       | 3374   | 000690-08-4  | 58 |
|    |       |      | 2-Pentene, 3,4-dimethyl-                             | 3324   | 024910-63-2  | 52 |
|    |       |      | 2-Pentene, 3,4-dimethyl-, (Z)-                       | 3367   | 004914-91-4  | 50 |
| 46 | 9.569 | 0.09 |                                                      |        |              |    |
|    |       |      | 3-Heptene, 2,2,3,5,6-pentamethyl-                    | 36065  | 116164-06-8  | 47 |
|    |       |      | 2,2,4-Trimethyl-3-hexene                             | 11429  | 059643-72-0  | 46 |

|    |        |      |                                                                             |        |              |    |
|----|--------|------|-----------------------------------------------------------------------------|--------|--------------|----|
|    |        |      | Cyclohexane, 1,1,3,5-tetramethyl-, cis-                                     | 17837  | 050876-32-9  | 43 |
| 47 | 9.620  | 0.03 |                                                                             |        |              |    |
|    |        |      | cis,cis,cis-1-Isobutyl-2,5-dimethylcyclohexane                              | 36080  | 1000113-60-0 | 76 |
|    |        |      | Cyclohexane, 1,4-dimethyl-2-(2-methylpropyl)-, (1.alpha.,2.beta.,5.alpha.)- | 36083  | 054411-17-5  | 64 |
|    |        |      | Cyclohexane, 1,1,3-trimethyl-                                               | 11475  | 003073-66-3  | 59 |
| 48 | 9.857  | 0.01 |                                                                             |        |              |    |
|    |        |      | Ethyl 3-oxoheptanoate                                                       | 39427  | 007737-62-4  | 47 |
|    |        |      | Oxalic acid, diisohexyl ester                                               | 103928 | 1000309-32-9 | 38 |
|    |        |      | Oxalic acid, hexyl isohexyl ester                                           | 103942 | 1000309-33-0 | 38 |
| 49 | 10.036 | 0.02 |                                                                             |        |              |    |
|    |        |      | Sulfurous acid, cyclohexylmethyl isohexyl ester                             | 106953 | 1000309-21-5 | 59 |
|    |        |      | Sulfurous acid, cyclohexylmethyl tetradecyl ester                           | 184919 | 1000309-22-2 | 59 |
|    |        |      | Cyclopentanecarboxylic acid, 4-hexadecyl ester                              | 164250 | 1000282-77-5 | 59 |
| 50 | 10.134 | 0.04 |                                                                             |        |              |    |
|    |        |      | 3-Hexene, 2,3-dimethyl-                                                     | 6643   | 007145-23-5  | 64 |
|    |        |      | 3-Hexene, 2,3-dimethyl-                                                     | 6657   | 007145-23-5  | 59 |
|    |        |      | 2,4-Dimethyl-3-hexene(c,t)                                                  | 6669   | 1000118-16-4 | 45 |
| 51 | 10.288 | 0.02 |                                                                             |        |              |    |
|    |        |      | 3-Heptene, 2,2,3,5,6-pentamethyl-                                           | 36065  | 116164-06-8  | 76 |
|    |        |      | cis,cis,cis-1-Isobutyl-2,5-dimethylcyclohexane                              | 36080  | 1000113-60-0 | 38 |
|    |        |      | 2,4-Dimethyl-3-hexene(c,t)                                                  | 6669   | 1000118-16-4 | 38 |
| 52 | 13.184 | 0.43 |                                                                             |        |              |    |
|    |        |      | Propyl aldoxime, 2-methyl-, anti-                                           | 1892   | 005775-73-5  | 27 |
|    |        |      | 1H-Indole-3-acetamide, N,N-dimethyl-1.alpha.-oxo-                           | 71452  | 029095-44-1  | 18 |
|    |        |      | Propyl aldoxime, 2-methyl-, syn-                                            | 1891   | 005780-39-2  | 16 |
| 53 | 13.302 | 1.33 |                                                                             |        |              |    |
|    |        |      | Propyl aldoxime, 2-methyl-, anti-                                           | 1892   | 005775-73-5  | 27 |
|    |        |      | Propyl aldoxime, 2-methyl-, syn-                                            | 1891   | 005780-39-2  | 16 |
|    |        |      | 1,3-Cyclobutanedione, 2,2,4,4-tetramethyl-                                  | 18281  | 000933-52-8  | 16 |



|    |        |      |                                                             |        |              |    |
|----|--------|------|-------------------------------------------------------------|--------|--------------|----|
| 54 | 13.410 | 0.50 |                                                             |        |              |    |
|    |        |      | Propyl aldoxime, 2-methyl-, anti-                           | 1892   | 005775-73-5  | 27 |
|    |        |      | 1H-Indole-3-acetamide, N,N-dimethyl-                        | 71452  | 029095-44-1  | 18 |
|    |        |      | 1-.alpha.-oxo-                                              |        |              |    |
|    |        |      | Propyl aldoxime, 2-methyl-, syn-                            | 1891   | 005780-39-2  | 16 |
| 55 | 13.924 | 0.76 |                                                             |        |              |    |
|    |        |      | Azetidine, n-propyl-                                        | 3511   |              | 39 |
|    |        |      | Cyclohexanamine, N-methyl-N-nitroso-                        | 19293  | 005432-28-0  | 38 |
|    |        |      | Cyclohexanamine, N-methyl-                                  | 6938   | 000100-60-7  | 9  |
| 56 | 15.249 | 0.09 |                                                             |        |              |    |
|    |        |      | Azetidine, 1,1'-methylenebis-                               | 11113  | 038455-24-2  | 43 |
|    |        |      | 1-Methoxy-2,3-cis-dimethylaziridine (sin)                   | 4101   | 061593-25-7  | 43 |
|    |        |      | 1,3-Cyclobutanedione, 2,2,4,4-tetra-                        | 18281  | 000933-52-8  | 37 |
|    |        |      | amethyl-                                                    |        |              |    |
| 57 | 18.643 | 9.64 |                                                             |        |              |    |
|    |        |      | 1-Methoxy-2,3-cis-dimethylaziridine (sin)                   | 4101   | 061593-25-7  | 16 |
|    |        |      | Azetidine, n-propyl-                                        | 3511   |              | 16 |
|    |        |      | Phosphine oxide, methyl-diphenyl-                           | 71649  | 002129-89-7  | 12 |
| 58 | 18.802 | 2.91 |                                                             |        |              |    |
|    |        |      | Decyl alcohol, tert-butyldimethylsilyl ether                | 115281 | 1000333-00-5 | 22 |
|    |        |      | Azetidine, n-propyl-                                        | 3511   |              | 16 |
|    |        |      | 1-Methoxy-2,3-cis-dimethylaziridine (sin)                   | 4101   | 061593-25-7  | 12 |
| 59 | 18.890 | 1.41 |                                                             |        |              |    |
|    |        |      | Decyl alcohol, tert-butyldimethylsilyl ether                | 115281 | 1000333-00-5 | 22 |
|    |        |      | 1-Methoxy-2,3-cis-dimethylaziridine(sin)                    | 4101   | 061593-25-7  | 12 |
|    |        |      | (S)-(+)-2-Pyrrolidinemethanol                               | 4081   | 023356-96-9  | 10 |
| 60 | 18.961 | 1.85 |                                                             |        |              |    |
|    |        |      | 1-Methoxy-2,3-cis-dimethylaziridine (sin)                   | 4101   | 061593-25-7  | 17 |
|    |        |      | 2,4,6(1H,3H,5H)-Pyrimidinetrione, 5-(2-pyridinylmethylene)- | 72128  | 068160-61-2  | 10 |
| 61 | 19.095 | 1.15 |                                                             |        |              |    |
|    |        |      | Azetidine, n-propyl-                                        | 3511   |              | 25 |
|    |        |      | Decyl alcohol, tert-butyldimethylsilyl ether                | 115281 | 1000333-00-5 | 14 |
|    |        |      | 2,4,6(1H,3H,5H)-Pyrimidinetrione,                           | 72128  | 068160-61-2  | 10 |

## 5-(2-pyridinylmethylene)-

|    |        |      |                                                                                                |        |              |    |
|----|--------|------|------------------------------------------------------------------------------------------------|--------|--------------|----|
| 62 | 19.290 | 4.66 |                                                                                                |        |              |    |
|    |        |      | Azetidine, n-propyl-                                                                           | 3511   |              | 25 |
|    |        |      | 1-Methoxy-2,3-cis-dimethylaziridine (sin)                                                      | 4101   | 061593-25-7  | 17 |
|    |        |      | Decyl alcohol, tert-butyl dimethylsilyl ether                                                  | 115281 | 1000333-00-5 | 14 |
| 63 | 22.525 | 0.42 |                                                                                                |        |              |    |
|    |        |      | 3-Amino-6-nitro-4-phenylsulfanyl-benzo[b]thiophene-2-carboxylic acid methyl ester              | 177075 | 1000275-36-3 | 32 |
|    |        |      | Benzoic acid, 4-(3,4-dihydro-2,4-dioxo-2H-pyrimido[4,5-b]quinolin-10-yl)-, ethyl ester         | 177893 | 317326-96-8  | 27 |
|    |        |      | 1-Methoxy-2,3-cis-dimethylaziridine (sin)                                                      | 4101   | 061593-25-7  | 25 |
| 64 | 22.679 | 0.29 |                                                                                                |        |              |    |
|    |        |      | 3-Amino-6-nitro-4-phenylsulfanyl-benzo[b]thiophene-2-carboxylic acid methyl ester              | 177075 | 1000275-36-3 | 37 |
|    |        |      | Thianthrene, octafluoro-                                                                       | 176996 | 016012-83-2  | 25 |
|    |        |      | 2-Quinolinecarboxylic acid, 4-[(tert-butyl dimethylsilyl)oxy]-, tert-butyl dimethylsilyl ester | 200507 | 1000221-71-1 | 23 |
| 65 | 22.828 | 0.48 |                                                                                                |        |              |    |
|    |        |      | Thianthrene, octafluoro-                                                                       | 176996 | 016012-83-2  | 25 |
|    |        |      | 2-Quinolinecarboxylic acid, 4-[(tert-butyl dimethylsilyl)oxy]-, tert-butyl dimethylsilyl ester | 200507 | 1000221-71-1 | 23 |
|    |        |      | cis-2,3-Dimethyl-1-(p-nitrobenzoyl)aziridine                                                   | 74197  | 021383-77-7  | 9  |
| 66 | 22.957 | 0.36 |                                                                                                |        |              |    |
|    |        |      | Thianthrene, octafluoro-                                                                       | 176996 | 016012-83-2  | 25 |
|    |        |      | 2-Quinolinecarboxylic acid, 4-[(tert-butyl dimethylsilyl)oxy]-, tert-butyl dimethylsilyl ester | 200507 | 1000221-71-1 | 23 |
|    |        |      | N,N'-di-2-Naphthyl-p-phenylenediamine                                                          | 177642 | 000093-46-9  | 9  |

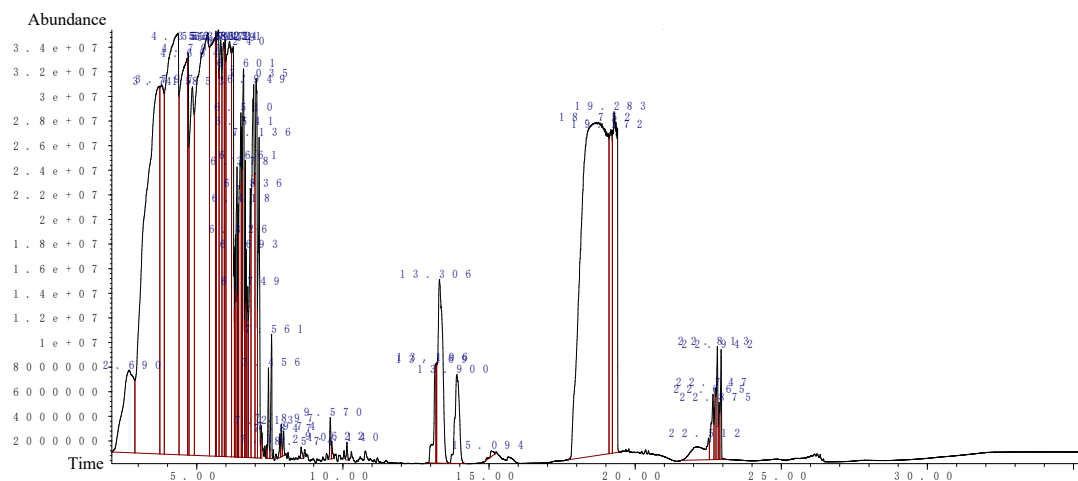

|    |       |       |                                                               |       |             |    |
|----|-------|-------|---------------------------------------------------------------|-------|-------------|----|
|    |       |       | Cycloheptane                                                  | 3275  | 000291-64-5 | 64 |
|    |       |       | 1-Heptene                                                     | 3269  | 000592-76-7 | 46 |
|    |       |       | Cyclopropane, 1,1,2,3-tetramethyl-                            | 3385  | 074752-93-5 | 43 |
| 5  | 4.665 | 5.52  |                                                               |       |             |    |
|    |       |       | Cyclohexane, methyl-                                          | 3312  | 000108-87-2 | 58 |
|    |       |       | 3-Penten-2-one, 4-methyl-                                     | 3203  | 000141-79-7 | 43 |
|    |       |       | Cycloheptane                                                  | 3274  | 000291-64-5 | 43 |
| 6  | 4.706 | 0.95  |                                                               |       |             |    |
|    |       |       | Cyclohexane, methyl-                                          | 3312  | 000108-87-2 | 47 |
|    |       |       | 1-Pentene, 2,3-dimethyl-                                      | 3333  | 003404-72-6 | 43 |
|    |       |       | 2-Pentene, 2,3-dimethyl-                                      | 3323  | 010574-37-5 | 38 |
| 7  | 4.855 | 3.15  |                                                               |       |             |    |
|    |       |       | Cyclopentane, 1,3-dimethyl-                                   | 3364  | 002453-00-1 | 46 |
|    |       |       | 1-Hexene, 4-ethyl-                                            | 6593  | 016746-85-3 | 41 |
|    |       |       | Cyclopentane, 1,2,3-trimethyl-, (1.alpha.,2.alpha.,3.alpha.)- | 6770  | 002613-69-6 | 38 |
| 8  | 5.384 | 10.07 |                                                               |       |             |    |
|    |       |       | Octane, 4-methyl-                                             | 12531 | 002216-34-4 | 46 |
|    |       |       | Hexane, 2,3,4-trimethyl-                                      | 12578 | 000921-47-1 | 43 |
|    |       |       | Heptane, 2-methyl-                                            | 7560  | 000592-27-8 | 38 |
| 9  | 5.625 | 4.20  |                                                               |       |             |    |
|    |       |       | Octane                                                        | 7547  | 000111-65-9 | 64 |
|    |       |       | Heptane, 2-methyl-                                            | 7560  | 000592-27-8 | 41 |
|    |       |       | Hexane, 3-methyl-                                             | 3947  | 000589-34-4 | 38 |
| 10 | 5.656 | 0.66  |                                                               |       |             |    |
|    |       |       | Octane                                                        | 7548  | 000111-65-9 | 62 |
|    |       |       | Heptane, 3-methyl-                                            | 7552  | 000589-81-1 | 55 |
|    |       |       | Heptane, 4-methyl-                                            | 7554  | 000589-53-7 | 45 |
| 11 | 5.743 | 1.90  |                                                               |       |             |    |
|    |       |       | Hexane, 3-ethyl-                                              | 7550  | 000619-99-8 | 52 |
|    |       |       | Heptane, 3,4,5-trimethyl-                                     | 18959 | 020278-89-1 | 49 |
|    |       |       | Heptane, 3-methyl-                                            | 7556  | 000589-81-1 | 49 |
| 12 | 5.820 | 1.96  |                                                               |       |             |    |
|    |       |       | Cyclohexane, 1,2-dimethyl-, trans-                            | 6752  | 006876-23-9 | 89 |
|    |       |       | Cyclohexane, 1,2-dimethyl-                                    | 6671  | 000583-57-3 | 76 |
|    |       |       | Cyclohexane, 1,2-dimethyl-, trans-                            | 6757  | 006876-23-9 | 76 |

|    |       |      |                                           |       |                |
|----|-------|------|-------------------------------------------|-------|----------------|
| 13 | 5.918 | 1.62 |                                           |       |                |
|    |       |      | Cyclopentane, 1-ethyl-2-methyl-, c<br>is- | 6763  | 000930-89-2 90 |
|    |       |      | Cyclopentane, 1-ethyl-2-methyl-, c<br>is- | 6761  | 000930-89-2 86 |
|    |       |      | Cyclopentane, 1-ethyl-2-methyl-           | 6730  | 003726-46-3 86 |
| 14 | 5.974 | 1.13 |                                           |       |                |
|    |       |      | Octane                                    | 7548  | 000111-65-9 52 |
|    |       |      | Cyclopentane, 1-ethyl-2-methyl-, cis-     | 6763  | 000930-89-2 46 |
|    |       |      | 1,2-Cyclohexanedione                      | 6312  | 000765-87-7 43 |
| 15 | 6.123 | 3.86 |                                           |       |                |
|    |       |      | Octane                                    | 7548  | 000111-65-9 83 |
|    |       |      | Pentane, 3-ethyl-2-methyl-                | 7595  | 000609-26-7 58 |
|    |       |      | Heptane, 2,4-dimethyl-                    | 12548 | 002213-23-2 53 |
| 16 | 6.241 | 1.70 |                                           |       |                |
|    |       |      | Octane                                    | 7548  | 000111-65-9 87 |
|    |       |      | Heptane, 2,4-dimethyl-                    | 12548 | 002213-23-2 64 |
|    |       |      | Heptane, 2,3-dimethyl-                    | 12558 | 003074-71-3 64 |
| 17 | 6.324 | 0.48 |                                           |       |                |
|    |       |      | Octane, 1,1'-oxybis-                      | 91961 | 000629-82-3 43 |
|    |       |      | Hexane, 2,2,5,5-tetramethyl-              | 18981 | 001071-81-4 43 |
|    |       |      | Heptane, 2,2-dimethyl-                    | 12569 | 001071-26-7 43 |
| 18 | 6.380 | 0.64 |                                           |       |                |
|    |       |      | Heptane, 2,3-dimethyl-                    | 12557 | 003074-71-3 58 |
|    |       |      | Heptane, 2,3-dimethyl-                    | 12547 | 003074-71-3 58 |
|    |       |      | Heptane, 2,4-dimethyl-                    | 12548 | 002213-23-2 53 |
| 19 | 6.416 | 0.37 |                                           |       |                |
|    |       |      | Cyclopentane, 1-ethyl-2-methyl-, cis-     | 6763  | 000930-89-2 89 |
|    |       |      | Cyclopentane, 1-ethyl-2-methyl-, cis-     | 6764  | 000930-89-2 70 |
|    |       |      | Cyclopentane, 1-ethyl-2-methyl-, cis-     | 6761  | 000930-89-2 60 |
| 20 | 6.508 | 1.30 |                                           |       |                |
|    |       |      | Cyclooctane                               | 6564  | 000292-64-8 46 |
|    |       |      | Caprolactam                               | 6857  | 000105-60-2 38 |
|    |       |      | Cyclopentane, 1-ethyl-2-methyl-, cis-     | 6764  | 000930-89-2 25 |
| 21 | 6.539 | 0.55 |                                           |       |                |

|    |       |      |                                    |       |             |    |
|----|-------|------|------------------------------------|-------|-------------|----|
|    |       |      | Cyclooctane                        | 6564  | 000292-64-8 | 46 |
|    |       |      | trans-1-Butyl-2-methylcyclopropane | 6749  | 038851-70-6 | 46 |
|    |       |      | 3-Octene, (E)-                     | 6566  | 014919-01-8 | 43 |
| 22 | 6.601 | 1.17 |                                    |       |             |    |
|    |       |      | Heptane, 3,5-dimethyl-             | 12549 | 000926-82-9 | 41 |
|    |       |      | 1-Pentene, 4,4-dimethyl-           | 3338  | 000762-62-9 | 30 |
|    |       |      | Cyclohexane, ethyl-                | 6601  | 001678-91-7 | 30 |
| 23 | 6.662 | 0.48 |                                    |       |             |    |
|    |       |      | Cyclohexane, 1,1,3-trimethyl-      | 11476 | 003073-66-3 | 64 |
|    |       |      | Cyclohexane, 1,1,3-trimethyl-      | 11475 | 003073-66-3 | 52 |
|    |       |      | Cyclohexane, 1,1,3-trimethyl-      | 11460 | 003073-66-3 | 50 |
| 24 | 6.693 | 0.29 |                                    |       |             |    |
|    |       |      | 2-Butanone, oxime                  | 1863  | 000096-29-7 | 46 |
|    |       |      | 2-Butanone, oxime                  | 1864  | 000096-29-7 | 46 |
|    |       |      | 2-Butanone, oxime                  | 1865  | 000096-29-7 | 46 |
| 25 | 6.750 | 0.39 |                                    |       |             |    |
|    |       |      | 2-Butanone, oxime                  | 1865  | 000096-29-7 | 89 |
|    |       |      | 2-Butanone, oxime                  | 1864  | 000096-29-7 | 76 |
|    |       |      | Cyclobutane, methyl-               | 570   | 000598-61-8 | 35 |
| 26 | 6.837 | 0.85 |                                    |       |             |    |
|    |       |      | 2-Butanone, oxime                  | 1864  | 000096-29-7 | 90 |
|    |       |      | 2-Butanone, oxime                  | 1863  | 000096-29-7 | 90 |
|    |       |      | 2-Butanone, oxime                  | 1865  | 000096-29-7 | 60 |
| 27 | 6.950 | 2.08 |                                    |       |             |    |
|    |       |      | Ethylbenzene                       | 5042  | 000100-41-4 | 40 |
|    |       |      | 1,3-Dioxolane, 2-ethyl-2-methyl-   | 8092  | 000126-39-6 | 27 |
|    |       |      | Ethylbenzene                       | 5040  | 000100-41-4 | 25 |
| 28 | 7.032 | 1.40 |                                    |       |             |    |
|    |       |      | 2-Butanone, oxime                  | 1864  | 000096-29-7 | 30 |
|    |       |      | 2-Butanone, oxime                  | 1865  | 000096-29-7 | 30 |
|    |       |      | Thiophene, 2-butyltetrahydro-      | 20742 | 001613-49-6 | 25 |
| 29 | 7.135 | 0.94 |                                    |       |             |    |
|    |       |      | o-Xylene                           | 5039  | 000095-47-6 | 92 |
|    |       |      | p-Xylene                           | 5032  | 000106-42-3 | 92 |
|    |       |      | p-Xylene                           | 5030  | 000106-42-3 | 92 |

|    |       |      |                                                   |        |                 |
|----|-------|------|---------------------------------------------------|--------|-----------------|
| 30 | 7.212 | 0.05 |                                                   |        |                 |
|    |       |      | 1,7-Octadiene, 2,3,3-trimethyl-                   | 25014  | 1000150-47-7 50 |
|    |       |      | Oxalic acid, cyclohexyl pentyl ester              | 91473  | 1000309-30-6 43 |
|    |       |      | 2-Hexene, 4,4,5-trimethyl-                        | 11444  | 055702-61-9 43  |
| 31 | 7.392 | 0.02 |                                                   |        |                 |
|    |       |      | cis-1-Ethyl-3-methyl-cyclohexane                  | 11486  | 019489-10-2 92  |
|    |       |      | 1-Ethyl-3-methylcyclohexane (c,t)                 | 11488  | 003728-55-0 91  |
|    |       |      | 1-Ethyl-4-methylcyclohexane                       | 11451  | 003728-56-1 83  |
| 32 | 7.458 | 0.16 |                                                   |        |                 |
|    |       |      | p-Xylene                                          | 5032   | 000106-42-3 95  |
|    |       |      | Benzene, 1,3-dimethyl-                            | 5055   | 000108-38-3 95  |
|    |       |      | p-Xylene                                          | 5033   | 000106-42-3 95  |
| 33 | 7.561 | 0.23 |                                                   |        |                 |
|    |       |      | Nonane                                            | 12526  | 000111-84-2 95  |
|    |       |      | Nonane                                            | 12527  | 000111-84-2 95  |
|    |       |      | Nonane                                            | 12528  | 000111-84-2 83  |
| 34 | 7.849 | 0.05 |                                                   |        |                 |
|    |       |      | 1H-Imidazole, 4,5-dihydro-2-methyl                | 1365   | 000534-26-9 50  |
|    |       |      | 2-Acetylpiperidine                                | 11682  | 097073-22-8 47  |
|    |       |      | Perdeuterobenzene                                 | 1443   | 001076-43-3 43  |
| 35 | 7.895 | 0.06 |                                                   |        |                 |
|    |       |      | Sulfurous acid, cyclohexylmethyl hexyl ester      | 106952 | 1000309-21-6 53 |
|    |       |      | Sulfurous acid, cyclohexylmethyl nonyl ester      | 139611 | 1000309-21-8 53 |
|    |       |      | Cyclohexane, 1-methyl-4-(1-methyl-ethyl)-, trans- | 17855  | 001678-82-6 53  |
| 36 | 7.972 | 0.05 |                                                   |        |                 |
|    |       |      | Cyclopentane, 1,2,3,4,5-pentamethyl-              | 17833  | 1000152-79-7 53 |
|    |       |      | 2-Cyclohexen-1-ol, 2,4,4-trimethyl                | 18535  | 073741-61-4 49  |
|    |       |      | 3-Amino-s-triazole                                | 1319   | 000061-82-5 43  |
| 37 | 8.573 | 0.03 |                                                   |        |                 |
|    |       |      | 2-Pentene, 2,3-dimethyl-                          | 3323   | 010574-37-5 46  |
|    |       |      | 3-Methyldec-3-ene                                 | 26568  | 036969-75-2 43  |
|    |       |      | 2,4-Azetidinedione, 3,3-diethyl-                  | 18693  | 042282-85-9 43  |

|    |        |      |                                                    |       |                 |
|----|--------|------|----------------------------------------------------|-------|-----------------|
| 38 | 9.569  | 0.09 |                                                    |       |                 |
|    |        |      | Cyclohexane, 1,1,3,5-tetramethyl-, trans-          | 17843 | 050876-31-8 45  |
|    |        |      | Cyclohexane, 1,1,3,5-tetramethyl-, cis-            | 17837 | 050876-32-9 43  |
|    |        |      | 2,2,4-Trimethyl-3-hexene                           | 11429 | 059643-72-0 43  |
| 39 | 9.620  | 0.04 |                                                    |       |                 |
|    |        |      | Cyclohexane, 1,1,3-trimethyl-                      | 11476 | 003073-66-3 59  |
|    |        |      | Cyclohexane, 1-ethyl-1,3-dimethyl-, trans-         | 17849 | 062238-29-3 53  |
|    |        |      | Cyclohexane, 1,1,3-trimethyl-                      | 11475 | 003073-66-3 50  |
| 40 | 10.139 | 0.04 |                                                    |       |                 |
|    |        |      | 3-Hexene, 2,3-dimethyl-                            | 6657  | 007145-23-5 59  |
|    |        |      | 3-Ethyl-4-methyl-2-pentene                         | 6670  | 019780-68-8 46  |
|    |        |      | 3-Hexene, 3,4-dimethyl-                            | 6641  | 030951-95-2 43  |
| 41 | 13.169 | 0.41 |                                                    |       |                 |
|    |        |      | Propyl aldoxime, 2-methyl-, anti-                  | 1892  | 005775-73-5 27  |
|    |        |      | Propyl aldoxime, 2-methyl-, syn-                   | 1891  | 005780-39-2 16  |
|    |        |      | Azetidine, n-propyl-                               | 3511  | 16              |
| 42 | 13.195 | 0.13 |                                                    |       |                 |
|    |        |      | Propyl aldoxime, 2-methyl-, anti-                  | 1892  | 005775-73-5 27  |
|    |        |      | Azetidine, n-propyl-                               | 3511  | 16              |
|    |        |      | Propyl aldoxime, 2-methyl-, syn-                   | 1891  | 005780-39-2 16  |
| 43 | 13.308 | 1.78 |                                                    |       |                 |
|    |        |      | Propyl aldoxime, 2-methyl-, anti-                  | 1892  | 005775-73-5 27  |
|    |        |      | Propyl aldoxime, 2-methyl-, syn-                   | 1891  | 005780-39-2 16  |
|    |        |      | Alanine, N-methyl-n-propoxycarbonyl-, propyl ester | 83208 | 1000329-42-9 14 |
| 44 | 13.898 | 0.78 |                                                    |       |                 |
|    |        |      | Azetidine, n-propyl-                               | 3511  | 39              |
|    |        |      | Cyclohexanamine, N-methyl-N-nitroso-               | 19293 | 005432-28-0 38  |
|    |        |      | 1-n-Butoxy-2,3-dimethyldiaziridine                 | 20073 | 343928-70-1 32  |
| 45 | 15.095 | 0.03 |                                                    |       |                 |
|    |        |      | 1,3-Cyclobutanedione, 2,2,4,4-tetramethyl-         | 18281 | 000933-52-8 38  |
|    |        |      | 1-Methoxy-2,3-cis-dimethylaziridine (sin)          | 4101  | 061593-25-7 28  |
|    |        |      | Azetidine, 1,1'-methylenebis-                      | 11113 | 038455-24-2 28  |



|    |        |       |                                                                                              |        |              |    |
|----|--------|-------|----------------------------------------------------------------------------------------------|--------|--------------|----|
| 46 | 18.751 | 16.86 | Decyl alcohol, tert-butyldimethylsilyl ether                                                 | 115281 | 1000333-00-5 | 22 |
|    |        |       | Azetidine, n-propyl-                                                                         | 3511   |              | 16 |
|    |        |       | 1-Methoxy-2,3-cis-dimethylaziridine (sin)                                                    | 4101   | 061593-25-7  | 12 |
| 47 | 19.172 | 1.83  | Azetidine, n-propyl-                                                                         | 3511   |              | 25 |
|    |        |       | (S)-(+)-2-Pyrrolidinemethanol                                                                | 4081   | 023356-96-9  | 10 |
|    |        |       | 2H-Pyran-2,6(3H)-dione, dihydro-                                                             | 7058   | 000108-55-4  | 10 |
| 48 | 19.285 | 2.96  | Azetidine, n-propyl-                                                                         | 3511   |              | 17 |
|    |        |       | Nonanoic acid, tert-butyldimethylsilyl ester                                                 | 115100 | 104255-73-4  | 10 |
|    |        |       | (R)-(-)-2-Pyrrolidinemethanol                                                                | 4079   | 068832-13-3  | 10 |
| 49 | 22.510 | 0.44  | Benzoic acid, 4-(3,4-dihydro-2,4-dioxo-2H-pyrimido[4,5-b]quinolin-10-yl)-, ethyl ester       | 177893 | 317326-96-8  | 27 |
|    |        |       | 1-Methoxy-2,3-cis-dimethylaziridine (sin)                                                    | 4101   | 061593-25-7  | 25 |
|    |        |       | 1,10-Phenanthroline, 2,9-dimethyl-4,7-diphenyl-                                              | 177648 | 004733-39-5  | 25 |
| 50 | 22.664 | 0.30  | 3-Amino-6-nitro-4-phenylsulfanylbenzo[b]thiophene-2-carboxylic acid methyl ester             | 177075 | 1000275-36-3 | 50 |
|    |        |       | Thianthrene, octafluoro-                                                                     | 176996 | 016012-83-2  | 25 |
|    |        |       | 2-Quinolinecarboxylic acid, 4-[(tert-butyldimethylsilyl)oxy]-, tert-butyldimethylsilyl ester | 200507 | 1000221-71-1 | 23 |
| 51 | 22.746 | 0.20  | 3-Amino-6-nitro-4-phenylsulfanylbenzo[b]thiophene-2-carboxylic acid methyl ester             | 177075 | 1000275-36-3 | 50 |
|    |        |       | Thianthrene, octafluoro-                                                                     | 176996 | 016012-83-2  | 25 |
|    |        |       | 2-Quinolinecarboxylic acid, 4-[(tert-butyldimethylsilyl)oxy]-, tert-butyldimethylsilyl ester | 200507 | 1000221-71-1 | 23 |

|    |        |      |                                                                                                |        |              |    |
|----|--------|------|------------------------------------------------------------------------------------------------|--------|--------------|----|
| 52 | 22.813 | 0.30 |                                                                                                |        |              |    |
|    |        |      | Thianthrene, octafluoro-                                                                       | 176996 | 016012-83-2  | 25 |
|    |        |      | 2-Quinolinecarboxylic acid, 4-[(tert-butyl)dimethylsilyl]oxy]-, tert-butyl)dimethylsilyl ester | 200507 | 1000221-71-1 | 23 |
|    |        |      | N,N'-di-2-Naphthyl-p-phenylenediamine                                                          | 177646 | 000093-46-9  | 9  |
| 53 | 22.875 | 0.13 |                                                                                                |        |              |    |
|    |        |      | 3-Amino-6-nitro-4-phenylsulfanyl-benzo[b]thiophene-2-carboxylic acid methyl ester              | 177075 | 1000275-36-3 | 50 |
|    |        |      | Thianthrene, octafluoro-                                                                       | 176996 | 016012-83-2  | 25 |
|    |        |      | 2-Quinolinecarboxylic acid, 4-[(tert-butyl)dimethylsilyl]oxy]-, tert-butyl)dimethylsilyl ester | 200507 | 1000221-71-1 | 23 |
| 54 | 22.941 | 0.23 |                                                                                                |        |              |    |
|    |        |      | Thianthrene, octafluoro-                                                                       | 176996 | 016012-83-2  | 25 |
|    |        |      | 2-Quinolinecarboxylic acid, 4-[(tert-butyl)dimethylsilyl]oxy]-, tert-butyl)dimethylsilyl ester | 200507 | 1000221-71-1 | 23 |
|    |        |      | N,N'-di-2-Naphthyl-p-phenylenediamine                                                          | 177646 | 000093-46-9  | 9  |

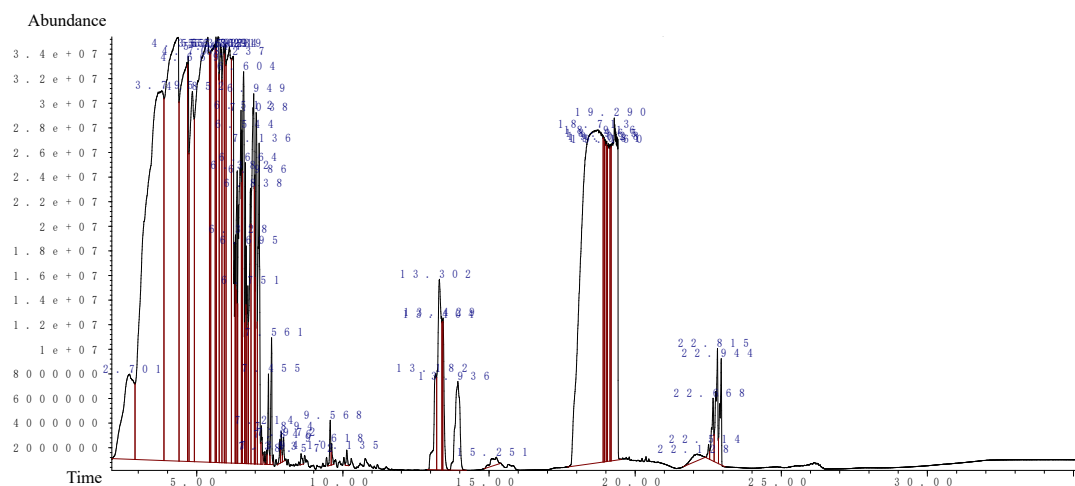

Figure 7 GC analysis of Experimental group 4

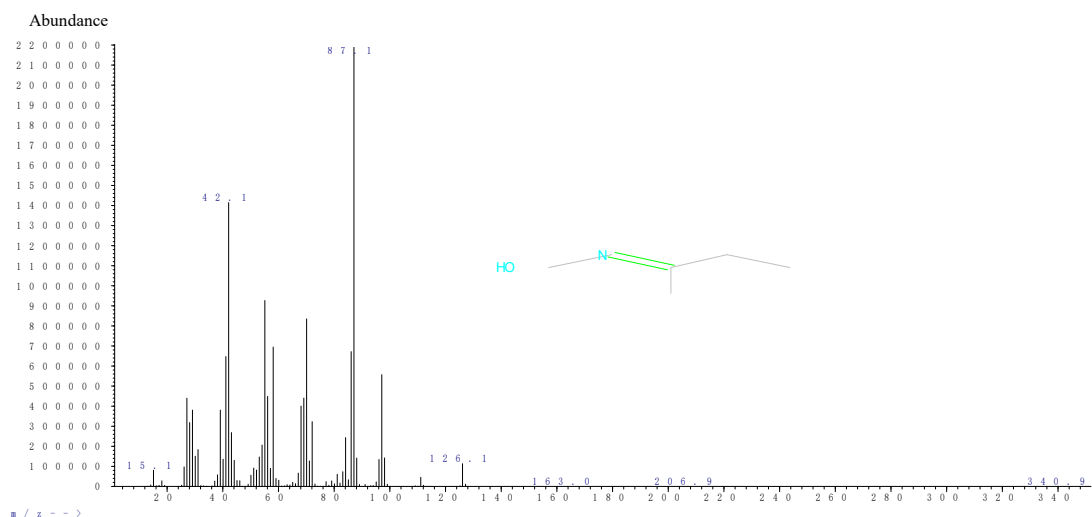

Figure 8 MS of Experimental group 4

| Peak | R.T.  | Area% | Material                    | Reference | CAS         | Mass |
|------|-------|-------|-----------------------------|-----------|-------------|------|
| 1    | 2.703 | 1.90  |                             |           |             |      |
|      |       |       | 2-Pentene, 3-methyl-        | 1466      | 000922-61-2 | 64   |
|      |       |       | 2-Pentene, 3-methyl-, (Z)-  | 1506      | 000922-62-3 | 64   |
|      |       |       | Pentane, 3-methylene-       | 1488      | 000760-21-4 | 62   |
| 2    | 3.797 | 13.20 |                             |           |             |      |
|      |       |       | Hexane, 3-methyl-           | 3944      | 000589-34-4 | 59   |
|      |       |       | Heptane                     | 3943      | 000142-82-5 | 47   |
|      |       |       | Hexane, 3,3,4-trimethyl-    | 12579     | 016747-31-2 | 47   |
| 3    | 4.367 | 10.23 |                             |           |             |      |
|      |       |       | Cycloheptane                | 3275      | 000291-64-5 | 50   |
|      |       |       | 1-Heptene                   | 3269      | 000592-76-7 | 46   |
|      |       |       | Cyclohexane, methyl-        | 3314      | 000108-87-2 | 43   |
| 4    | 4.670 | 5.47  |                             |           |             |      |
|      |       |       | Cyclohexane, methyl-        | 3312      | 000108-87-2 | 52   |
|      |       |       | 2-Pentene, 2,3-dimethyl-    | 3323      | 010574-37-5 | 43   |
|      |       |       | Cycloheptane                | 3274      | 000291-64-5 | 43   |
| 5    | 4.711 | 0.98  |                             |           |             |      |
|      |       |       | Cyclohexane, methyl-        | 3312      | 000108-87-2 | 47   |
|      |       |       | 1-Pentene, 2,3-dimethyl-    | 3333      | 003404-72-6 | 43   |
|      |       |       | 3-Penten-2-one, 4-methyl-   | 3203      | 000141-79-7 | 38   |
| 6    | 4.855 | 3.09  |                             |           |             |      |
|      |       |       | Cyclopentane, 1,3-dimethyl- | 3364      | 002453-00-1 | 46   |

|    |       |       |                                                               |       |             |    |
|----|-------|-------|---------------------------------------------------------------|-------|-------------|----|
|    |       |       | Cyclopentane, 1,2,3-trimethyl-, (1.alpha.,2.alpha.,3.alpha.)- | 6772  | 002613-69-6 | 43 |
|    |       |       | 1-Hexene, 4-ethyl-                                            | 6593  | 016746-85-3 | 41 |
| 7  | 5.379 | 10.09 |                                                               |       |             |    |
|    |       |       | Octane, 4-methyl-                                             | 12531 | 002216-34-4 | 43 |
|    |       |       | Hexane, 2,3,4-trimethyl-                                      | 12578 | 000921-47-1 | 43 |
|    |       |       | Hexane, 2,3,4-trimethyl-                                      | 12570 | 000921-47-1 | 43 |
| 8  | 5.445 | 0.95  |                                                               |       |             |    |
|    |       |       | Heptane, 3,4,5-trimethyl-                                     | 18959 | 020278-89-1 | 43 |
|    |       |       | Hexane, 2,3,4-trimethyl-                                      | 12578 | 000921-47-1 | 38 |
|    |       |       | Heptane, 3-methyl-                                            | 7552  | 000589-81-1 | 38 |
| 9  | 5.610 | 3.07  |                                                               |       |             |    |
|    |       |       | Octane                                                        | 7547  | 000111-65-9 | 43 |
|    |       |       | Heptane, 2-methyl-                                            | 7560  | 000592-27-8 | 41 |
|    |       |       | Octane, 4-methyl-                                             | 12531 | 002216-34-4 | 38 |
| 10 | 5.661 | 0.89  |                                                               |       |             |    |
|    |       |       | Cyclopentane, 1,3-dimethyl-, cis-                             | 3377  | 002532-58-3 | 80 |
|    |       |       | Heptane, 3-methyl-                                            | 7552  | 000589-81-1 | 50 |
|    |       |       | Octane                                                        | 7548  | 000111-65-9 | 49 |
| 11 | 5.733 | 1.95  |                                                               |       |             |    |
|    |       |       | Heptane, 3,4,5-trimethyl-                                     | 18959 | 020278-89-1 | 49 |
|    |       |       | Heptane, 3-methyl-                                            | 7556  | 000589-81-1 | 49 |
|    |       |       | Cyclobutane, 1,2-diethyl-, trans-                             | 6747  | 019341-98-1 | 38 |
| 12 | 5.820 | 1.92  |                                                               |       |             |    |
|    |       |       | Cyclohexane, 1,2-dimethyl-, trans-                            | 6752  | 006876-23-9 | 70 |
|    |       |       | Cyclohexane, 1,2-dimethyl-, trans-                            | 6756  | 006876-23-9 | 70 |
|    |       |       | Cyclohexane, 1,2-dimethyl-, trans-                            | 6757  | 006876-23-9 | 64 |
| 13 | 5.923 | 1.59  |                                                               |       |             |    |
|    |       |       | Cyclopentane, 1-ethyl-2-methyl-, cis-                         | 6763  | 000930-89-2 | 90 |
|    |       |       | Cyclopentane, 1-ethyl-2-methyl-                               | 6730  | 003726-46-3 | 86 |
|    |       |       | Cyclopentane, 1-ethyl-2-methyl-, cis-                         | 6761  | 000930-89-2 | 86 |
| 14 | 5.974 | 1.21  |                                                               |       |             |    |
|    |       |       | Hexyl octyl ether                                             | 70362 | 017071-54-4 | 64 |
|    |       |       | Octane                                                        | 7548  | 000111-65-9 | 52 |
|    |       |       | Cyclopentane, 1-ethyl-2-methyl-, cis-                         | 6763  | 000930-89-2 | 46 |

|    |       |      |                                           |       |                |
|----|-------|------|-------------------------------------------|-------|----------------|
| 15 | 6.118 | 3.71 |                                           |       |                |
|    |       |      | Octane                                    | 7548  | 000111-65-9 83 |
|    |       |      | Pentane, 3-ethyl-2-methyl-                | 7595  | 000609-26-7 58 |
|    |       |      | Octane                                    | 7546  | 000111-65-9 50 |
| 16 | 6.236 | 1.97 |                                           |       |                |
|    |       |      | Octane                                    | 7548  | 000111-65-9 87 |
|    |       |      | Octane                                    | 7546  | 000111-65-9 74 |
|    |       |      | Heptane, 2,4-dimethyl-                    | 12548 | 002213-23-2 64 |
| 17 | 6.329 | 0.31 |                                           |       |                |
|    |       |      | Heptane, 5-ethyl-2,2,3-trimethyl-         | 37516 | 062199-06-8 50 |
|    |       |      | Pentane, 3-ethyl-2,2-dimethyl-            | 12608 | 016747-32-3 50 |
|    |       |      | Hexane, 2,2,5,5-tetramethyl-              | 18980 | 001071-81-4 43 |
| 18 | 6.380 | 0.65 |                                           |       |                |
|    |       |      | Heptane, 2,3-dimethyl-                    | 12557 | 003074-71-3 58 |
|    |       |      | Heptane, 2,3-dimethyl-                    | 12547 | 003074-71-3 58 |
|    |       |      | Heptane, 2,4-dimethyl-                    | 12559 | 002213-23-2 53 |
| 19 | 6.513 | 1.72 |                                           |       |                |
|    |       |      | Cyclooctane                               | 6564  | 000292-64-8 46 |
|    |       |      | Caprolactam                               | 6857  | 000105-60-2 38 |
|    |       |      | Cyclopentane, 1-ethyl-2-methyl-, c<br>is- | 6764  | 000930-89-2 25 |
| 20 | 6.544 | 0.55 |                                           |       |                |
|    |       |      | Cyclopentane, propyl-                     | 6632  | 002040-96-2 49 |
|    |       |      | Cyclooctane                               | 6564  | 000292-64-8 42 |
|    |       |      | 3-Octene, (E)-                            | 6574  | 014919-01-8 38 |
| 21 | 6.606 | 1.18 |                                           |       |                |
|    |       |      | Heptane, 3,5-dimethyl-                    | 12549 | 000926-82-9 46 |
|    |       |      | Heptane, 2,5-dimethyl-                    | 12563 | 002216-30-0 30 |
|    |       |      | Heptane, 3,5-dimethyl-                    | 12566 | 000926-82-9 27 |
| 22 | 6.662 | 0.48 |                                           |       |                |
|    |       |      | Cyclohexane, 1,1,3-trimethyl-             | 11475 | 003073-66-3 64 |
|    |       |      | Cyclohexane, 1,1,3-trimethyl-             | 11476 | 003073-66-3 58 |
|    |       |      | Cyclohexane, 1,1,3-trimethyl-             | 11460 | 003073-66-3 47 |
| 23 | 6.693 | 0.30 |                                           |       |                |
|    |       |      | 2-Butanone, oxime                         | 1864  | 000096-29-7 46 |
|    |       |      | 2-Butanone, oxime                         | 1865  | 000096-29-7 46 |

|    |       |      |                                   |        |              |    |
|----|-------|------|-----------------------------------|--------|--------------|----|
|    |       |      | 2-Butanone, oxime                 | 1863   | 000096-29-7  | 46 |
| 24 | 6.750 | 0.40 |                                   |        |              |    |
|    |       |      | 2-Butanone, oxime                 | 1865   | 000096-29-7  | 86 |
|    |       |      | 2-Butanone, oxime                 | 1864   | 000096-29-7  | 70 |
|    |       |      | Cyclobutane, methyl-              | 570    | 000598-61-8  | 38 |
| 25 | 6.837 | 0.87 |                                   |        |              |    |
|    |       |      | 2-Butanone, oxime                 | 1864   | 000096-29-7  | 60 |
|    |       |      | 2-Butanone, oxime                 | 1863   | 000096-29-7  | 60 |
|    |       |      | 2-Butanone, oxime                 | 1865   | 000096-29-7  | 60 |
| 26 | 6.950 | 1.81 |                                   |        |              |    |
|    |       |      | Benzene, 1,3-dimethyl-            | 5055   | 000108-38-3  | 44 |
|    |       |      | Ethylbenzene                      | 5042   | 000100-41-4  | 40 |
|    |       |      | 1,3-Dioxolane, 2-ethyl-2-methyl-  | 8092   | 000126-39-6  | 27 |
| 27 | 6.986 | 0.39 |                                   |        |              |    |
|    |       |      | 2-Butanone, oxime                 | 1864   | 000096-29-7  | 83 |
|    |       |      | 2-Butanone, oxime                 | 1865   | 000096-29-7  | 58 |
|    |       |      | 1-Butanamine, N-nitroso-N-propyl- | 20472  | 025413-64-3  | 43 |
| 28 | 7.037 | 0.97 |                                   |        |              |    |
|    |       |      | Ethanone, 1-(3-indoliziny)-       | 29867  | 025314-91-4  | 27 |
|    |       |      | 2,3,5,6-Tetramethylphenylcyanide  | 29924  | 002571-53-1  | 27 |
|    |       |      | Ethanone, 1-(1H-indol-3-yl)-      | 29866  | 000703-80-0  | 27 |
| 29 | 7.135 | 1.06 |                                   |        |              |    |
|    |       |      | p-Xylene                          | 5032   | 000106-42-3  | 92 |
|    |       |      | p-Xylene                          | 5030   | 000106-42-3  | 92 |
|    |       |      | o-Xylene                          | 5039   | 000095-47-6  | 92 |
| 30 | 7.217 | 0.07 |                                   |        |              |    |
|    |       |      | Cyclohexane, butyl-               | 17749  | 001678-93-9  | 43 |
|    |       |      | Cyclohexane, ethyl-               | 6602   | 001678-91-7  | 43 |
|    |       |      | Cyclohexane, butyl-               | 17747  | 001678-93-9  | 38 |
| 31 | 7.335 | 0.02 |                                   |        |              |    |
|    |       |      | Cyclopentane, 1-methyl-2-propyl-  | 11484  | 003728-57-2  | 92 |
|    |       |      | 4-Heptafluorobutyryloxyhexadecane | 205111 | 1000282-97-2 | 72 |
|    |       |      | 1-Hexene, 3-methyl-               | 3299   | 003404-61-3  | 55 |
| 32 | 7.392 | 0.02 |                                   |        |              |    |
|    |       |      | cis-1-Ethyl-3-methyl-cyclohexane  | 11486  | 019489-10-2  | 92 |

|    |       |      |                                                |        |              |    |
|----|-------|------|------------------------------------------------|--------|--------------|----|
|    |       |      | 1-Ethyl-3-methylcyclohexane (c,t)              | 11488  | 003728-55-0  | 91 |
|    |       |      | 1-Ethyl-4-methylcyclohexane                    | 11451  | 003728-56-1  | 83 |
| 33 | 7.453 | 0.16 |                                                |        |              |    |
|    |       |      | p-Xylene                                       | 5033   | 000106-42-3  | 95 |
|    |       |      | o-Xylene                                       | 5031   | 000095-47-6  | 95 |
|    |       |      | p-Xylene                                       | 5032   | 000106-42-3  | 95 |
| 34 | 7.561 | 0.25 |                                                |        |              |    |
|    |       |      | Nonane                                         | 12526  | 000111-84-2  | 95 |
|    |       |      | Nonane                                         | 12527  | 000111-84-2  | 95 |
|    |       |      | Nonane                                         | 12528  | 000111-84-2  | 90 |
| 35 | 7.844 | 0.04 |                                                |        |              |    |
|    |       |      | Cyclopentane, 1,2,3,4,5-pentamethyl-           | 17833  | 1000152-79-7 | 64 |
|    |       |      | 1H-Imidazole, 4,5-dihydro-2-methyl             | 1365   | 000534-26-9  | 53 |
|    |       |      | 2-Butenal, 3-methyl-                           | 1408   | 000107-86-8  | 47 |
| 36 | 7.895 | 0.06 |                                                |        |              |    |
|    |       |      | Cyclohexane, 1-methyl-4-(1-methylethyl)-, cis- | 17852  | 006069-98-3  | 58 |
|    |       |      | trans-2-Oxabicyclo[4.4.0]decane                | 18507  | 059958-46-2  | 53 |
|    |       |      | Sulfurous acid, cyclohexylmethyl undecyl ester | 160050 | 1000309-21-9 | 53 |
| 37 | 7.972 | 0.05 |                                                |        |              |    |
|    |       |      | Cyclopentane, 1,2,3,4,5-pentamethyl-           | 17833  | 1000152-79-7 | 52 |
|    |       |      | 2,3,4,5-Tetrahydropyridazine                   | 1349   | 000694-06-4  | 50 |
|    |       |      | 2-Cyclohexen-1-ol, 2,4,4-trimethyl             | 18535  | 073741-61-4  | 49 |
| 38 | 8.573 | 0.03 |                                                |        |              |    |
|    |       |      | 2-Pentene, 2,3-dimethyl-                       | 3323   | 010574-37-5  | 46 |
|    |       |      | 2-Dodecylcyclobutanone                         | 88717  | 035493-46-0  | 43 |
|    |       |      | 2-Pentene, 3,4-dimethyl-, (E)-                 | 3370   | 004914-92-5  | 43 |
| 39 | 9.569 | 0.09 |                                                |        |              |    |
|    |       |      | Cyclohexane, 1,1,3,5-tetramethyl-, cis-        | 17837  | 050876-32-9  | 43 |
|    |       |      | 3-Heptene, 2,2,3,5,6-pentamethyl-              | 36065  | 116164-06-8  | 43 |
|    |       |      | 2,2,4-Trimethyl-3-hexene                       | 11429  | 059643-72-0  | 43 |
| 40 | 9.620 | 0.04 |                                                |        |              |    |
|    |       |      | Cyclohexane, 1-ethyl-1,4-dimethyl-             | 17850  | 062238-32-8  | 53 |

|    |        |      |                                                         |        |              |    |  |
|----|--------|------|---------------------------------------------------------|--------|--------------|----|--|
|    |        |      | , trans-                                                |        |              |    |  |
|    |        |      | 3-Isopropyl-5-methyl-hex-4-en-2-on                      | 26309  | 077142-85-9  | 50 |  |
|    |        |      | Cyclooctane, ethyl-                                     | 17748  | 013152-02-8  | 50 |  |
| 41 | 10.134 | 0.04 |                                                         |        |              |    |  |
|    |        |      | 3-Hexene, 2,3-dimethyl-                                 | 6657   | 007145-23-5  | 64 |  |
|    |        |      | 3-Ethyl-4-methyl-2-pentene                              | 6670   | 019780-68-8  | 45 |  |
|    |        |      | 2,4-Dimethyl-3-hexene(c,t)                              | 6669   | 1000118-16-4 | 45 |  |
| 42 | 13.179 | 0.53 |                                                         |        |              |    |  |
|    |        |      | Propyl aldoxime, 2-methyl-, anti-                       | 1892   | 005775-73-5  | 27 |  |
|    |        |      | Azetidine, n-propyl-                                    | 3511   |              | 16 |  |
|    |        |      | Propyl aldoxime, 2-methyl-, syn-                        | 1891   | 005780-39-2  | 16 |  |
| 43 | 13.302 | 1.31 |                                                         |        |              |    |  |
|    |        |      | 1,3-Cyclobutanedione, 2,2,4,4-tetr<br>amethyl-          | 18281  | 000933-52-8  | 30 |  |
|    |        |      | Propyl aldoxime, 2-methyl-, anti-                       | 1892   | 005775-73-5  | 27 |  |
|    |        |      | Valine, N-methyl-N-methoxycarbonyl<br>-, isohexyl ester | 115877 | 1000328-93-3 | 22 |  |
| 44 | 13.405 | 0.21 |                                                         |        |              |    |  |
|    |        |      | Valine, N-methyl-N-methoxycarbonyl<br>-, isohexyl ester | 115877 | 1000328-93-3 | 22 |  |
|    |        |      | 1H-Indole-3-acetamide, N,N-dimethy<br>l-.alpha.-oxo-    | 71452  | 029095-44-1  | 18 |  |
|    |        |      | Propyl aldoxime, 2-methyl-, syn-                        | 1891   | 005780-39-2  | 16 |  |
| 45 | 13.431 | 0.41 |                                                         |        |              |    |  |
|    |        |      | Propyl aldoxime, 2-methyl-, anti-                       | 1892   | 005775-73-5  | 27 |  |
|    |        |      | Valine, N-methyl-N-methoxycarbonyl<br>-, isohexyl ester | 115877 | 1000328-93-3 | 22 |  |
|    |        |      | Propyl aldoxime, 2-methyl-, syn-                        | 1891   | 005780-39-2  | 16 |  |
| 46 | 13.934 | 0.82 |                                                         |        |              |    |  |
|    |        |      | Azetidine, n-propyl-                                    | 3511   |              | 39 |  |
|    |        |      | Cyclohexanamine, N-methyl-N-nitros<br>o-                | 19293  | 005432-28-0  | 38 |  |
|    |        |      | 4-(Pyrrolidin-2-ylcarbonyl)morphol<br>ine               | 48074  | 1000305-37-7 | 9  |  |
| 47 | 15.249 | 0.11 |                                                         |        |              |    |  |
|    |        |      | 1-Methoxy-2,3-cis-dimethylaziridin<br>e (sin)           | 4101   | 061593-25-7  | 47 |  |



|    |        |       |                                                             |        |              |    |
|----|--------|-------|-------------------------------------------------------------|--------|--------------|----|
|    |        |       | Azetidine, 1,1'-methylenebis-                               | 11113  | 038455-24-2  | 47 |
|    |        |       | 1-Methoxy-2,3-trans-dimethylaziridine                       | 4100   | 1000283-23-4 | 28 |
| 48 | 18.715 | 13.51 |                                                             |        |              |    |
|    |        |       | Decyl alcohol, tert-butyldimethylsilyl ether                | 115281 | 1000333-00-5 | 22 |
|    |        |       | Azetidine, n-propyl-                                        | 3511   |              | 16 |
|    |        |       | 1-Methoxy-2,3-cis-dimethylaziridine (sin)                   | 4101   | 061593-25-7  | 12 |
| 49 | 18.915 | 0.77  |                                                             |        |              |    |
|    |        |       | Azetidine, n-propyl-                                        | 3511   |              | 25 |
|    |        |       | 1-Methoxy-2,3-cis-dimethylaziridine (sin)                   | 4101   | 061593-25-7  | 17 |
|    |        |       | 2,4,6(1H,3H,5H)-Pyrimidinetrione, 5-(2-pyridinylmethylene)- | 72128  | 068160-61-2  | 10 |
| 50 | 18.967 | 0.92  |                                                             |        |              |    |
|    |        |       | Azetidine, n-propyl-                                        | 3511   |              | 25 |
|    |        |       | 1-Methoxy-2,3-cis-dimethylaziridine (sin)                   | 4101   | 061593-25-7  | 17 |
|    |        |       | Nonanoic acid, tert-butyldimethylsilyl ester                | 115100 | 104255-73-4  | 10 |
| 51 | 19.028 | 0.69  |                                                             |        |              |    |
|    |        |       | Azetidine, n-propyl-                                        | 3511   |              | 25 |
|    |        |       | Nonanoic acid, tert-butyldimethylsilyl ester                | 115100 | 104255-73-4  | 10 |
|    |        |       | (S)-(+)-2-Pyrrolidinemethanol                               | 4078   | 023356-96-9  | 10 |
| 52 | 19.080 | 1.31  |                                                             |        |              |    |
|    |        |       | Azetidine, n-propyl-                                        | 3511   |              | 25 |
|    |        |       | (S)-(+)-2-Pyrrolidinemethanol                               | 4078   | 023356-96-9  | 10 |
|    |        |       | Decyl alcohol, tert-butyldimethylsilyl ether                | 115281 | 1000333-00-5 | 10 |
| 53 | 19.162 | 0.59  |                                                             |        |              |    |
|    |        |       | 1-Oxa-3,4-diazacyclopentadiene                              | 494    | 000288-99-3  | 35 |
|    |        |       | Azetidine, n-propyl-                                        | 3511   |              | 25 |
|    |        |       | (S)-(+)-2-Pyrrolidinemethanol                               | 4078   | 023356-96-9  | 10 |
| 54 | 19.290 | 3.87  |                                                             |        |              |    |
|    |        |       | Azetidine, n-propyl-                                        | 3511   |              | 17 |

|    |        |                                                                                                                      |                  |                             |          |
|----|--------|----------------------------------------------------------------------------------------------------------------------|------------------|-----------------------------|----------|
|    |        | Decyl alcohol, tert-butyldimethylsilyl ether                                                                         | 115281           | 1000333-00-5                | 14       |
|    |        | L-Proline, ethyl ester                                                                                               | 19969            | 005817-26-5                 | 10       |
| 55 | 22.130 | 0.13                                                                                                                 |                  |                             |          |
|    |        | 1-Oxa-3,4-diazacyclopentadiene                                                                                       | 494              | 000288-99-3                 | 35       |
|    |        | 1-Methoxy-2,3-cis-dimethylaziridine (sin)                                                                            | 4101             | 061593-25-7                 | 17       |
|    |        | 2,4-Dinitro-11-phenyl-5H-dibenzo[b,e][1,4]diazepine                                                                  | 177244           | 071354-26-2                 | 12       |
| 56 | 22.515 | 0.04                                                                                                                 |                  |                             |          |
|    |        | 3-Amino-6-nitro-4-phenylsulfanyl-benzo[b]thiophene-2-carboxylic acid methyl ester                                    | 177075           | 1000275-36-3                | 32       |
|    |        | Benzoic acid, 4-(3,4-dihydro-2,4-dioxo-2H-pyrimido[4,5-b]quinolin-10-yl)-, ethyl ester                               | 177893           | 317326-96-8                 | 27       |
|    |        | 1-Methoxy-2,3-cis-dimethylaziridine (sin)                                                                            | 4101             | 061593-25-7                 | 25       |
| 57 | 22.669 | 0.24                                                                                                                 |                  |                             |          |
|    |        | 3-Amino-6-nitro-4-phenylsulfanyl-benzo[b]thiophene-2-carboxylic acid methyl ester                                    | 177075           | 1000275-36-3                | 50       |
|    |        | Thianthrene, octafluoro-2-Quinolinecarboxylic acid, 4-[(tert-butyldimethylsilyl)oxy]-, tert-butyldimethylsilyl ester | 176996<br>200507 | 016012-83-2<br>1000221-71-1 | 25<br>23 |
| 58 | 22.813 | 0.45                                                                                                                 |                  |                             |          |
|    |        | Thianthrene, octafluoro-2-Quinolinecarboxylic acid, 4-[(tert-butyldimethylsilyl)oxy]-, tert-butyldimethylsilyl ester | 176996<br>200507 | 016012-83-2<br>1000221-71-1 | 25<br>23 |
|    |        | 4-[5-(4-Methyl-5-methylsulfanyl-4H-[1,2,4]triazol-3-yl)-thiophene-2-sulfonyl]-morpholine                             | 177000           | 1000296-67-3                | 9        |
| 59 | 22.946 | 0.32                                                                                                                 |                  |                             |          |
|    |        | Thianthrene, octafluoro-2-Quinolinecarboxylic acid, 4-[(tert-butyldimethylsilyl)oxy]-, tert-butyldimethylsilyl ester | 176996<br>200507 | 016012-83-2<br>1000221-71-1 | 25<br>23 |

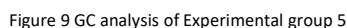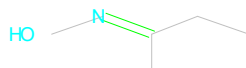 $m/z \rightarrow$ 

| Peak | R.T.  | Area% | Material                   | Reference | CAS         | Mass |
|------|-------|-------|----------------------------|-----------|-------------|------|
| 1    | 2.672 | 1.92  |                            |           |             |      |
|      |       |       | 2-Pentene, 3-methyl-, (Z)- | 1506      | 000922-62-3 | 64   |
|      |       |       | 2-Pentene, 3-methyl-       | 1466      | 000922-61-2 | 64   |
|      |       |       | 2-Pentene, 3-methyl-, (Z)- | 1508      | 000922-62-3 | 62   |
| 2    | 3.684 | 10.04 |                            |           |             |      |
|      |       |       | Heptane                    | 3943      | 000142-82-5 | 52   |
|      |       |       | Pentane, 2,3-dimethyl-     | 3962      | 000565-59-3 | 49   |
|      |       |       | Butane, 2,2-dimethyl-      | 1826      | 000075-83-2 | 38   |
| 3    | 3.802 | 3.27  |                            |           |             |      |
|      |       |       | Hexane, 3-methyl-          | 3944      | 000589-34-4 | 59   |
|      |       |       | Heptane                    | 3943      | 000142-82-5 | 58   |

|    |       |                                    |       |             |    |
|----|-------|------------------------------------|-------|-------------|----|
|    |       | Heptane                            | 3941  | 000142-82-5 | 53 |
| 4  | 4.357 | 9.87                               |       |             |    |
|    |       | Cycloheptane                       | 3275  | 000291-64-5 | 64 |
|    |       | 1-Heptene                          | 3269  | 000592-76-7 | 46 |
|    |       | Heptane                            | 3941  | 000142-82-5 | 46 |
| 5  | 4.660 | 5.60                               |       |             |    |
|    |       | Cyclohexane, methyl-               | 3312  | 000108-87-2 | 52 |
|    |       | 3-Penten-2-one, 4-methyl-          | 3203  | 000141-79-7 | 43 |
|    |       | 2-Pentene, 2,3-dimethyl-           | 3323  | 010574-37-5 | 43 |
| 6  | 4.701 | 0.85                               |       |             |    |
|    |       | Cyclohexane, methyl-               | 3312  | 000108-87-2 | 47 |
|    |       | 1-Pentene, 2,3-dimethyl-           | 3333  | 003404-72-6 | 43 |
|    |       | 1-Heptene                          | 3269  | 000592-76-7 | 38 |
| 7  | 4.844 | 3.15                               |       |             |    |
|    |       | Cyclopentane, 1,3-dimethyl-        | 3364  | 002453-00-1 | 46 |
|    |       | Cyclopentane, 1,2,3-trimethyl-, (1 | 6770  | 002613-69-6 | 43 |
|    |       | .alpha.,2.alpha.,3.alpha.)-        |       |             |    |
|    |       | 1-Hexene, 4-ethyl-                 | 6593  | 016746-85-3 | 41 |
| 8  | 5.373 | 9.78                               |       |             |    |
|    |       | Octane, 4-methyl-                  | 12531 | 002216-34-4 | 46 |
|    |       | Hexane, 2,3,4-trimethyl-           | 12570 | 000921-47-1 | 43 |
|    |       | Hexane, 2,3,4-trimethyl-           | 12578 | 000921-47-1 | 43 |
| 9  | 5.599 | 4.44                               |       |             |    |
|    |       | Octane                             | 7547  | 000111-65-9 | 43 |
|    |       | Heptane, 2-methyl-                 | 7560  | 000592-27-8 | 41 |
|    |       | Hexane, 3-ethyl-                   | 7551  | 000619-99-8 | 38 |
| 10 | 5.646 | 0.66                               |       |             |    |
|    |       | Octane                             | 7548  | 000111-65-9 | 62 |
|    |       | Octane                             | 7546  | 000111-65-9 | 58 |
|    |       | Heptane, 3-methyl-                 | 7552  | 000589-81-1 | 55 |
| 11 | 5.733 | 1.86                               |       |             |    |
|    |       | Hexane, 3-ethyl-                   | 7550  | 000619-99-8 | 52 |
|    |       | Heptane, 3-methyl-                 | 7556  | 000589-81-1 | 49 |
|    |       | Heptane, 3,4,5-trimethyl-          | 18959 | 020278-89-1 | 49 |
| 12 | 5.815 | 1.96                               |       |             |    |

|    |       |      |                                       |       |             |    |
|----|-------|------|---------------------------------------|-------|-------------|----|
|    |       |      | Cyclohexane, 1,2-dimethyl-, trans-    | 6752  | 006876-23-9 | 89 |
|    |       |      | Cyclohexane, 1,2-dimethyl-            | 6671  | 000583-57-3 | 76 |
|    |       |      | Cyclohexane, 1,2-dimethyl-, trans-    | 6756  | 006876-23-9 | 76 |
| 13 | 5.913 | 1.65 |                                       |       |             |    |
|    |       |      | Cyclopentane, 1-ethyl-2-methyl-, cis- | 6763  | 000930-89-2 | 90 |
|    |       |      | Cyclopentane, 1-ethyl-2-methyl-       | 6730  | 003726-46-3 | 86 |
|    |       |      | Cyclopentane, 1-ethyl-2-methyl-, cis- | 6761  | 000930-89-2 | 86 |
| 14 | 5.964 | 1.17 |                                       |       |             |    |
|    |       |      | Octane                                | 7548  | 000111-65-9 | 52 |
|    |       |      | Cyclopentane, 1-ethyl-2-methyl-       | 6730  | 003726-46-3 | 46 |
|    |       |      | Cyclopentane, 1-ethyl-2-methyl-, cis- | 6763  | 000930-89-2 | 46 |
| 15 | 6.118 | 4.08 |                                       |       |             |    |
|    |       |      | Octane                                | 7548  | 000111-65-9 | 83 |
|    |       |      | Heptane, 2,4-dimethyl-                | 12548 | 002213-23-2 | 60 |
|    |       |      | Pentane, 3-ethyl-2-methyl-            | 7595  | 000609-26-7 | 58 |
| 16 | 6.205 | 1.40 |                                       |       |             |    |
|    |       |      | Octane                                | 7548  | 000111-65-9 | 87 |
|    |       |      | Heptane, 2,3-dimethyl-                | 12558 | 003074-71-3 | 64 |
|    |       |      | Octane                                | 7546  | 000111-65-9 | 58 |
| 17 | 6.293 | 0.19 |                                       |       |             |    |
|    |       |      | Pentane, 3-methylene-                 | 1488  | 000760-21-4 | 38 |
|    |       |      | Hexane, 2,3,5-trimethyl-              | 12581 | 001069-53-0 | 25 |
|    |       |      | 2-Pentene, 3-methyl-, (Z)-            | 1507  | 000922-62-3 | 25 |
| 18 | 6.318 | 0.31 |                                       |       |             |    |
|    |       |      | Heptane, 5-ethyl-2,2,3-trimethyl-     | 37516 | 062199-06-8 | 50 |
|    |       |      | Hexane, 2,2,5,5-tetramethyl-          | 18981 | 001071-81-4 | 43 |
|    |       |      | Heptane, 2,2-dimethyl-                | 12569 | 001071-26-7 | 43 |
| 19 | 6.370 | 0.66 |                                       |       |             |    |
|    |       |      | Heptane, 2,3-dimethyl-                | 12547 | 003074-71-3 | 58 |
|    |       |      | Heptane, 2,3-dimethyl-                | 12557 | 003074-71-3 | 58 |
|    |       |      | Heptane, 2,4-dimethyl-                | 12548 | 002213-23-2 | 53 |
| 20 | 6.503 | 1.73 |                                       |       |             |    |
|    |       |      | Cyclooctane                           | 6564  | 000292-64-8 | 46 |
|    |       |      | Caprolactam                           | 6857  | 000105-60-2 | 38 |
|    |       |      | Cyclopentane, 1-ethyl-2-methyl-, cis- | 6764  | 000930-89-2 | 25 |

|    |       |      |                                           |       |                 |
|----|-------|------|-------------------------------------------|-------|-----------------|
| 21 | 6.534 | 0.55 |                                           |       |                 |
|    |       |      | 3-Octene, (E)-                            | 6566  | 014919-01-8 50  |
|    |       |      | Cyclopentane, propyl-                     | 6632  | 002040-96-2 49  |
|    |       |      | trans-1-Butyl-2-methylcyclopropane        | 6749  | 038851-70-6 46  |
| 22 | 6.596 | 1.18 |                                           |       |                 |
|    |       |      | Heptane, 3,5-dimethyl-                    | 12549 | 000926-82-9 41  |
|    |       |      | Cyclohexane, ethyl-                       | 6598  | 001678-91-7 30  |
|    |       |      | Cyclohexane, ethyl-                       | 6601  | 001678-91-7 30  |
| 23 | 6.657 | 0.50 |                                           |       |                 |
|    |       |      | Cyclohexane, 1,1,3-trimethyl-             | 11476 | 003073-66-3 58  |
|    |       |      | Cyclohexane, 1,1,3-trimethyl-             | 11475 | 003073-66-3 52  |
|    |       |      | Cyclohexane, 1,1,3-trimethyl-             | 11460 | 003073-66-3 50  |
| 24 | 6.688 | 0.30 |                                           |       |                 |
|    |       |      | 2-Butanone, oxime                         | 1863  | 000096-29-7 46  |
|    |       |      | 2-Butanone, oxime                         | 1864  | 000096-29-7 46  |
|    |       |      | 2-Butanone, oxime                         | 1865  | 000096-29-7 46  |
| 25 | 6.745 | 0.41 |                                           |       |                 |
|    |       |      | 2-Butanone, oxime                         | 1865  | 000096-29-7 86  |
|    |       |      | 2-Butanone, oxime                         | 1864  | 000096-29-7 64  |
|    |       |      | Cyclobutane, methyl-                      | 570   | 000598-61-8 38  |
| 26 | 6.832 | 0.88 |                                           |       |                 |
|    |       |      | 2-Butanone, oxime                         | 1865  | 000096-29-7 60  |
|    |       |      | 2-Butanone, oxime                         | 1864  | 000096-29-7 60  |
|    |       |      | 2-Butanone, oxime                         | 1863  | 000096-29-7 60  |
| 27 | 6.945 | 1.85 |                                           |       |                 |
|    |       |      | Benzene, 1,3-dimethyl-                    | 5055  | 000108-38-3 44  |
|    |       |      | Ethylbenzene                              | 5042  | 000100-41-4 40  |
|    |       |      | 1,3-Dioxolane, 2-ethyl-2-methyl-          | 8092  | 000126-39-6 27  |
| 28 | 6.996 | 0.56 |                                           |       |                 |
|    |       |      | 2-Butanone, oxime                         | 1864  | 000096-29-7 83  |
|    |       |      | 2-Butanone, oxime                         | 1865  | 000096-29-7 64  |
|    |       |      | Cyclopentane                              | 554   | 000287-92-3 30  |
| 29 | 7.032 | 0.87 |                                           |       |                 |
|    |       |      | 1-Isopropyl-1H-indole                     | 29907 | 1000322-51-9 22 |
|    |       |      | Ethanone, 1-(1H-indol-3-yl)-              | 29866 | 000703-80-0 22  |
|    |       |      | 1-Methoxy-2,3-cis-dimethylaziridine (sin) | 4101  | 061593-25-7 22  |

|    |       |      |                                                    |        |                 |
|----|-------|------|----------------------------------------------------|--------|-----------------|
| 30 | 7.130 | 1.03 |                                                    |        |                 |
|    |       |      | Benzene, 1,3-dimethyl-                             | 5058   | 000108-38-3 92  |
|    |       |      | o-Xylene                                           | 5039   | 000095-47-6 92  |
|    |       |      | p-Xylene                                           | 5030   | 000106-42-3 92  |
| 31 | 7.212 | 0.08 |                                                    |        |                 |
|    |       |      | 1,6-Octadiene, 5,7-dimethyl-, (R)-                 | 16740  | 085006-04-8 53  |
|    |       |      | 1,7-Octadiene, 2,3,3-trimethyl-                    | 25014  | 1000150-47-7 50 |
|    |       |      | Cyclohexane, ethyl-                                | 6602   | 001678-91-7 47  |
| 32 | 7.330 | 0.02 |                                                    |        |                 |
|    |       |      | Cyclopentane, 1-methyl-2-propyl-                   | 11484  | 003728-57-2 92  |
|    |       |      | 5-Octadecene, (E)-                                 | 99558  | 007206-21-5 72  |
|    |       |      | 3-Heptene, 2,6-dimethyl-                           | 11433  | 002738-18-3 55  |
| 33 | 7.392 | 0.02 |                                                    |        |                 |
|    |       |      | cis-1-Ethyl-3-methyl-cyclohexane                   | 11486  | 019489-10-2 92  |
|    |       |      | 1-Ethyl-3-methylcyclohexane (c,t)                  | 11488  | 003728-55-0 91  |
|    |       |      | 1-Ethyl-4-methylcyclohexane                        | 11451  | 003728-56-1 83  |
| 34 | 7.453 | 0.18 |                                                    |        |                 |
|    |       |      | p-Xylene                                           | 5032   | 000106-42-3 95  |
|    |       |      | Benzene, 1,3-dimethyl-                             | 5055   | 000108-38-3 95  |
|    |       |      | p-Xylene                                           | 5033   | 000106-42-3 95  |
| 35 | 7.556 | 0.24 |                                                    |        |                 |
|    |       |      | Nonane                                             | 12526  | 000111-84-2 95  |
|    |       |      | Nonane                                             | 12527  | 000111-84-2 95  |
|    |       |      | Nonane                                             | 12528  | 000111-84-2 83  |
| 36 | 7.843 | 0.05 |                                                    |        |                 |
|    |       |      | Cyclopentane, 1,2,3,4,5-pentamethyl-               | 17833  | 1000152-79-7 58 |
|    |       |      | 1H-Imidazole, 4,5-dihydro-2-methyl                 | 1365   | 000534-26-9 47  |
|    |       |      | 2-Acetylpiperidine                                 | 11682  | 097073-22-8 43  |
| 37 | 7.895 | 0.06 |                                                    |        |                 |
|    |       |      | Sulfurous acid, cyclohexylmethyl h<br>exyl ester   | 106952 | 1000309-21-6 53 |
|    |       |      | Cyclohexane, 1-methyl-4-(1-methyle<br>thyl)-, cis- | 17852  | 006069-98-3 53  |
|    |       |      | Sulfurous acid, cyclohexylmethyl n<br>onyl ester   | 139611 | 1000309-21-8 53 |

|    |        |      |                                                |       |              |    |
|----|--------|------|------------------------------------------------|-------|--------------|----|
| 38 | 7.972  | 0.05 | 1-Methoxy-4,4-dimethyl-cyclohex-1-ene          | 18548 | 073741-65-8  | 50 |
|    |        |      | 2-Cyclohexen-1-ol, 2,4,4-trimethyl             | 18535 | 073741-61-4  | 49 |
|    |        |      | Cyclopentane, 1,2,3,4,5-pentamethyl-           | 17833 | 1000152-79-7 | 47 |
| 39 | 8.568  | 0.04 | 2-Pentene, 2,3-dimethyl-                       | 3323  | 010574-37-5  | 46 |
|    |        |      | 2-Pentene, 3,4-dimethyl-, (E)-                 | 3370  | 004914-92-5  | 43 |
|    |        |      | 2-Dodecylcyclobutanone                         | 88717 | 035493-46-0  | 43 |
| 40 | 8.691  | 0.02 | Cyclohexanone, 4-(1,1-dimethylethyl)-          | 26328 | 000098-53-3  | 35 |
|    |        |      | Octane, 2,3-dimethyl-                          | 18946 | 007146-60-3  | 35 |
|    |        |      | 3-Penten-2-one, 4-methyl-                      | 3203  | 000141-79-7  | 30 |
| 41 | 9.569  | 0.10 | Cyclohexane, 1,1,3,5-tetramethyl-, trans-      | 17843 | 050876-31-8  | 45 |
|    |        |      | 3-Heptene, 2,2,3,5,6-pentamethyl-              | 36065 | 116164-06-8  | 43 |
|    |        |      | Cyclohexane, 1,1,3,5-tetramethyl-, cis-        | 17837 | 050876-32-9  | 43 |
| 42 | 9.620  | 0.04 | cis,cis,cis-1-Isobutyl-2,5-dimethylcyclohexane | 36080 | 1000113-60-0 | 62 |
|    |        |      | Cyclohexane, 1,1,3-trimethyl-                  | 11475 | 003073-66-3  | 59 |
|    |        |      | Cyclohexane, 1,1,3-trimethyl-                  | 11476 | 003073-66-3  | 59 |
| 43 | 10.139 | 0.04 | 2,4-Dimethyl-3-hexene(c,t)                     | 6669  | 1000118-16-4 | 41 |
|    |        |      | 2-Pentene, 3-ethyl-2-methyl-                   | 6708  | 019780-67-7  | 38 |
|    |        |      | 3-Hexene, 2,4-dimethyl-                        | 6642  | 082085-14-1  | 38 |
| 44 | 10.288 | 0.04 | 3-Heptene, 2,2,3,5,6-pentamethyl-              | 36065 | 116164-06-8  | 62 |
|    |        |      | 2-Pentene, 4-methyl-, (Z)-                     | 1510  | 000691-38-3  | 43 |
|    |        |      | Cyclohexane, 1-ethyl-1,4-dimethyl-, trans-     | 17850 | 062238-32-8  | 43 |
| 45 | 13.307 | 1.66 | Propyl aldoxime, 2-methyl-, anti-              | 1892  | 005775-73-5  | 27 |
|    |        |      | 1,3-Cyclobutanedione, 2,2,4,4-tetramethyl-     | 18281 | 000933-52-8  | 16 |



|    |        |       |                                                    |        |              |    |
|----|--------|-------|----------------------------------------------------|--------|--------------|----|
|    |        |       | Propyl aldoxime, 2-methyl-, syn-                   | 1891   | 005780-39-2  | 16 |
| 46 | 13.369 | 0.79  |                                                    |        |              |    |
|    |        |       | Propyl aldoxime, 2-methyl-, syn-                   | 1891   | 005780-39-2  | 16 |
|    |        |       | 1-Oxa-3,4-diazacyclopentadiene                     | 494    | 000288-99-3  | 16 |
|    |        |       | Alanine, N-methyl-n-propoxycarbonyl-, propyl ester | 83208  | 1000329-42-9 | 14 |
| 47 | 13.924 | 0.81  |                                                    |        |              |    |
|    |        |       | Cyclohexanamine, N-methyl-N-nitroso-               | 19293  | 005432-28-0  | 38 |
|    |        |       | 1-n-Butoxy-2,3-dimethyldiaziridine                 | 20073  | 343928-70-1  | 32 |
|    |        |       | Propane, 2-isocyanato-                             | 1548   | 001795-48-8  | 9  |
| 48 | 15.110 | 0.02  |                                                    |        |              |    |
|    |        |       | 1-Methoxy-2,3-cis-dimethylaziridine (sin)          | 4101   | 061593-25-7  | 47 |
|    |        |       | Azetidine, 1,1'-methylenebis-                      | 11113  | 038455-24-2  | 38 |
|    |        |       | 1,3-Cyclobutanedione, 2,2,4,4-tetra-methyl-        | 18281  | 000933-52-8  | 28 |
| 49 | 18.653 | 10.03 |                                                    |        |              |    |
|    |        |       | Azetidine, n-propyl-                               | 3511   |              | 16 |
|    |        |       | 1-Methoxy-2,3-cis-dimethylaziridine (sin)          | 4101   | 061593-25-7  | 12 |
|    |        |       | Phosphine oxide, methyldiphenyl-                   | 71649  | 002129-89-7  | 12 |
| 50 | 18.756 | 6.03  |                                                    |        |              |    |
|    |        |       | Decyl alcohol, tert-butyldimethylsilyl ether       | 115281 | 1000333-00-5 | 22 |
|    |        |       | Azetidine, n-propyl-                               | 3511   |              | 16 |
|    |        |       | 1-Methoxy-2,3-cis-dimethylaziridine (sin)          | 4101   | 061593-25-7  | 12 |
| 51 | 19.090 | 1.78  |                                                    |        |              |    |
|    |        |       | Azetidine, n-propyl-                               | 3511   |              | 25 |
|    |        |       | (R)-(-)-2-Pyrrolidinemethanol                      | 4079   | 068832-13-3  | 10 |
|    |        |       | (S)-(+)-2-Pyrrolidinemethanol                      | 4078   | 023356-96-9  | 10 |
| 52 | 19.290 | 3.64  |                                                    |        |              |    |
|    |        |       | Azetidine, n-propyl-                               | 3511   |              | 17 |
|    |        |       | (S)-(+)-2-Pyrrolidinemethanol                      | 4078   | 023356-96-9  | 10 |
|    |        |       | 2H-Pyran-2,6(3H)-dione, dihydro-                   | 7058   | 000108-55-4  | 10 |
| 53 | 22.510 | 0.42  |                                                    |        |              |    |

|    |        |      |                                                                                                |        |              |    |
|----|--------|------|------------------------------------------------------------------------------------------------|--------|--------------|----|
|    |        |      | 3-Amino-6-nitro-4-phenylsulfanyl-benzo[b]thiophene-2-carboxylic acid methyl ester              | 177075 | 1000275-36-3 | 32 |
|    |        |      | Benzoic acid, 4-(3,4-dihydro-2,4-dioxo-2H-pyrimido[4,5-b]quinolin-10-yl)-, ethyl ester         | 177893 | 317326-96-8  | 27 |
|    |        |      | 1-Methoxy-2,3-cis-dimethylaziridine (sin)                                                      | 4101   | 061593-25-7  | 25 |
| 54 | 22.664 | 0.29 |                                                                                                |        |              |    |
|    |        |      | 3-Amino-6-nitro-4-phenylsulfanyl-benzo[b]thiophene-2-carboxylic acid methyl ester              | 177075 | 1000275-36-3 | 38 |
|    |        |      | 2-Quinolinecarboxylic acid, 4-[(tert-butyl)dimethylsilyl]oxy]-, tert-butyl)dimethylsilyl ester | 200507 | 1000221-71-1 | 17 |
|    |        |      | Thianthrene, octafluoro-                                                                       | 176996 | 016012-83-2  | 16 |
| 55 | 22.813 | 0.47 |                                                                                                |        |              |    |
|    |        |      | Thianthrene, octafluoro-                                                                       | 176996 | 016012-83-2  | 25 |
|    |        |      | 2-Quinolinecarboxylic acid, 4-[(tert-butyl)dimethylsilyl]oxy]-, tert-butyl)dimethylsilyl ester | 200507 | 1000221-71-1 | 23 |
|    |        |      | 5.alpha.-Pregnane-12,20-dione, cyclic 12-(ethylene acetal)                                     | 177585 | 005618-27-9  | 9  |
| 56 | 22.941 | 0.34 |                                                                                                |        |              |    |
|    |        |      | Thianthrene, octafluoro-                                                                       | 176996 | 016012-83-2  | 25 |
|    |        |      | 2-Quinolinecarboxylic acid, 4-[(tert-butyl)dimethylsilyl]oxy]-, tert-butyl)dimethylsilyl ester | 200507 | 1000221-71-1 | 23 |
|    |        |      | 5.alpha.-Pregnane-12,20-dione, cyclic 12-(ethylene acetal)                                     | 177585 | 005618-27-9  | 9  |

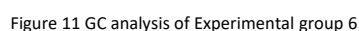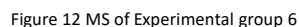

| Peak | R.T.  | Area% | Material                   | Reference | CAS         | Mass |
|------|-------|-------|----------------------------|-----------|-------------|------|
| 1    | 2.693 | 2.34  |                            |           |             |      |
|      |       |       | 2-Pentene, 3-methyl-       | 1466      | 000922-61-2 | 64   |
|      |       |       | Pentane, 3-methylene-      | 1488      | 000760-21-4 | 62   |
|      |       |       | 2-Pentene, 3-methyl-, (Z)- | 1508      | 000922-62-3 | 62   |
| 2    | 3.807 | 16.43 |                            |           |             |      |
|      |       |       | Hexane, 3-methyl-          | 3944      | 000589-34-4 | 59   |
|      |       |       | Heptane                    | 3943      | 000142-82-5 | 58   |
|      |       |       | Heptane                    | 3941      | 000142-82-5 | 53   |
| 3    | 4.362 | 12.32 |                            |           |             |      |
|      |       |       | Cycloheptane               | 3275      | 000291-64-5 | 50   |
|      |       |       | 1-Heptene                  | 3269      | 000592-76-7 | 46   |
|      |       |       | Cycloheptane               | 3273      | 000291-64-5 | 43   |
| 4    | 4.665 | 6.81  |                            |           |             |      |

|    |       |       |                                    |       |             |    |
|----|-------|-------|------------------------------------|-------|-------------|----|
|    |       |       | Cyclohexane, methyl-               | 3312  | 000108-87-2 | 52 |
|    |       |       | 2-Pentene, 2,3-dimethyl-           | 3323  | 010574-37-5 | 43 |
|    |       |       | 3-Penten-2-one, 4-methyl-          | 3203  | 000141-79-7 | 43 |
| 5  | 4.706 | 1.08  |                                    |       |             |    |
|    |       |       | Cyclohexane, methyl-               | 3312  | 000108-87-2 | 47 |
|    |       |       | 1-Pentene, 2,3-dimethyl-           | 3333  | 003404-72-6 | 43 |
|    |       |       | 3-Penten-2-one, 4-methyl-          | 3203  | 000141-79-7 | 38 |
| 6  | 4.850 | 3.78  |                                    |       |             |    |
|    |       |       | Cyclopentane, 1,3-dimethyl-        | 3364  | 002453-00-1 | 46 |
|    |       |       | 1-Hexene, 4-ethyl-                 | 6593  | 016746-85-3 | 41 |
|    |       |       | Heptane, 2-methyl-                 | 7560  | 000592-27-8 | 38 |
| 7  | 5.379 | 12.75 |                                    |       |             |    |
|    |       |       | Octane, 4-methyl-                  | 12531 | 002216-34-4 | 46 |
|    |       |       | Hexane, 2,3,4-trimethyl-           | 12578 | 000921-47-1 | 43 |
|    |       |       | Hexane, 2,3,4-trimethyl-           | 12570 | 000921-47-1 | 43 |
| 8  | 5.522 | 2.30  |                                    |       |             |    |
|    |       |       | 1-Octene                           | 6558  | 000111-66-0 | 45 |
|    |       |       | Heptane, 3-methyl-                 | 7552  | 000589-81-1 | 38 |
|    |       |       | Heptane, 2-methyl-                 | 7560  | 000592-27-8 | 38 |
| 9  | 5.574 | 2.14  |                                    |       |             |    |
|    |       |       | Octane                             | 7547  | 000111-65-9 | 43 |
|    |       |       | Heptane, 2-methyl-                 | 7560  | 000592-27-8 | 41 |
|    |       |       | Hexane, 3-methyl-                  | 3947  | 000589-34-4 | 38 |
| 10 | 5.656 | 1.20  |                                    |       |             |    |
|    |       |       | Octane                             | 7548  | 000111-65-9 | 62 |
|    |       |       | Heptane, 3-methyl-                 | 7552  | 000589-81-1 | 55 |
|    |       |       | Heptane, 4-methyl-                 | 7554  | 000589-53-7 | 45 |
| 11 | 5.733 | 2.40  |                                    |       |             |    |
|    |       |       | Heptane, 3,4,5-trimethyl-          | 18959 | 020278-89-1 | 49 |
|    |       |       | Heptane, 3-methyl-                 | 7556  | 000589-81-1 | 49 |
|    |       |       | Cyclobutane, 1,2-diethyl-, trans-  | 6747  | 019341-98-1 | 30 |
| 12 | 5.820 | 1.78  |                                    |       |             |    |
|    |       |       | Cyclohexane, 1,2-dimethyl-         | 6671  | 000583-57-3 | 70 |
|    |       |       | Cyclohexane, 1,2-dimethyl-         | 6680  | 000583-57-3 | 70 |
|    |       |       | Cyclohexane, 1,2-dimethyl-, trans- | 6756  | 006876-23-9 | 70 |

|    |       |      |                                           |       |                |
|----|-------|------|-------------------------------------------|-------|----------------|
| 13 | 5.846 | 0.60 |                                           |       |                |
|    |       |      | Cyclooctane                               | 6564  | 000292-64-8 86 |
|    |       |      | Cyclohexane, 1,2-dimethyl-                | 6680  | 000583-57-3 70 |
|    |       |      | Cyclohexane, 1,2-dimethyl-, cis-          | 6740  | 002207-01-4 64 |
| 14 | 5.918 | 1.97 |                                           |       |                |
|    |       |      | Cyclopentane, 1-ethyl-2-methyl-, cis-     | 6763  | 000930-89-2 90 |
|    |       |      | Cyclopentane, 1-ethyl-2-methyl-, cis-     | 6761  | 000930-89-2 86 |
|    |       |      | Cyclopentane, 1-ethyl-2-methyl-           | 6730  | 003726-46-3 86 |
| 15 | 5.974 | 1.44 |                                           |       |                |
|    |       |      | Hexyl octyl ether                         | 70362 | 017071-54-4 64 |
|    |       |      | Octane                                    | 7548  | 000111-65-9 52 |
|    |       |      | Cyclopentane, 1-ethyl-2-methyl-, cis-     | 6763  | 000930-89-2 46 |
| 16 | 6.113 | 4.64 |                                           |       |                |
|    |       |      | Octane                                    | 7548  | 000111-65-9 83 |
|    |       |      | Heptane, 2,4-dimethyl-                    | 12548 | 002213-23-2 60 |
|    |       |      | Pentane, 3-ethyl-2-methyl-                | 7595  | 000609-26-7 58 |
| 17 | 6.324 | 0.64 |                                           |       |                |
|    |       |      | Octane, 1,1'-oxybis-                      | 91961 | 000629-82-3 43 |
|    |       |      | Hexane, 2,2,5,5-tetramethyl-              | 18981 | 001071-81-4 43 |
|    |       |      | Heptane, 2,2-dimethyl-                    | 12569 | 001071-26-7 43 |
| 18 | 6.380 | 0.84 |                                           |       |                |
|    |       |      | Heptane, 2,3-dimethyl-                    | 12557 | 003074-71-3 58 |
|    |       |      | Heptane, 2,3-dimethyl-                    | 12547 | 003074-71-3 58 |
|    |       |      | Heptane, 2,4-dimethyl-                    | 12548 | 002213-23-2 53 |
| 19 | 6.416 | 0.50 |                                           |       |                |
|    |       |      | Cyclopentane, 1-ethyl-2-methyl-, c<br>is- | 6764  | 000930-89-2 70 |
|    |       |      | Cyclopentane, 1-ethyl-2-methyl-, c<br>is- | 6761  | 000930-89-2 60 |
|    |       |      | Cyclopentane, 1-ethyl-2-methyl-           | 6730  | 003726-46-3 55 |
| 20 | 6.508 | 1.69 |                                           |       |                |
|    |       |      | Cyclooctane                               | 6564  | 000292-64-8 46 |
|    |       |      | Caprolactam                               | 6857  | 000105-60-2 38 |
|    |       |      | Cyclopentane, 1-ethyl-2-methyl-, cis-     | 6764  | 000930-89-2 25 |
| 21 | 6.539 | 0.69 |                                           |       |                |
|    |       |      | Cyclopentane, propyl-                     | 6632  | 002040-96-2 49 |

|    |       |      |                                               |       |              |    |
|----|-------|------|-----------------------------------------------|-------|--------------|----|
|    |       |      | Cyclooctane                                   | 6564  | 000292-64-8  | 46 |
|    |       |      | 3-Octene, (E)-                                | 6566  | 014919-01-8  | 43 |
| 22 | 6.601 | 1.46 |                                               |       |              |    |
|    |       |      | Heptane, 3,5-dimethyl-                        | 12549 | 000926-82-9  | 41 |
|    |       |      | Cyclohexane, ethyl-                           | 6601  | 001678-91-7  | 30 |
|    |       |      | Heptane, 2,5-dimethyl-                        | 12563 | 002216-30-0  | 30 |
| 23 | 6.663 | 0.62 |                                               |       |              |    |
|    |       |      | Cyclohexane, 1,1,3-trimethyl-                 | 11476 | 003073-66-3  | 58 |
|    |       |      | Cyclohexane, 1,1,3-trimethyl-                 | 11475 | 003073-66-3  | 52 |
|    |       |      | 2,4,6-Trimethyl-1,5-diazabicyclo[3.1.0]hexane | 11139 | 1000283-21-2 | 50 |
| 24 | 6.693 | 0.39 |                                               |       |              |    |
|    |       |      | 2-Butanone, oxime                             | 1863  | 000096-29-7  | 46 |
|    |       |      | 2-Butanone, oxime                             | 1865  | 000096-29-7  | 46 |
|    |       |      | 2-Butanone, oxime                             | 1864  | 000096-29-7  | 46 |
| 25 | 6.750 | 0.52 |                                               |       |              |    |
|    |       |      | 2-Butanone, oxime                             | 1865  | 000096-29-7  | 86 |
|    |       |      | 2-Butanone, oxime                             | 1864  | 000096-29-7  | 64 |
|    |       |      | Cyclobutane, methyl-                          | 570   | 000598-61-8  | 38 |
| 26 | 6.837 | 1.12 |                                               |       |              |    |
|    |       |      | 2-Butanone, oxime                             | 1864  | 000096-29-7  | 90 |
|    |       |      | 2-Butanone, oxime                             | 1863  | 000096-29-7  | 78 |
|    |       |      | 2-Butanone, oxime                             | 1865  | 000096-29-7  | 60 |
| 27 | 6.955 | 2.89 |                                               |       |              |    |
|    |       |      | 2-Butanone, oxime                             | 1864  | 000096-29-7  | 90 |
|    |       |      | 2-Butanone, oxime                             | 1863  | 000096-29-7  | 89 |
|    |       |      | 2-Butanone, oxime                             | 1865  | 000096-29-7  | 60 |
| 28 | 7.043 | 1.19 |                                               |       |              |    |
|    |       |      | 1H-Indole, 5,6,7-trimethyl-                   | 29912 | 054340-99-7  | 30 |
|    |       |      | Ethanone, 1-(1H-indol-3-yl)-                  | 29874 | 000703-80-0  | 27 |
|    |       |      | Ethanone, 1-(1H-indol-3-yl)-                  | 29866 | 000703-80-0  | 27 |
| 29 | 7.140 | 1.26 |                                               |       |              |    |
|    |       |      | Benzene, 1,3-dimethyl-                        | 5058  | 000108-38-3  | 91 |
|    |       |      | p-Xylene                                      | 5032  | 000106-42-3  | 91 |
|    |       |      | o-Xylene                                      | 5039  | 000095-47-6  | 91 |

|    |       |      |                                                  |       |                 |
|----|-------|------|--------------------------------------------------|-------|-----------------|
| 30 | 7.212 | 0.13 |                                                  |       |                 |
|    |       |      | 2(5H)-Furanone, 5-(2-methyl-3-methyl-4-butyl)-   | 34190 | 1000155-85-8 59 |
|    |       |      | 2-Pentene, 4,4-dimethyl-                         | 3325  | 026232-98-4 43  |
|    |       |      | 2-Hexene, 4,4,5-trimethyl-                       | 11444 | 055702-61-9 43  |
| 31 | 7.330 | 0.04 |                                                  |       |                 |
|    |       |      | Cyclopentane, 1-methyl-2-propyl-                 | 11484 | 003728-57-2 95  |
|    |       |      | 1-Dodecanol                                      | 49039 | 000112-53-8 83  |
|    |       |      | Cyclopentane, 1-ethyl-2-methyl-, cis-            | 6763  | 000930-89-2 55  |
| 32 | 7.392 | 0.03 |                                                  |       |                 |
|    |       |      | cis-1-Ethyl-3-methyl-cyclohexane                 | 11486 | 019489-10-2 93  |
|    |       |      | 1-Ethyl-3-methylcyclohexane (c,t)                | 11488 | 003728-55-0 91  |
|    |       |      | 1-Ethyl-4-methylcyclohexane                      | 11451 | 003728-56-1 64  |
| 33 | 7.458 | 0.26 |                                                  |       |                 |
|    |       |      | o-Xylene                                         | 5039  | 000095-47-6 95  |
|    |       |      | p-Xylene                                         | 5032  | 000106-42-3 95  |
|    |       |      | p-Xylene                                         | 5030  | 000106-42-3 95  |
| 34 | 7.561 | 0.31 |                                                  |       |                 |
|    |       |      | Nonane                                           | 12526 | 000111-84-2 95  |
|    |       |      | Nonane                                           | 12527 | 000111-84-2 95  |
|    |       |      | Nonane                                           | 12528 | 000111-84-2 83  |
| 35 | 7.623 | 0.02 |                                                  |       |                 |
|    |       |      | 1-Propanamine, 2-methyl-N-(2-methylpropylidene)- | 11802 | 006898-82-4 27  |
|    |       |      | Cyclopentanone, 2-(1-methylpropyl)               | 18536 | 006376-92-7 27  |
|    |       |      | 1-Methoxy-4,4-dimethyl-cyclohex-1-ene            | 18548 | 073741-65-8 25  |
| 36 | 7.720 | 0.03 |                                                  |       |                 |
|    |       |      | 2,5-Dimethyl-1-pyrroline                         | 2959  | 000822-64-0 43  |
|    |       |      | 1-Ethyl-4-methylcyclohexane                      | 11451 | 003728-56-1 42  |
|    |       |      | 1-Ethyl-3-methylcyclohexane (c,t)                | 11488 | 003728-55-0 41  |
| 37 | 7.844 | 0.10 |                                                  |       |                 |
|    |       |      | Cyclopentane, 1,2,3,4,5-pentamethyl-             | 17833 | 1000152-79-7 64 |
|    |       |      | 3,6,6-Trimethyl-cyclohex-2-enol                  | 18506 | 073741-62-5 47  |
|    |       |      | 1-Propanamine, 2-methyl-N-(2-methylpropylidene)- | 11802 | 006898-82-4 43  |

|    |       |      |                                                       |        |                 |
|----|-------|------|-------------------------------------------------------|--------|-----------------|
| 38 | 7.900 | 0.11 |                                                       |        |                 |
|    |       |      | Cyclohexane, 1-methyl-3-propyl-                       | 17809  | 004291-80-9 64  |
|    |       |      | Cyclohexane, 1-methyl-4-(1-methyl-<br>thyl)-, trans-  | 17856  | 001678-82-6 58  |
|    |       |      | Sulfurous acid, cyclohexylmethyl h<br>exyl ester      | 106952 | 1000309-21-6 53 |
| 39 | 7.972 | 0.09 |                                                       |        |                 |
|    |       |      | Cyclopentane, 1,2,3,4,5-pentamethyl-                  | 17833  | 1000152-79-7 50 |
|    |       |      | 2,3,4,4a,8,8a-Hexahydro-pyrano[3,2<br>-b]pyran        | 18282  | 1000189-55-7 47 |
|    |       |      | 1-Dodecanone, 1-cyclopropyl-                          | 78144  | 019873-44-0 47  |
| 40 | 8.121 | 0.03 |                                                       |        |                 |
|    |       |      | Octane, 2,6-dimethyl-                                 | 18948  | 002051-30-1 93  |
|    |       |      | Octane, 2,6-dimethyl-                                 | 18952  | 002051-30-1 89  |
|    |       |      | Octane, 2,6-dimethyl-                                 | 18936  | 002051-30-1 87  |
| 41 | 8.563 | 0.05 |                                                       |        |                 |
|    |       |      | 2-Pentene, 4,4-dimethyl-                              | 3325   | 026232-98-4 47  |
|    |       |      | Furan, 2-methoxy-                                     | 3064   | 025414-22-6 43  |
|    |       |      | Diethylcyanamide                                      | 3027   | 000617-83-4 43  |
| 42 | 8.686 | 0.04 |                                                       |        |                 |
|    |       |      | Octane, 2,3-dimethyl-                                 | 18946  | 007146-60-3 60  |
|    |       |      | Sulfurous acid, cyclohexylmethyl p<br>entadecyl ester | 191068 | 1000309-22-3 43 |
|    |       |      | 2-Pentene, 3,4-dimethyl-, (Z)-                        | 3367   | 004914-91-4 38  |
| 43 | 8.753 | 0.02 |                                                       |        |                 |
|    |       |      | 2,4-Dimethyl-3-hexene(c,t)                            | 6669   | 1000118-16-4 46 |
|    |       |      | Cyclohexane, (1,2-dimethylbutyl)-                     | 36064  | 061142-37-8 43  |
|    |       |      | 2-Pentene, 3-ethyl-2-methyl-                          | 6708   | 019780-67-7 43  |
| 44 | 9.430 | 0.03 |                                                       |        |                 |
|    |       |      | Cyclohexanone, 3,3,5,5-tetramethyl                    | 26315  | 014376-79-5 72  |
|    |       |      | 2-Pentene, 3,4-dimethyl-                              | 3324   | 024910-63-2 52  |
|    |       |      | 2-Pentene, 4,4-dimethyl-, (E)-                        | 3374   | 000690-08-4 52  |
| 45 | 9.564 | 0.12 |                                                       |        |                 |
|    |       |      | 2,2,4-Trimethyl-3-hexene                              | 11429  | 059643-72-0 46  |
|    |       |      | Cyclohexane, 1,1,3,5-tetramethyl-,<br>cis-            | 17837  | 050876-32-9 43  |



|    |        |      |                                                   |        |              |    |
|----|--------|------|---------------------------------------------------|--------|--------------|----|
|    |        |      | 3-Heptene, 2,2,3,5,6-pentamethyl-                 | 36065  | 116164-06-8  | 43 |
| 46 | 9.615  | 0.04 |                                                   |        |              |    |
|    |        |      | cis,cis,cis-1-Isobutyl-2,5-dimethylcyclohexane    | 36080  | 1000113-60-0 | 81 |
|    |        |      | 3-Isopropyl-5-methyl-hex-4-en-2-on                | 26309  | 077142-85-9  | 68 |
|    |        |      | Cyclohexane, 1,1,3-trimethyl-                     | 11476  | 003073-66-3  | 64 |
| 47 | 9.852  | 0.01 |                                                   |        |              |    |
|    |        |      | Oxalic acid, diisohexyl ester                     | 103928 | 1000309-32-9 | 43 |
|    |        |      | Hexane, 1,1'-oxybis-                              | 49052  | 000112-58-3  | 38 |
|    |        |      | 2,2-Dimethylvaleric acid                          | 13300  | 001185-39-3  | 38 |
| 48 | 10.031 | 0.03 |                                                   |        |              |    |
|    |        |      | Cyclohexane, 1,1-dimethyl-                        | 6683   | 000590-66-9  | 59 |
|    |        |      | Sulfurous acid, cyclohexylmethyl tetradecyl ester | 184919 | 1000309-22-2 | 59 |
|    |        |      | Cyclohexane, 1,3-dimethyl-, cis-                  | 6745   | 000638-04-0  | 59 |
| 49 | 10.134 | 0.06 |                                                   |        |              |    |
|    |        |      | 3-Hexene, 2,3-dimethyl-                           | 6657   | 007145-23-5  | 59 |
|    |        |      | 2,4-Dimethyl-3-hexene(c,t)                        | 6669   | 1000118-16-4 | 45 |
|    |        |      | 3-Hexene, 3,4-dimethyl-                           | 6641   | 030951-95-2  | 38 |
| 50 | 10.288 | 0.03 |                                                   |        |              |    |
|    |        |      | cis,cis,cis-1-Isobutyl-2,5-dimethylcyclohexane    | 36080  | 1000113-60-0 | 45 |
|    |        |      | 2-Pentene, 4-methyl-, (Z)-                        | 1510   | 000691-38-3  | 43 |
|    |        |      | Cyclopropanecarboxylic acid,4-methylpentyl ester  | 37276  | 1000245-65-4 | 35 |
| 51 | 10.740 | 0.07 |                                                   |        |              |    |
|    |        |      | Cyclopentanone, 2-ethyl-                          | 6479   | 004971-18-0  | 50 |
|    |        |      | 6-Methyl-cyclohex-2-en-1-ol                       | 6498   | 1000144-17-3 | 43 |
|    |        |      | 1-Octene                                          | 6559   | 000111-66-0  | 43 |
| 52 | 13.308 | 2.32 |                                                   |        |              |    |
|    |        |      | 1,3-Cyclobutanedione, 2,2,4,4-tetramethyl-        | 18281  | 000933-52-8  | 30 |
|    |        |      | Propyl aldoxime, 2-methyl-, anti-                 | 1892   | 005775-73-5  | 27 |
|    |        |      | Propyl aldoxime, 2-methyl-, syn-                  | 1891   | 005780-39-2  | 16 |
| 53 | 13.421 | 0.78 |                                                   |        |              |    |
|    |        |      | Propyl aldoxime, 2-methyl-, syn-                  | 1891   | 005780-39-2  | 16 |

|    |        |      |                                                                                                         |        |              |    |
|----|--------|------|---------------------------------------------------------------------------------------------------------|--------|--------------|----|
|    |        |      | Valine, N-methyl-N-methoxycarbonyl-, dodecyl ester                                                      | 175649 | 1000328-94-0 | 14 |
|    |        |      | Azetidine, n-propyl-                                                                                    | 3511   |              | 12 |
| 54 | 13.939 | 1.04 |                                                                                                         |        |              |    |
|    |        |      | Cyclohexanamine, N-methyl-N-nitroso-                                                                    | 19293  | 005432-28-0  | 38 |
|    |        |      | Propane, 2-isocyanato-                                                                                  | 1548   | 001795-48-8  | 9  |
|    |        |      | (S)-(+)-2-Pyrrolidinemethanol                                                                           | 4081   | 023356-96-9  | 9  |
| 55 | 15.254 | 0.15 |                                                                                                         |        |              |    |
|    |        |      | Azetidine, n-propyl-                                                                                    | 3511   |              | 28 |
|    |        |      | 1,3-Cyclobutanedione, 2,2,4,4-tetraamethyl-                                                             | 18281  | 000933-52-8  | 28 |
|    |        |      | Azetidine, 1,1'-methylenebis-                                                                           | 11113  | 038455-24-2  | 28 |
| 56 | 18.653 | 4.25 |                                                                                                         |        |              |    |
|    |        |      | Azetidine, n-propyl-                                                                                    | 3511   |              | 16 |
|    |        |      | 1-Methoxy-2,3-cis-dimethylaziridine (sin)                                                               | 4101   | 061593-25-7  | 12 |
|    |        |      | Nonanoic acid, tert-butyldimethylsilyl ester                                                            | 115100 | 104255-73-4  | 10 |
| 57 | 18.761 | 0.16 |                                                                                                         |        |              |    |
|    |        |      | Decyl alcohol, tert-butyldimethylsilyl ether                                                            | 115281 | 1000333-00-5 | 22 |
|    |        |      | Azetidine, n-propyl-                                                                                    | 3511   |              | 16 |
|    |        |      | 1-Methoxy-2,3-cis-dimethylaziridine (sin)                                                               | 4101   | 061593-25-7  | 12 |
| 58 | 19.290 | 0.09 |                                                                                                         |        |              |    |
|    |        |      | Nonanoic acid, tert-butyldimethylsilyl ester                                                            | 115100 | 104255-73-4  | 14 |
|    |        |      | (R)-(-)-2-Pyrrolidinemethanol                                                                           | 4079   | 068832-13-3  | 10 |
|    |        |      | 2H-Pyran-2,6(3H)-dione, dihydro-                                                                        | 7058   | 000108-55-4  | 10 |
| 59 | 22.089 | 0.39 |                                                                                                         |        |              |    |
|    |        |      | 1-Oxa-3,4-diazacyclopentadiene                                                                          | 494    | 000288-99-3  | 25 |
|    |        |      | 3-Amino-6-nitro-4-phenylsulfanylbenzo[b]thiophene-2-carboxylic acid methyl ester                        | 177075 | 1000275-36-3 | 12 |
|    |        |      | Benzo[1,2-b:4,3-b']dipyrrole-1,8-dicarboxylic acid, 3,6-dihydro-3,6-bis(methoxymethyl)-, dimethyl ester | 177207 | 174832-71-4  | 12 |

|    |        |      |                                                                                               |        |                 |
|----|--------|------|-----------------------------------------------------------------------------------------------|--------|-----------------|
| 60 | 22.505 | 0.11 |                                                                                               |        |                 |
|    |        |      | 3-Amino-6-nitro-4-phenylsulfanyl-benzo[b]thiophene-2-carboxylic acid methyl ester             | 177075 | 1000275-36-3 32 |
|    |        |      | Benzoic acid, 4-(3,4-dihydro-2,4-dioxo-2H-pyrimido[4,5-b]quinolin-10-yl)-, ethyl ester        | 177893 | 317326-96-8 27  |
|    |        |      | 1-Methoxy-2,3-cis-dimethylaziridine (sin)                                                     | 4101   | 061593-25-7 25  |
| 61 | 22.654 | 0.34 |                                                                                               |        |                 |
|    |        |      | 3-Amino-6-nitro-4-phenylsulfanyl-benzo[b]thiophene-2-carboxylic acid methyl ester             | 177075 | 1000275-36-3 38 |
|    |        |      | 2-Quinolinecarboxylic acid, 4-[(tert-butyl)dimethylsilyloxy]-, tert-butyl)dimethylsilyl ester | 200507 | 1000221-71-1 17 |
|    |        |      | Thianthrene, octafluoro-                                                                      | 176996 | 016012-83-2 16  |
| 62 | 22.741 | 0.22 |                                                                                               |        |                 |
|    |        |      | 3-Amino-6-nitro-4-phenylsulfanyl-benzo[b]thiophene-2-carboxylic acid methyl ester             | 177075 | 1000275-36-3 38 |
|    |        |      | 2-Quinolinecarboxylic acid, 4-[(tert-butyl)dimethylsilyloxy]-, tert-butyl)dimethylsilyl ester | 200507 | 1000221-71-1 17 |
|    |        |      | Thianthrene, octafluoro-                                                                      | 176996 | 016012-83-2 16  |
| 63 | 22.803 | 0.34 |                                                                                               |        |                 |
|    |        |      | Thianthrene, octafluoro-                                                                      | 176996 | 016012-83-2 25  |
|    |        |      | 2-Quinolinecarboxylic acid, 4-[(tert-butyl)dimethylsilyloxy]-, tert-butyl)dimethylsilyl ester | 200507 | 1000221-71-1 23 |
|    |        |      | 6,7-Dimethyl-2-(4-prop-2-ynyloxy-benzylidene)-benzo[4,5]imidazo[2,1-b]thiazol-3-one           | 177375 | 1000296-51-8 9  |
| 64 | 22.931 | 0.39 |                                                                                               |        |                 |
|    |        |      | Thianthrene, octafluoro-                                                                      | 176996 | 016012-83-2 25  |
|    |        |      | 2-Quinolinecarboxylic acid, 4-[(tert-butyl)dimethylsilyloxy]-, tert-butyl)dimethylsilyl ester | 200507 | 1000221-71-1 23 |
|    |        |      | N,N'-di-2-Naphthyl-p-phenylenediamine                                                         | 177646 | 000093-46-9 9   |

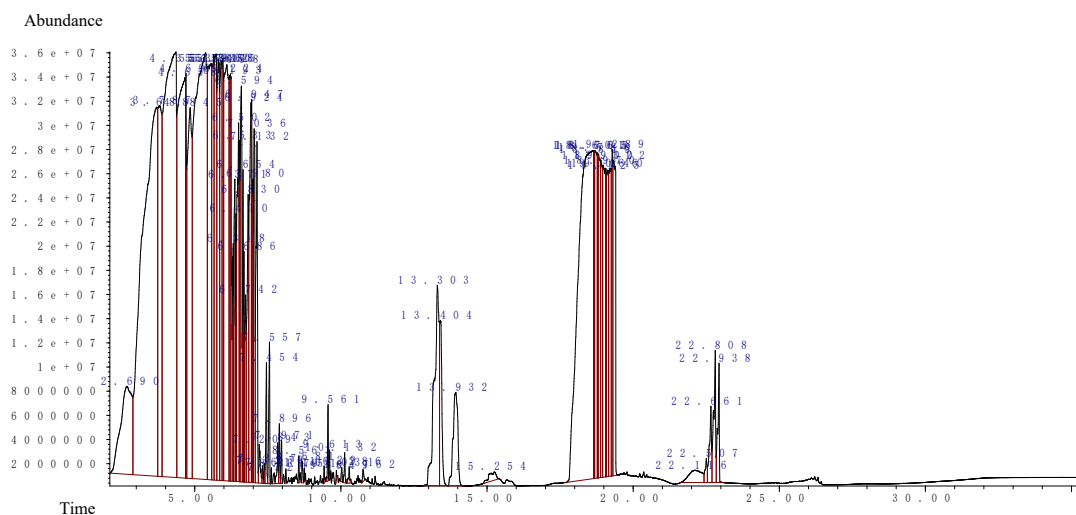

Figure 13 GC analysis of Experimental group 7

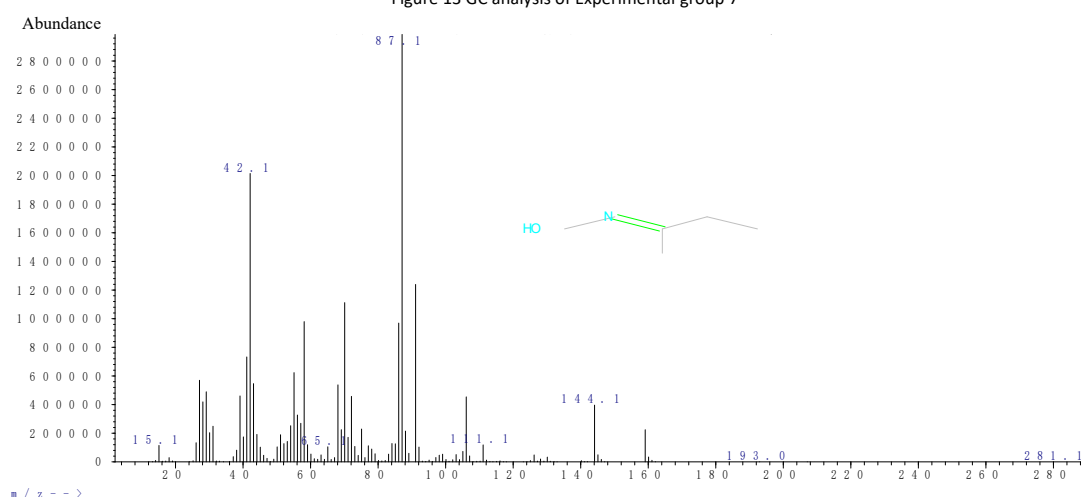

Figure 14 MS of Experimental group 7

| Peak | R.T.        | Area% | Material                   | Reference | CAS         | Mass |
|------|-------------|-------|----------------------------|-----------|-------------|------|
| 1    | 2.688       | 1.93  | 2-Pentene, 3-methyl-, (Z)- | 1506      | 000922-62-3 | 64   |
|      |             |       | 2-Pentene, 3-methyl-       | 1466      | 000922-61-2 | 64   |
|      |             |       | 2-Pentene, 3-methyl-, (Z)- | 1508      | 000922-62-3 | 62   |
| 2    | 3.689 10.52 |       | Heptane                    | 3943      | 000142-82-5 | 58   |
|      |             |       | Pentane, 2,3-dimethyl-     | 3962      | 000565-59-3 | 49   |
|      |             |       | Butane, 2,2-dimethyl-      | 1826      | 000075-83-2 | 43   |
| 3    | 3.787       | 2.69  | Hexane, 3-methyl-          | 3944      | 000589-34-4 | 59   |
|      |             |       | Heptane                    | 3943      | 000142-82-5 | 58   |
|      |             |       | Heptane                    | 3941      | 000142-82-5 | 53   |

|    |       |       |                                                               |       |                  |
|----|-------|-------|---------------------------------------------------------------|-------|------------------|
| 4  | 4.357 | 9.83  |                                                               |       |                  |
|    |       |       | Cycloheptane                                                  | 3275  | 000291-64-5 50   |
|    |       |       | 1-Heptene                                                     | 3269  | 000592-76-7 46   |
|    |       |       | Cycloheptane                                                  | 3273  | 000291-64-5 45   |
| 5  | 4.660 | 5.62  |                                                               |       |                  |
|    |       |       | Cyclohexane, methyl-                                          | 3312  | 000108-87-2 58   |
|    |       |       | Cycloheptane                                                  | 3274  | 000291-64-5 43   |
|    |       |       | 2-Pentene, 2,3-dimethyl-                                      | 3323  | 010574-37-5 43   |
| 6  | 4.701 | 0.80  |                                                               |       |                  |
|    |       |       | Cyclohexane, methyl-                                          | 3312  | 000108-87-2 47   |
|    |       |       | 1-Pentene, 2,3-dimethyl-                                      | 3333  | 003404-72-6 43   |
|    |       |       | 1-Heptene                                                     | 3269  | 000592-76-7 38   |
| 7  | 4.845 | 3.14  |                                                               |       |                  |
|    |       |       | Cyclopentane, 1,3-dimethyl-                                   | 3364  | 002453-00-1 46   |
|    |       |       | Cyclopentane, 1,2,3-trimethyl-, (1.alpha.,2.alpha.,3.alpha.)- | 6770  | 002613-69-6 43   |
|    |       |       | 1-Hexene, 4-ethyl-                                            | 659   | 3 016746-85-3 41 |
| 8  | 5.374 | 10.02 |                                                               |       |                  |
|    |       |       | Hexane, 2,3,4-trimethyl-                                      | 12578 | 000921-47-1 46   |
|    |       |       | Hexane, 2,3,4-trimethyl-                                      | 12570 | 000921-47-1 43   |
|    |       |       | Heptane, 3-methyl-                                            | 7552  | 000589-81-1 30   |
| 9  | 5.564 | 3.03  |                                                               |       |                  |
|    |       |       | Heptane, 3-methyl-                                            | 7552  | 000589-81-1 38   |
|    |       |       | Heptane, 2-methyl-                                            | 7560  | 000592-27-8 38   |
|    |       |       | Octane                                                        | 7547  | 000111-65-9 38   |
| 10 | 5.646 | 1.65  |                                                               |       |                  |
|    |       |       | Octane                                                        | 7548  | 000111-65-9 62   |
|    |       |       | Heptane, 3-methyl-                                            | 7552  | 000589-81-1 55   |
|    |       |       | Hexane, 2,3,4-trimethyl-                                      | 12578 | 000921-47-1 50   |
| 11 | 5.733 | 1.94  |                                                               |       |                  |
|    |       |       | Heptane, 3,4,5-trimethyl-                                     | 18959 | 020278-89-1 49   |
|    |       |       | 2-Heptene, 5-methyl-                                          | 6619  | 022487-87-2 35   |
|    |       |       | Piperidine                                                    | 1558  | 000110-89-4 30   |
| 12 | 5.810 | 1.96  |                                                               |       |                  |
|    |       |       | Cyclohexane, 1,2-dimethyl-, trans-                            | 6752  | 006876-23-9 86   |

|    |       |      |                                           |       |             |    |
|----|-------|------|-------------------------------------------|-------|-------------|----|
|    |       |      | Cyclohexane, 1,2-dimethyl-, trans-        | 6756  | 006876-23-9 | 70 |
|    |       |      | Cyclohexane, 1,2-dimethyl-                | 6671  | 000583-57-3 | 64 |
| 13 | 5.908 | 1.60 |                                           |       |             |    |
|    |       |      | Cyclopentane, 1-ethyl-2-methyl-, c<br>is- | 6763  | 000930-89-2 | 90 |
|    |       |      | Cyclopentane, 1-ethyl-2-methyl-, c<br>is- | 6761  | 000930-89-2 | 86 |
|    |       |      | Cyclopentane, 1-ethyl-2-methyl-           | 6730  | 003726-46-3 | 86 |
| 14 | 5.964 | 1.18 |                                           |       |             |    |
|    |       |      | Hexyl octyl ether                         | 70362 | 017071-54-4 | 64 |
|    |       |      | Octane                                    | 7548  | 000111-65-9 | 52 |
|    |       |      | Cyclopentane, 1-ethyl-2-methyl-, c<br>is- | 6763  | 000930-89-2 | 46 |
| 15 | 6.098 | 3.65 |                                           |       |             |    |
|    |       |      | Octane                                    | 7548  | 000111-65-9 | 83 |
|    |       |      | Pentane, 3-ethyl-2-methyl-                | 7595  | 000609-26-7 | 58 |
|    |       |      | Heptane, 3-methyl-                        | 7552  | 000589-81-1 | 49 |
| 16 | 6.195 | 0.72 |                                           |       |             |    |
|    |       |      | Octane                                    | 7548  | 000111-65-9 | 87 |
|    |       |      | Octane                                    | 7546  | 000111-65-9 | 83 |
|    |       |      | Heptane, 2,3-dimethyl-                    | 12558 | 003074-71-3 | 64 |
| 17 | 6.226 | 1.08 |                                           |       |             |    |
|    |       |      | Octane                                    | 7548  | 000111-65-9 | 87 |
|    |       |      | Octane                                    | 7546  | 000111-65-9 | 72 |
|    |       |      | Octane                                    | 7547  | 000111-65-9 | 72 |
| 18 | 6.318 | 0.52 |                                           |       |             |    |
|    |       |      | Heptane, 5-ethyl-2,2,3-trimethyl-         | 37516 | 062199-06-8 | 53 |
|    |       |      | Pentane, 3-ethyl-2,2-dimethyl-            | 12608 | 016747-32-3 | 50 |
|    |       |      | Hexane, 2,2,5,5-tetramethyl-              | 18980 | 001071-81-4 | 43 |
| 19 | 6.370 | 0.68 |                                           |       |             |    |
|    |       |      | Heptane, 2,3-dimethyl-                    | 12547 | 003074-71-3 | 58 |
|    |       |      | Heptane, 2,3-dimethyl-                    | 12557 | 003074-71-3 | 58 |
|    |       |      | Octane                                    | 7548  | 000111-65-9 | 53 |
| 20 | 6.411 | 0.40 |                                           |       |             |    |
|    |       |      | Cyclopentane, 1-ethyl-2-methyl-           | 6730  | 003726-46-3 | 55 |
|    |       |      | Cyclopentane, 1-ethyl-2-methyl-, cis-     | 6761  | 000930-89-2 | 49 |

|    |       |      |                                           |       |             |    |
|----|-------|------|-------------------------------------------|-------|-------------|----|
|    |       |      | Cyclopentane, 1-ethyl-2-methyl-, cis-     | 6763  | 000930-89-2 | 46 |
| 21 | 6.503 | 1.37 |                                           |       |             |    |
|    |       |      | Cyclooctane                               | 6564  | 000292-64-8 | 46 |
|    |       |      | Caprolactam                               | 6857  | 000105-60-2 | 38 |
|    |       |      | Cyclopentane, 1-ethyl-2-methyl-, c<br>is- | 6764  | 000930-89-2 | 30 |
| 22 | 6.534 | 0.56 |                                           |       |             |    |
|    |       |      | Cyclopentane, propyl-                     | 6632  | 002040-96-2 | 49 |
|    |       |      | Cyclooctane                               | 6564  | 000292-64-8 | 42 |
|    |       |      | Cyclohexane, 1,2-dimethyl-, cis-          | 6740  | 002207-01-4 | 38 |
| 23 | 6.596 | 1.19 |                                           |       |             |    |
|    |       |      | Heptane, 3,5-dimethyl-                    | 12549 | 000926-82-9 | 46 |
|    |       |      | 1-Butoxy-2-ethylhexane                    | 49061 | 062625-25-6 | 35 |
|    |       |      | Heptane, 2,5-dimethyl-                    | 12563 | 002216-30-0 | 30 |
| 24 | 6.652 | 0.50 |                                           |       |             |    |
|    |       |      | Cyclohexane, 1,1,3-trimethyl-             | 11475 | 003073-66-3 | 64 |
|    |       |      | Cyclohexane, 1,1,3-trimethyl-             | 11476 | 003073-66-3 | 58 |
|    |       |      | 2,4-Diamino-1,3,5-triazine                | 5988  | 000504-08-5 | 47 |
| 25 | 6.688 | 0.31 |                                           |       |             |    |
|    |       |      | 2-Butanone, oxime                         | 1865  | 000096-29-7 | 46 |
|    |       |      | 2-Butanone, oxime                         | 1864  | 000096-29-7 | 46 |
|    |       |      | 2-Butanone, oxime                         | 1863  | 000096-29-7 | 46 |
| 26 | 6.745 | 0.43 |                                           |       |             |    |
|    |       |      | 2-Butanone, oxime                         | 1863  | 000096-29-7 | 93 |
|    |       |      | 2-Butanone, oxime                         | 1865  | 000096-29-7 | 90 |
|    |       |      | 2-Butanone, oxime                         | 1864  | 000096-29-7 | 76 |
| 27 | 6.832 | 0.91 |                                           |       |             |    |
|    |       |      | 2-Butanone, oxime                         | 1864  | 000096-29-7 | 90 |
|    |       |      | 2-Butanone, oxime                         | 1863  | 000096-29-7 | 78 |
|    |       |      | 2-Butanone, oxime                         | 1865  | 000096-29-7 | 60 |
| 28 | 6.924 | 1.34 |                                           |       |             |    |
|    |       |      | 2-Butanone, oxime                         | 1864  | 000096-29-7 | 52 |
|    |       |      | 2-Butanone, oxime                         | 1863  | 000096-29-7 | 52 |
|    |       |      | 2-Butanone, oxime                         | 1865  | 000096-29-7 | 46 |
| 29 | 6.945 | 0.55 |                                           |       |             |    |

|    |       |      |                                                |       |              |    |
|----|-------|------|------------------------------------------------|-------|--------------|----|
|    |       |      | Ethylbenzene                                   | 5042  | 000100-41-4  | 40 |
|    |       |      | Ethylbenzene                                   | 5040  | 000100-41-4  | 25 |
|    |       |      | Ethylbenzene                                   | 5043  | 000100-41-4  | 25 |
| 30 | 6.981 | 0.62 |                                                |       |              |    |
|    |       |      | 2-Butanone, oxime                              | 1865  | 000096-29-7  | 70 |
|    |       |      | 2-Butanone, oxime                              | 1864  | 000096-29-7  | 55 |
|    |       |      | 2-Butanone, oxime                              | 1863  | 000096-29-7  | 49 |
| 31 | 7.037 | 0.86 |                                                |       |              |    |
|    |       |      | 1H-Indole, 5,6,7-trimethyl-                    | 29912 | 054340-99-7  | 30 |
|    |       |      | 2,3,5,6-Tetramethylphenylcyanide               | 29924 | 002571-53-1  | 30 |
|    |       |      | 2-Acetylintole                                 | 29811 | 004264-35-1  | 27 |
| 32 | 7.130 | 1.03 |                                                |       |              |    |
|    |       |      | Benzene, 1,3-dimethyl-                         | 5058  | 000108-38-3  | 92 |
|    |       |      | o-Xylene                                       | 5039  | 000095-47-6  | 92 |
|    |       |      | p-Xylene                                       | 5030  | 000106-42-3  | 92 |
| 33 | 7.207 | 0.11 |                                                |       |              |    |
|    |       |      | 2(5H)-Furanone, 5-(2-methyl-3-methyl-4-butyl)- | 34190 | 1000155-85-8 | 59 |
|    |       |      | 1,7-Octadiene, 2,3,3-trimethyl-                | 25014 | 1000150-47-7 | 53 |
|    |       |      | 1,5-Heptadien-4-one, 3,3,6-trimethyl-          | 24779 | 000546-49-6  | 43 |
| 34 | 7.325 | 0.03 |                                                |       |              |    |
|    |       |      | Cyclopentane, 1-methyl-2-propyl-               | 11484 | 003728-57-2  | 95 |
|    |       |      | 1-Dodecanol                                    | 49039 | 000112-53-8  | 80 |
|    |       |      | Cyclooctane, 1,5-dimethyl-                     | 17788 | 021328-57-4  | 58 |
| 35 | 7.387 | 0.02 |                                                |       |              |    |
|    |       |      | cis-1-Ethyl-3-methyl-cyclohexane               | 11486 | 019489-10-2  | 95 |
|    |       |      | 1-Ethyl-3-methylcyclohexane (c,t)              | 11488 | 003728-55-0  | 92 |
|    |       |      | 1-Ethyl-4-methylcyclohexane                    | 11451 | 003728-56-1  | 70 |
| 36 | 7.453 | 0.21 |                                                |       |              |    |
|    |       |      | Benzene, 1,3-dimethyl-                         | 5055  | 000108-38-3  | 95 |
|    |       |      | o-Xylene                                       | 5039  | 000095-47-6  | 95 |
|    |       |      | o-Xylene                                       | 5031  | 000095-47-6  | 95 |
| 37 | 7.556 | 0.26 |                                                |       |              |    |
|    |       |      | Nonane                                         | 12526 | 000111-84-2  | 95 |
|    |       |      | Nonane                                         | 12527 | 000111-84-2  | 95 |
|    |       |      | Nonane                                         | 12528 | 000111-84-2  | 80 |



|    |       |      |                                                   |       |              |    |
|----|-------|------|---------------------------------------------------|-------|--------------|----|
| 38 | 7.618 | 0.02 | 1-Propanamine, 2-methyl-N-(2-methylpropylidene)-  | 11802 | 006898-82-4  | 35 |
|    |       |      | Cyclopentanone, 2-(1-methylpropyl)                | 18536 | 006376-92-7  | 35 |
|    |       |      | Cyclopentane, 1,2,3,4,5-pentamethyl-              | 17833 | 1000152-79-7 | 32 |
| 39 | 7.720 | 0.03 | 2,5-Dimethyl-1-pyrroline                          | 2959  | 000822-64-0  | 45 |
|    |       |      | cis-1-Ethyl-3-methyl-cyclohexane                  | 11486 | 019489-10-2  | 30 |
|    |       |      | 1-Ethyl-3-methylcyclohexane (c,t)                 | 11488 | 003728-55-0  | 30 |
| 40 | 7.844 | 0.08 | Cyclopentane, 1,2,3,4,5-pentamethyl-              | 17833 | 1000152-79-7 | 72 |
|    |       |      | 3,6,6-Trimethyl-cyclohex-2-enol                   | 18506 | 073741-62-5  | 50 |
|    |       |      | Perdeuterobenzene                                 | 1442  | 001076-43-3  | 49 |
| 41 | 7.895 | 0.09 | Cyclohexane, 1-methyl-4-(1-methyl-ethyl)-, trans- | 17856 | 001678-82-6  | 58 |
|    |       |      | Cyclohexane, 1-methyl-4-(1-methyl-ethyl)-, trans- | 17855 | 001678-82-6  | 53 |
|    |       |      | Ethanone, 1-(1-methylcyclohexyl)-                 | 18517 | 002890-62-2  | 53 |
| 42 | 7.972 | 0.07 | Cyclopentane, 1,2,3,4,5-pentamethyl-              | 17833 | 1000152-79-7 | 64 |
|    |       |      | 1-Methoxy-4,4-dimethyl-cyclohex-1-ene             | 18548 | 073741-65-8  | 38 |
|    |       |      | 3-Penten-2-one                                    | 1390  | 000625-33-2  | 38 |
| 43 | 8.121 | 0.02 | Octane, 2,6-dimethyl-                             | 18948 | 002051-30-1  | 93 |
|    |       |      | Octane, 3,6-dimethyl-                             | 18953 | 015869-94-0  | 90 |
|    |       |      | Octane, 2,6-dimethyl-                             | 18952 | 002051-30-1  | 89 |
| 44 | 8.563 | 0.04 | (Trimethylsilyl)acetylene                         | 3050  | 001066-54-2  | 50 |
|    |       |      | 2-Pentene, 4,4-dimethyl-                          | 3325  | 026232-98-4  | 50 |
|    |       |      | 2-Pentene, 3,4-dimethyl-, (E)-                    | 3370  | 004914-92-5  | 47 |
| 45 | 8.681 | 0.04 | Thiophene, 2-(3-methylbutyl)-                     | 27278 | 026963-33-7  | 43 |
|    |       |      | Thiophene, 2-methyl-                              | 3094  | 000554-14-3  | 38 |
|    |       |      | Octane, 2,3-dimethyl-                             | 18946 | 007146-60-3  | 38 |

|    |        |      |                                                                             |        |                 |
|----|--------|------|-----------------------------------------------------------------------------|--------|-----------------|
| 46 | 8.753  | 0.01 |                                                                             |        |                 |
|    |        |      | 3-Hexene, 2,3-dimethyl-                                                     | 6657   | 007145-23-5 43  |
|    |        |      | 2,4-Dimethyl-3-hexene(c,t)                                                  | 6669   | 1000118-16-4 42 |
|    |        |      | 3-Hexene, 2,4-dimethyl-                                                     | 6642   | 082085-14-1 38  |
| 47 | 9.430  | 0.02 |                                                                             |        |                 |
|    |        |      | 2-Pentene, 4,4-dimethyl-, (E)-                                              | 3374   | 000690-08-4 52  |
|    |        |      | 2-Pentene, 3,4-dimethyl-                                                    | 3324   | 024910-63-2 52  |
|    |        |      | 2-Pentene, 4,4-dimethyl-                                                    | 3325   | 026232-98-4 50  |
| 48 | 9.559  | 0.10 |                                                                             |        |                 |
|    |        |      | Cyclohexane, 1,1,3,5-tetramethyl-, trans-                                   | 17843  | 050876-31-8 45  |
|    |        |      | 3-Heptene, 2,2,3,5,6-pentamethyl-                                           | 36065  | 116164-06-8 43  |
|    |        |      | Cyclohexane, 1,1,3,5-tetramethyl-, cis-                                     | 17837  | 050876-32-9 43  |
| 49 | 9.615  | 0.03 |                                                                             |        |                 |
|    |        |      | cis,cis,cis-1-Isobutyl-2,5-dimethylcyclohexane                              | 36080  | 1000113-60-0 68 |
|    |        |      | Cyclohexane, 1,4-dimethyl-2-(2-methylpropyl)-, (1.alpha.,2.beta.,5.alpha.)- | 36083  | 054411-17-5 64  |
|    |        |      | 3-Isopropyl-5-methyl-hex-4-en-2-on                                          | 26309  | 077142-85-9 64  |
| 50 | 9.846  | 0.01 |                                                                             |        |                 |
|    |        |      | 2,2-Dimethylvaleric acid                                                    | 13300  | 001185-39-3 47  |
|    |        |      | Pentanoic acid, 6-ethyl-3-octyl ester                                       | 91860  | 1000282-73-6 43 |
|    |        |      | Hexane, 1,1'-oxybis-                                                        | 49056  | 000112-58-3 38  |
| 51 | 10.031 | 0.03 |                                                                             |        |                 |
|    |        |      | Cyclohexane, 1-methyl-2-pentyl-                                             | 36058  | 054411-01-7 72  |
|    |        |      | Cyclopentanecarboxylic acid, 4-hexadecyl ester                              | 164250 | 1000282-77-5 59 |
|    |        |      | Thiophene, 2-hexyl-                                                         | 35779  | 018794-77-9 59  |
| 52 | 10.134 | 0.05 |                                                                             |        |                 |
|    |        |      | 3-Hexene, 2,3-dimethyl-                                                     | 6643   | 007145-23-5 64  |
|    |        |      | Cyclopentane, 1,1,3,4-tetramethyl-, cis-                                    | 11502  | 053907-60-1 47  |
|    |        |      | 2,4-Dimethyl-3-hexene(c,t)                                                  | 6669   | 1000118-16-4 45 |
| 53 | 10.288 | 0.03 |                                                                             |        |                 |
|    |        |      | 3-Heptene, 2,2,3,5,6-pentamethyl-                                           | 36065  | 116164-06-8 76  |
|    |        |      | 3-Methyl-1-dodecyn-3-ol                                                     | 56485  | 024424-78-0 47  |

|    |        |      |                                                      |        |              |    |
|----|--------|------|------------------------------------------------------|--------|--------------|----|
|    |        |      | 2-Pentene, 4-methyl-, (Z)-                           | 1510   | 000691-38-3  | 46 |
| 54 | 10.760 | 0.03 |                                                      |        |              |    |
|    |        |      | Pentanenitrile, 4,4-dimethyl-5-oxo                   | 10743  | 006140-61-0  | 30 |
|    |        |      | Trichloroacetic acid, 1-cyclopentylethyl ester       | 104526 | 1000282-57-1 | 27 |
|    |        |      | Cyclopentane, 1-hydroxymethyl-1,3-dimethyl-          | 12512  | 1000156-73-8 | 27 |
| 55 | 13.302 | 1.83 |                                                      |        |              |    |
|    |        |      | Propyl aldoxime, 2-methyl-, anti-                    | 1892   | 005775-73-5  | 27 |
|    |        |      | 2,5-Cyclohexadien-1-one, 3,5-dihydroxy-4,4-dimethyl- | 26970  | 002065-00-1  | 27 |
|    |        |      | Propyl aldoxime, 2-methyl-, syn-                     | 1891   | 005780-39-2  | 16 |
| 56 | 13.405 | 0.73 |                                                      |        |              |    |
|    |        |      | Propyl aldoxime, 2-methyl-, anti-                    | 1892   | 005775-73-5  | 27 |
|    |        |      | 1H-Indole-3-acetamide, N,N-dimethyl- $\alpha$ -oxo-  | 71452  | 029095-44-1  | 18 |
|    |        |      | Propyl aldoxime, 2-methyl-, syn-                     | 1891   | 005780-39-2  | 16 |
| 57 | 13.934 | 0.85 |                                                      |        |              |    |
|    |        |      | Azetidine, n-propyl-                                 | 3511   |              | 39 |
|    |        |      | Cyclohexanamine, N-methyl-N-nitroso-                 | 19293  | 005432-28-0  | 38 |
|    |        |      | Cyclohexanol, 2-amino-1-methyl-4-(1-methylethyl)-    | 27360  | 006756-99-6  | 9  |
| 58 | 15.254 | 0.12 |                                                      |        |              |    |
|    |        |      | 1-Methoxy-2,3-cis-dimethylaziridine (sin)            | 4101   | 061593-25-7  | 47 |
|    |        |      | Azetidine, 1,1'-methylenebis-                        | 11113  | 038455-24-2  | 47 |
|    |        |      | 1-Methoxy-2,3-trans-dimethylaziridine                | 4100   | 1000283-23-4 | 28 |
| 59 | 18.602 | 9.33 |                                                      |        |              |    |
|    |        |      | Azetidine, n-propyl-                                 | 3511   |              | 16 |
|    |        |      | 1-Methoxy-2,3-cis-dimethylaziridine (sin)            | 4101   | 061593-25-7  | 12 |
|    |        |      | Phosphine oxide, methyldiphenyl-                     | 71649  | 002129-89-7  | 12 |
| 60 | 18.664 | 0.55 |                                                      |        |              |    |
|    |        |      | Decyl alcohol, tert-butyl dimethylsilyl ether        | 115281 | 1000333-00-5 | 22 |
|    |        |      | Azetidine, n-propyl-                                 | 3511   |              | 16 |

|    |        |      |                                              |        |              |    |
|----|--------|------|----------------------------------------------|--------|--------------|----|
|    |        |      | 1-Methoxy-2,3-cis-dimethylaziridine (sin)    | 4101   | 061593-25-7  | 12 |
| 61 | 18.705 | 1.45 |                                              |        |              |    |
|    |        |      | Decyl alcohol, tert-butyldimethylsilyl ether | 115281 | 1000333-00-5 | 22 |
|    |        |      | 1-Methoxy-2,3-cis-dimethylaziridine (sin)    | 4101   | 061593-25-7  | 12 |
|    |        |      | (S)-(+)-2-Pyrrolidinemethanol                | 4081   | 023356-96-9  | 10 |
| 62 | 18.787 | 0.50 |                                              |        |              |    |
|    |        |      | Azetidine, n-propyl-                         | 3511   |              | 16 |
|    |        |      | 1-Methoxy-2,3-cis-dimethylaziridine (sin)    | 4101   | 061593-25-7  | 12 |
|    |        |      | Nonanoic acid, tert-butyldimethylsilyl ester | 115100 | 104255-73-4  | 12 |
| 63 | 18.818 | 1.27 |                                              |        |              |    |
|    |        |      | Azetidine, n-propyl-                         | 3511   |              | 25 |
|    |        |      | 1-Methoxy-2,3-cis-dimethylaziridine (sin)    | 4101   | 061593-25-7  | 17 |
|    |        |      | Decyl alcohol, tert-butyldimethylsilyl ether | 115281 | 1000333-00-5 | 10 |
| 64 | 18.900 | 1.06 |                                              |        |              |    |
|    |        |      | Azetidine, n-propyl-                         | 3511   |              | 25 |
|    |        |      | (S)-(+)-2-Pyrrolidinemethanol                | 4078   | 023356-96-9  | 10 |
|    |        |      | Nonanoic acid, tert-butyldimethylsilyl ester | 115100 | 104255-73-4  | 10 |
| 65 | 18.972 | 1.47 |                                              |        |              |    |
|    |        |      | Azetidine, n-propyl-                         | 3511   |              | 25 |
|    |        |      | (S)-(+)-2-Pyrrolidinemethanol                | 4078   | 023356-96-9  | 10 |
|    |        |      | Nonanoic acid, tert-butyldimethylsilyl ester | 115100 | 104255-73-4  | 10 |
| 66 | 19.064 | 0.55 |                                              |        |              |    |
|    |        |      | 1-Oxa-3,4-diazacyclopentadiene               | 494    | 000288-99-3  | 35 |
|    |        |      | Azetidine, n-propyl-                         | 3511   |              | 25 |
|    |        |      | (S)-(+)-2-Pyrrolidinemethanol                | 4081   | 023356-96-9  | 10 |
| 67 | 19.126 | 1.07 |                                              |        |              |    |
|    |        |      | 1-Oxa-3,4-diazacyclopentadiene               | 494    | 000288-99-3  | 35 |
|    |        |      | Azetidine, n-propyl-                         | 3511   |              | 25 |

|    |        |      |                                                                                              |        |              |    |
|----|--------|------|----------------------------------------------------------------------------------------------|--------|--------------|----|
|    |        |      | 1-Methoxy-2,3-cis-dimethylaziridine (sin)                                                    | 4101   | 061593-25-7  | 17 |
| 68 | 19.239 | 1.32 |                                                                                              |        |              |    |
|    |        |      | 1-Oxa-3,4-diazacyclopentadiene                                                               | 494    | 000288-99-3  | 35 |
|    |        |      | Azetidine, n-propyl-                                                                         | 3511   |              | 17 |
|    |        |      | 1-Methoxy-2,3-cis-dimethylaziridine (sin)                                                    | 4101   | 061593-25-7  | 17 |
| 69 | 19.290 | 0.86 |                                                                                              |        |              |    |
|    |        |      | (S)-(+)-2-Pyrrolidinemethanol                                                                | 4078   | 023356-96-9  | 10 |
|    |        |      | 2H-Pyran-2,6(3H)-dione, dihydro-                                                             | 7058   | 000108-55-4  | 10 |
|    |        |      | L-Proline, ethyl ester                                                                       | 19969  | 005817-26-5  | 10 |
| 70 | 19.321 | 1.52 |                                                                                              |        |              |    |
|    |        |      | Azetidine, n-propyl-                                                                         | 3511   |              | 17 |
|    |        |      | L-Proline, ethyl ester                                                                       | 19969  | 005817-26-5  | 10 |
|    |        |      | Nonanoic acid, tert-butyldimethylsilyl ester                                                 | 115100 | 104255-73-4  | 10 |
| 71 | 22.115 | 0.31 |                                                                                              |        |              |    |
|    |        |      | 1-Oxa-3,4-diazacyclopentadiene                                                               | 494    | 000288-99-3  | 25 |
|    |        |      | 1-Methoxy-2,3-cis-dimethylaziridine (sin)                                                    | 4101   | 061593-25-7  | 17 |
|    |        |      | N,N'-di-2-Naphthyl-p-phenylenediamine                                                        | 177646 | 000093-46-9  | 14 |
| 72 | 22.505 | 0.09 |                                                                                              |        |              |    |
|    |        |      | Benzoic acid, 4-(3,4-dihydro-2,4-dioxo-2H-pyrimido[4,5-b]quinolin-10-yl)-, ethyl ester       | 177893 | 317326-96-8  | 27 |
|    |        |      | 1-Methoxy-2,3-cis-dimethylaziridine (sin)                                                    | 4101   | 061593-25-7  | 25 |
|    |        |      | 1-Oxa-3,4-diazacyclopentadiene                                                               | 494    | 000288-99-3  | 25 |
| 73 | 22.659 | 0.30 |                                                                                              |        |              |    |
|    |        |      | 3-Amino-6-nitro-4-phenylsulfanylbenzo[b]thiophene-2-carboxylic acid methyl ester             | 177075 | 1000275-36-3 | 38 |
|    |        |      | 2-Quinolinecarboxylic acid, 4-[(tert-butyldimethylsilyl)oxy]-, tert-butyldimethylsilyl ester | 200507 | 1000221-71-1 | 17 |
|    |        |      | Thianthrene, octafluoro-                                                                     | 176996 | 016012-83-2  | 16 |

74 22.808 0.48

|                                                                                                |        |              |    |
|------------------------------------------------------------------------------------------------|--------|--------------|----|
| Thianthrene, octafluoro-                                                                       | 176996 | 016012-83-2  | 25 |
| 2-Quinolinecarboxylic acid, 4-[(tert-butyl)dimethylsilyl]oxy]-, tert-butyl dimethylsilyl ester | 200507 | 1000221-71-1 | 23 |
| 6,7-Dimethyl-2-(4-prop-2-ynoxy-benzylidene)-benzo[4,5]imidazo[2,1-b]thiazol-3-one              | 177375 | 1000296-51-8 | 9  |

75 22.936 0.35

|                                                                                                |        |              |    |
|------------------------------------------------------------------------------------------------|--------|--------------|----|
| Thianthrene, octafluoro-                                                                       | 176996 | 016012-83-2  | 25 |
| 2-Quinolinecarboxylic acid, 4-[(tert-butyl)dimethylsilyl]oxy]-, tert-butyl dimethylsilyl ester | 200507 | 1000221-71-1 | 23 |
| 5.alpha.-Pregnane-12,20-dione, cyclic 12-(ethylene acetal)                                     | 177585 | 005618-27-9  | 9  |

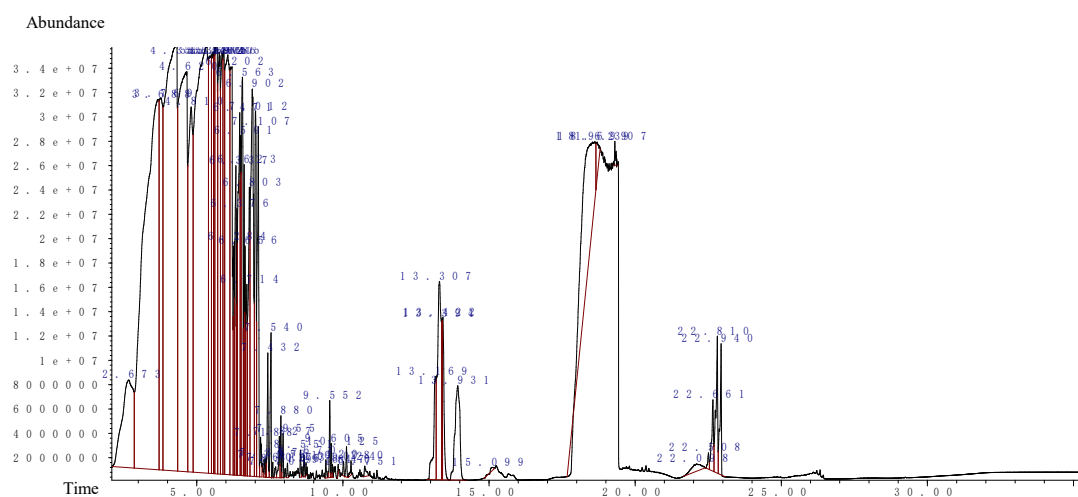

| Peak | R.T.  | Area% | Material                                                      | Reference | CAS         | Mass |
|------|-------|-------|---------------------------------------------------------------|-----------|-------------|------|
| 1    | 2.672 | 2.32  |                                                               |           |             |      |
|      |       |       | 2-Pentene, 3-methyl-, (Z)-                                    | 1506      | 000922-62-3 | 64   |
|      |       |       | 2-Pentene, 3-methyl-                                          | 1466      | 000922-61-2 | 64   |
|      |       |       | 2-Pentene, 3-methyl-, (Z)-                                    | 1508      | 000922-62-3 | 62   |
| 2    | 3.689 | 12.92 |                                                               |           |             |      |
|      |       |       | Hexane, 3-methyl-                                             | 3944      | 000589-34-4 | 59   |
|      |       |       | Heptane                                                       | 3943      | 000142-82-5 | 58   |
|      |       |       | Hexane, 3,3,4-trimethyl-                                      | 12579     | 016747-31-2 | 47   |
| 3    | 3.771 | 2.93  |                                                               |           |             |      |
|      |       |       | Hexane, 3-methyl-                                             | 3944      | 000589-34-4 | 59   |
|      |       |       | Heptane                                                       | 3943      | 000142-82-5 | 58   |
|      |       |       | Hexane, 3,3,4-trimethyl-                                      | 12579     | 016747-31-2 | 47   |
| 4    | 4.310 | 12.02 |                                                               |           |             |      |
|      |       |       | 1-Heptene                                                     | 3269      | 000592-76-7 | 46   |
|      |       |       | Cycloheptane                                                  | 3273      | 000291-64-5 | 45   |
|      |       |       | Cyclohexane, methyl-                                          | 3312      | 000108-87-2 | 43   |
| 5    | 4.619 | 7.97  |                                                               |           |             |      |
|      |       |       | Cyclohexane, methyl-                                          | 3312      | 000108-87-2 | 52   |
|      |       |       | Cycloheptane                                                  | 3274      | 000291-64-5 | 43   |
|      |       |       | 3-Penten-2-one, 4-methyl-                                     | 3203      | 000141-79-7 | 43   |
| 6    | 4.809 | 3.74  |                                                               |           |             |      |
|      |       |       | Cyclopentane, 1,3-dimethyl-                                   | 3364      | 002453-00-1 | 46   |
|      |       |       | Pentane, 3-ethyl-2-methyl-                                    | 7593      | 000609-26-7 | 43   |
|      |       |       | Cyclopentane, 1,2,3-trimethyl-, (1.alpha.,2.alpha.,3.alpha.)- | 6770      | 002613-69-6 | 43   |
| 7    | 5.343 | 12.51 |                                                               |           |             |      |
|      |       |       | Octane, 4-methyl-                                             | 12531     | 002216-34-4 | 46   |
|      |       |       | Hexane, 2,3,4-trimethyl-                                      | 12578     | 000921-47-1 | 46   |
|      |       |       | Hexane, 2,3,4-trimethyl-                                      | 12570     | 000921-47-1 | 43   |
| 8    | 5.492 | 2.57  |                                                               |           |             |      |
|      |       |       | 1-Octene                                                      | 6558      | 000111-66-0 | 45   |
|      |       |       | Heptane, 2-methyl-                                            | 7560      | 000592-27-8 | 38   |
|      |       |       | Octane                                                        | 7547      | 000111-65-9 | 38   |

|    |       |      |                                        |       |                |
|----|-------|------|----------------------------------------|-------|----------------|
| 9  | 5.553 | 1.75 |                                        |       |                |
|    |       |      | Octane                                 | 7546  | 000111-65-9 43 |
|    |       |      | Heptane, 3-methyl-                     | 7552  | 000589-81-1 43 |
|    |       |      | Heptane, 2-methyl-                     | 7560  | 000592-27-8 41 |
| 10 | 5.605 | 1.14 |                                        |       |                |
|    |       |      | Octane                                 | 7548  | 000111-65-9 62 |
|    |       |      | Heptane, 3-methyl-                     | 7552  | 000589-81-1 55 |
|    |       |      | Hexane, 2,3,4-trimethyl-               | 12578 | 000921-47-1 52 |
| 11 | 5.666 | 2.43 |                                        |       |                |
|    |       |      | Heptane, 3-methyl-                     | 7556  | 000589-81-1 49 |
|    |       |      | Heptane, 3,4,5-trimethyl-              | 18959 | 020278-89-1 49 |
|    |       |      | Cyclobutane, 1,2-diethyl-, trans-      | 6747  | 019341-98-1 38 |
| 12 | 5.769 | 2.35 |                                        |       |                |
|    |       |      | Cyclohexane, 1,2-dimethyl-, trans-     | 6752  | 006876-23-9 89 |
|    |       |      | Cyclohexane, 1,2-dimethyl-, trans-     | 6756  | 006876-23-9 81 |
|    |       |      | Cyclohexane, 1,2-dimethyl-             | 6680  | 000583-57-3 70 |
| 13 | 5.866 | 2.01 |                                        |       |                |
|    |       |      | Cyclopentane, 1-ethyl-2-methyl-, c is- | 6763  | 000930-89-2 90 |
|    |       |      | Cyclopentane, 1-ethyl-2-methyl-        | 6730  | 003726-46-3 86 |
|    |       |      | Cyclopentane, 1-ethyl-2-methyl-, c is- | 6761  | 000930-89-2 86 |
| 14 | 5.928 | 1.53 |                                        |       |                |
|    |       |      | Hexyl octyl ether                      | 70362 | 017071-54-4 64 |
|    |       |      | Octane                                 | 7548  | 000111-65-9 52 |
|    |       |      | Cyclopentane, 1-ethyl-2-methyl-, c is- | 6763  | 000930-89-2 46 |
| 15 | 6.067 | 4.40 |                                        |       |                |
|    |       |      | Octane                                 | 7548  | 000111-65-9 83 |
|    |       |      | Pentane, 3-ethyl-2-methyl-             | 7595  | 000609-26-7 58 |
|    |       |      | Octane                                 | 7546  | 000111-65-9 50 |
| 16 | 6.200 | 2.33 |                                        |       |                |
|    |       |      | Octane                                 | 7548  | 000111-65-9 87 |
|    |       |      | Octane                                 | 7547  | 000111-65-9 72 |
|    |       |      | Octane                                 | 7546  | 000111-65-9 72 |



|    |       |      |                                                   |       |                 |
|----|-------|------|---------------------------------------------------|-------|-----------------|
| 17 | 6.282 | 0.65 |                                                   |       |                 |
|    |       |      | Heptane, 5-ethyl-2,2,3-trimethyl-                 | 37516 | 062199-06-8 53  |
|    |       |      | Pentane, 3-ethyl-2,2-dimethyl-                    | 12608 | 016747-32-3 50  |
|    |       |      | Heptane, 2,2-dimethyl-                            | 12569 | 001071-26-7 47  |
| 18 | 6.339 | 0.83 |                                                   |       |                 |
|    |       |      | Heptane, 2,3-dimethyl-                            | 12557 | 003074-71-3 58  |
|    |       |      | Heptane, 2,3-dimethyl-                            | 12547 | 003074-71-3 58  |
|    |       |      | Heptane, 2,4-dimethyl-                            | 12548 | 002213-23-2 53  |
| 19 | 6.375 | 0.48 |                                                   |       |                 |
|    |       |      | Cyclopentane, 1-ethyl-2-methyl-, cis-             | 6763  | 000930-89-2 89  |
|    |       |      | Cyclopentane, 1-ethyl-2-methyl-, cis-             | 6764  | 000930-89-2 70  |
|    |       |      | Cyclopentane, 1-ethyl-2-methyl-                   | 6730  | 003726-46-3 55  |
| 20 | 6.472 | 1.71 |                                                   |       |                 |
|    |       |      | Cyclooctane                                       | 6564  | 000292-64-8 46  |
|    |       |      | Caprolactam                                       | 6857  | 000105-60-2 38  |
|    |       |      | Cyclopentane, 1-ethyl-2-methyl-, c<br>is-         | 6764  | 000930-89-2 30  |
| 21 | 6.498 | 0.66 |                                                   |       |                 |
|    |       |      | Cyclopentane, propyl-                             | 6632  | 002040-96-2 49  |
|    |       |      | Cyclohexanone, 2-methyl-                          | 6456  | 000583-60-8 46  |
|    |       |      | Cyclooctane                                       | 6564  | 000292-64-8 46  |
| 22 | 6.565 | 1.49 |                                                   |       |                 |
|    |       |      | Heptane, 3,5-dimethyl-                            | 12549 | 000926-82-9 46  |
|    |       |      | Octane, 1,1'-oxybis-                              | 91963 | 000629-82-3 35  |
|    |       |      | Heptane, 2,5-dimethyl-                            | 12563 | 002216-30-0 30  |
| 23 | 6.621 | 0.63 |                                                   |       |                 |
|    |       |      | Cyclohexane, 1,1,3-trimethyl-                     | 11475 | 003073-66-3 64  |
|    |       |      | Cyclohexane, 1,1,3-trimethyl-                     | 11476 | 003073-66-3 58  |
|    |       |      | 2,4,6-Trimethyl-1,5-diazabicyclo[3<br>.1.0]hexane | 11139 | 1000283-21-2 50 |
| 24 | 6.657 | 0.40 |                                                   |       |                 |
|    |       |      | 2-Butanone, oxime                                 | 1864  | 000096-29-7 46  |
|    |       |      | 2-Butanone, oxime                                 | 1865  | 000096-29-7 46  |
|    |       |      | 2-Butanone, oxime                                 | 1863  | 000096-29-7 46  |
| 25 | 6.714 | 0.54 |                                                   |       |                 |
|    |       |      | 2-Butanone, oxime                                 | 1863  | 000096-29-7 93  |

|    |       |      |                                      |        |              |    |
|----|-------|------|--------------------------------------|--------|--------------|----|
|    |       |      | 2-Butanone, oxime                    | 1865   | 000096-29-7  | 86 |
|    |       |      | 2-Butanone, oxime                    | 1864   | 000096-29-7  | 64 |
| 26 | 6.801 | 1.16 |                                      |        |              |    |
|    |       |      | 2-Butanone, oxime                    | 1864   | 000096-29-7  | 90 |
|    |       |      | 2-Butanone, oxime                    | 1865   | 000096-29-7  | 60 |
|    |       |      | 2-Octanone, O-methyloxime            | 28948  | 036382-59-9  | 35 |
| 27 | 6.904 | 2.68 |                                      |        |              |    |
|    |       |      | 2-Butanone, oxime                    | 1864   | 000096-29-7  | 64 |
|    |       |      | 2-Butanone, oxime                    | 1865   | 000096-29-7  | 50 |
|    |       |      | 2-Butanone, oxime                    | 1863   | 000096-29-7  | 50 |
| 28 | 7.012 | 1.28 |                                      |        |              |    |
|    |       |      | 1H-Indole, 5,6,7-trimethyl-          | 29912  | 054340-99-7  | 30 |
|    |       |      | Isoxazole, 5-methyl-3-phenyl-        | 29883  | 001008-74-8  | 27 |
|    |       |      | 2,3,5,6-Tetramethylphenylcyanide     | 29924  | 002571-53-1  | 27 |
| 29 | 7.109 | 1.26 |                                      |        |              |    |
|    |       |      | o-Xylene                             | 5039   | 000095-47-6  | 91 |
|    |       |      | p-Xylene                             | 5030   | 000106-42-3  | 91 |
|    |       |      | p-Xylene                             | 5032   | 000106-42-3  | 91 |
| 30 | 7.186 | 0.11 |                                      |        |              |    |
|    |       |      | 1,7-Octadiene, 2,3,3-trimethyl-      | 25014  | 1000150-47-7 | 53 |
|    |       |      | Oxalic acid, cyclohexyl pentyl ester | 91473  | 1000309-30-6 | 43 |
|    |       |      | Oxalic acid, cyclohexyl nonyl ester  | 135072 | 1000309-31-1 | 43 |
| 31 | 7.304 | 0.04 |                                      |        |              |    |
|    |       |      | Cyclopentane, 1-methyl-2-propyl-     | 11484  | 003728-57-2  | 90 |
|    |       |      | 3-Nonene, (E)-                       | 11389  | 020063-92-7  | 58 |
|    |       |      | 3-Heptene, 2,6-dimethyl-             | 11434  | 002738-18-3  | 53 |
| 32 | 7.366 | 0.03 |                                      |        |              |    |
|    |       |      | cis-1-Ethyl-3-methyl-cyclohexane     | 11486  | 019489-10-2  | 95 |
|    |       |      | 1-Ethyl-3-methylcyclohexane (c,t)    | 11488  | 003728-55-0  | 93 |
|    |       |      | 1-Ethyl-4-methylcyclohexane          | 11451  | 003728-56-1  | 76 |
| 33 | 7.433 | 0.26 |                                      |        |              |    |
|    |       |      | o-Xylene                             | 5031   | 000095-47-6  | 95 |
|    |       |      | p-Xylene                             | 5033   | 000106-42-3  | 95 |
|    |       |      | o-Xylene                             | 5039   | 000095-47-6  | 95 |
| 34 | 7.541 | 0.32 |                                      |        |              |    |

|    |       |      |                                                     |       |              |    |
|----|-------|------|-----------------------------------------------------|-------|--------------|----|
|    |       |      | Nonane                                              | 12526 | 000111-84-2  | 95 |
|    |       |      | Nonane                                              | 12527 | 000111-84-2  | 95 |
|    |       |      | Nonane                                              | 12528 | 000111-84-2  | 83 |
| 35 | 7.602 | 0.02 |                                                     |       |              |    |
|    |       |      | Cyclopentanone, 2-(1-methylpropyl)                  | 18536 | 006376-92-7  | 27 |
|    |       |      | 1-Methoxy-4,4-dimethyl-cyclohex-1-ene               | 18548 | 073741-65-8  | 25 |
|    |       |      | 1-Propanamine, 2-methyl-N-(2-methylpropylidene)-    | 11802 | 006898-82-4  | 22 |
| 36 | 7.700 | 0.03 |                                                     |       |              |    |
|    |       |      | cis-1-Ethyl-3-methyl-cyclohexane                    | 11486 | 019489-10-2  | 42 |
|    |       |      | 1-Ethyl-4-methylcyclohexane                         | 11451 | 003728-56-1  | 42 |
|    |       |      | Cyclohexane, 1-ethyl-4-methyl-, trans-              | 11501 | 006236-88-0  | 38 |
| 37 | 7.828 | 0.11 |                                                     |       |              |    |
|    |       |      | Cyclopentane, 1,2,3,4,5-pentamethyl-                | 17833 | 1000152-79-7 | 64 |
|    |       |      | 2H-Pyran, 3,4-dihydro-                              | 1415  | 000110-87-2  | 47 |
|    |       |      | Perdeuterobenzene                                   | 1442  | 001076-43-3  | 46 |
| 38 | 7.879 | 0.11 |                                                     |       |              |    |
|    |       |      | Cyclohexane, 1-methyl-4-(1-methyl-4-ethyl)-, trans- | 17856 | 001678-82-6  | 64 |
|    |       |      | Cyclohexane, 1-methyl-4-(1-methyl-4-ethyl)-, cis-   | 17852 | 006069-98-3  | 58 |
|    |       |      | 3-Cyclohexen-1-ol, 3-methyl-                        | 6513  | 053783-91-8  | 53 |
| 39 | 7.957 | 0.09 |                                                     |       |              |    |
|    |       |      | Cyclopentane, 1,2,3,4,5-pentamethyl-                | 17833 | 1000152-79-7 | 64 |
|    |       |      | Furan, 2,3-dihydro-3-methyl-                        | 1438  | 001708-27-6  | 43 |
|    |       |      | 3-Penten-2-one                                      | 1390  | 000625-33-2  | 38 |
| 40 | 8.105 | 0.03 |                                                     |       |              |    |
|    |       |      | Octane, 2,6-dimethyl-                               | 18948 | 002051-30-1  | 93 |
|    |       |      | Octane, 3,6-dimethyl-                               | 18953 | 015869-94-0  | 90 |
|    |       |      | Octane, 2,6-dimethyl-                               | 18952 | 002051-30-1  | 89 |
| 41 | 8.552 | 0.05 |                                                     |       |              |    |
|    |       |      | 2-Pentene, 4,4-dimethyl-                            | 3325  | 026232-98-4  | 50 |
|    |       |      | 1H-Pyrazole, 4,5-dihydro-4,5-dimethyl-              | 3045  | 028019-94-5  | 49 |
|    |       |      | 2-Pentene, 4,4-dimethyl-, (Z)-                      | 3373  | 000762-63-0  | 47 |
| 42 | 8.670 | 0.04 |                                                     |       |              |    |

|    |        |      |                                                                             |        |              |    |
|----|--------|------|-----------------------------------------------------------------------------|--------|--------------|----|
|    |        |      | Cyclohexanone, 4-(1,1-dimethylethyl)-                                       | 26328  | 000098-53-3  | 38 |
|    |        |      | Thiophene, 3-methyl-                                                        | 3100   | 000616-44-4  | 38 |
|    |        |      | Sulfurous acid, cyclohexylmethyl isohexyl ester                             | 106953 | 1000309-21-5 | 35 |
| 43 | 8.737  | 0.02 |                                                                             |        |              |    |
|    |        |      | 3-Hexene, 2,4-dimethyl-                                                     | 6642   | 082085-14-1  | 49 |
|    |        |      | 3-Hexene, 2,3-dimethyl-                                                     | 6643   | 007145-23-5  | 43 |
|    |        |      | 2-Pentene, 3-ethyl-2-methyl-                                                | 6708   | 019780-67-7  | 43 |
| 44 | 9.420  | 0.04 |                                                                             |        |              |    |
|    |        |      | 2-Pentene, 4,4-dimethyl-, (E)-                                              | 3374   | 000690-08-4  | 52 |
|    |        |      | 2-Pentene, 3,4-dimethyl-                                                    | 3324   | 024910-63-2  | 52 |
|    |        |      | Cyclopropane, 1,1,2,2-tetramethyl-                                          | 3387   | 004127-47-3  | 50 |
| 45 | 9.554  | 0.14 |                                                                             |        |              |    |
|    |        |      | 2,2,4-Trimethyl-3-hexene                                                    | 11429  | 059643-72-0  | 46 |
|    |        |      | 3-Heptene, 2,2,3,5,6-pentamethyl-                                           | 36065  | 116164-06-8  | 43 |
|    |        |      | Cyclopentanecarboxylic acid, 4-nitrophenyl ester                            | 86074  | 1000307-58-0 | 35 |
| 46 | 9.605  | 0.05 |                                                                             |        |              |    |
|    |        |      | cis,cis,cis-1-Isobutyl-2,5-dimethylcyclohexane                              | 36080  | 1000113-60-0 | 74 |
|    |        |      | 3-Isopropyl-5-methyl-hex-4-en-2-one                                         | 26309  | 077142-85-9  | 68 |
|    |        |      | Cyclohexane, 1,4-dimethyl-2-(2-methylpropyl)-, (1.alpha.,2.beta.,5.alpha.)- | 36083  | 054411-17-5  | 64 |
| 47 | 9.646  | 0.02 |                                                                             |        |              |    |
|    |        |      | 2-Pyrrolidinone                                                             | 1535   | 000616-45-5  | 50 |
|    |        |      | 2-Pyrrolidinone                                                             | 1533   | 000616-45-5  | 50 |
|    |        |      | Oxalic acid, diisohexyl ester                                               | 103928 | 1000309-32-9 | 43 |
| 48 | 9.841  | 0.01 |                                                                             |        |              |    |
|    |        |      | Pentanoic acid, 6-ethyl-3-octyl ester                                       | 91860  | 1000282-73-6 | 43 |
|    |        |      | Malonic acid, dodecyl 3-methylpentyl ester                                  | 175146 | 1000348-28-6 | 38 |
|    |        |      | 2-Pyrrolidinone                                                             | 1535   | 000616-45-5  | 38 |
| 49 | 10.026 | 0.03 |                                                                             |        |              |    |
|    |        |      | Cyclohexane, 1,1-dimethyl-                                                  | 6676   | 000590-66-9  | 59 |

|    |        |      |                                                      |        |              |    |
|----|--------|------|------------------------------------------------------|--------|--------------|----|
|    |        |      | Cyclohexane, 1,1-dimethyl-                           | 6683   | 000590-66-9  | 59 |
|    |        |      | Hept-2-ene, 2,4,4,6-tetramethyl-                     | 26616  | 103982-58-7  | 59 |
| 50 | 10.124 | 0.06 |                                                      |        |              |    |
|    |        |      | 3-Hexene, 2,3-dimethyl-                              | 6657   | 007145-23-5  | 59 |
|    |        |      | 2,4-Dimethyl-3-hexene(c,t)                           | 6669   | 1000118-16-4 | 45 |
|    |        |      | 3-Hexene, 3,4-dimethyl-                              | 6641   | 030951-95-2  | 38 |
| 51 | 10.278 | 0.03 |                                                      |        |              |    |
|    |        |      | 1-Pentyn-1-ol, 4-methyl-                             | 3187   | 053778-57-7  | 47 |
|    |        |      | cis,cis,cis-1-Isobutyl-2,5-dimethylcyclohexane       | 36080  | 1000113-60-0 | 38 |
|    |        |      | Cyclohexane, 1-ethyl-1,3-dimethyl-, trans-           | 17849  | 062238-29-3  | 38 |
| 52 | 10.750 | 0.05 |                                                      |        |              |    |
|    |        |      | 2-Cyclohexen-1-ol, 1-methyl-                         | 6511   | 023758-27-2  | 43 |
|    |        |      | Cyclohexane, 1,2-dimethyl-, cis-                     | 6740   | 002207-01-4  | 41 |
|    |        |      | 2-Hexenal, (E)-                                      | 3145   | 006728-26-3  | 38 |
| 53 | 13.169 | 0.60 |                                                      |        |              |    |
|    |        |      | 1H-Indole-3-acetamide, N,N-dimethyl- $\alpha$ -oxo-  | 71452  | 029095-44-1  | 18 |
|    |        |      | Propyl aldoxime, 2-methyl-, syn-                     | 1891   | 005780-39-2  | 16 |
|    |        |      | Azetidine, n-propyl-                                 | 3511   |              | 16 |
| 54 | 13.307 | 1.71 |                                                      |        |              |    |
|    |        |      | Propyl aldoxime, 2-methyl-, anti-                    | 1892   | 005775-73-5  | 27 |
|    |        |      | 1H-Indole-3-acetamide, N,N-dimethyl- $\alpha$ -oxo-  | 71452  | 029095-44-1  | 18 |
|    |        |      | Propyl aldoxime, 2-methyl-, syn-                     | 1891   | 005780-39-2  | 16 |
| 55 | 13.395 | 0.28 |                                                      |        |              |    |
|    |        |      | Propyl aldoxime, 2-methyl-, syn-                     | 1891   | 005780-39-2  | 16 |
|    |        |      | 1-Oxa-3,4-diazacyclopentadiene                       | 494    | 000288-99-3  | 16 |
|    |        |      | Valine, N-methyl-N-methoxycarbonyl-, octadecyl ester | 205820 | 1000328-94-5 | 14 |
| 56 | 13.420 | 0.60 |                                                      |        |              |    |
|    |        |      | Propyl aldoxime, 2-methyl-, anti-                    | 1892   | 005775-73-5  | 27 |
|    |        |      | Propyl aldoxime, 2-methyl-, syn-                     | 1891   | 005780-39-2  | 16 |
|    |        |      | Alanine, N-methyl-n-propoxycarbonyl-, propyl ester   | 83208  | 1000329-42-9 | 14 |

|    |        |      |                                                                                   |        |                 |
|----|--------|------|-----------------------------------------------------------------------------------|--------|-----------------|
| 57 | 13.929 | 1.08 |                                                                                   |        |                 |
|    |        |      | Azetidine, n-propyl-                                                              | 3511   | 64              |
|    |        |      | Cyclohexanol, 2-amino-1-methyl-4-(1-methylethyl)-                                 | 27360  | 006756-99-6 9   |
|    |        |      | 1-n-Butoxy-2,3-dimethyldiaziridine                                                | 20073  | 343928-70-1 9   |
| 58 | 15.100 | 0.02 |                                                                                   |        |                 |
|    |        |      | 1-Methoxy-2,3-cis-dimethylaziridine (sin)                                         | 4101   | 061593-25-7 47  |
|    |        |      | 1-Oxa-3,4-diazacyclopentadiene                                                    | 494    | 000288-99-3 38  |
|    |        |      | Benzeneethanamine, N-(1-methylethylidene)-                                        | 30994  | 010433-34-8 27  |
| 59 | 18.628 | 3.57 |                                                                                   |        |                 |
|    |        |      | Decyl alcohol, tert-butyldimethylsilyl ether                                      | 115281 | 1000333-00-5 22 |
|    |        |      | Azetidine, n-propyl-                                                              | 3511   | 16              |
|    |        |      | 1-Methoxy-2,3-cis-dimethylaziridine (sin)                                         | 4101   | 061593-25-7 12  |
| 60 | 18.700 | 0.21 |                                                                                   |        |                 |
|    |        |      | 1-Methoxy-2,3-cis-dimethylaziridine (sin)                                         | 4101   | 061593-25-7 12  |
|    |        |      | 4-(Pyrrolidin-2-ylcarbonyl)morpholine                                             | 48074  | 1000305-37-7 10 |
|    |        |      | (S)-(+)-2-Pyrrolidinemethanol                                                     | 4081   | 023356-96-9 10  |
| 61 | 19.306 | 0.06 |                                                                                   |        |                 |
|    |        |      | Azetidine, n-propyl-                                                              | 3511   | 25              |
|    |        |      | Nonanoic acid, tert-butyldimethylsilyl ester                                      | 115100 | 104255-73-4 14  |
|    |        |      | (R)-(-)-2-Pyrrolidinemethanol                                                     | 4079   | 068832-13-3 10  |
| 62 | 22.099 | 0.17 |                                                                                   |        |                 |
|    |        |      | 1-Oxa-3,4-diazacyclopentadiene                                                    | 494    | 000288-99-3 25  |
|    |        |      | N,N'-di-2-Naphthyl-p-phenylenediamine                                             | 177646 | 000093-46-9 14  |
|    |        |      | 3-Amino-6-nitro-4-phenylsulfanyl-benzo[b]thiophene-2-carboxylic acid methyl ester | 177075 | 1000275-36-3 12 |
| 63 | 22.510 | 0.05 |                                                                                   |        |                 |
|    |        |      | Benzoic acid, 4-(3,4-dihydro-2,4-dioxo-2H-pyrimido[4,5-b]quinolin-10              | 177893 | 317326-96-8 27  |

|    |        |                                                    |        |              |    |
|----|--------|----------------------------------------------------|--------|--------------|----|
|    |        | -yl)-, ethyl ester                                 |        |              |    |
|    |        | 1-Methoxy-2,3-cis-dimethylaziridine (sin)          | 4101   | 061593-25-7  | 25 |
|    |        | 3-Amino-6-nitro-4-phenylsulfanyl-b                 | 177075 | 1000275-36-3 | 23 |
|    |        | enzo[b]thiophene-2-carboxylic acid<br>methyl ester |        |              |    |
| 64 | 22.659 | 0.31                                               |        |              |    |
|    |        | 3-Amino-6-nitro-4-phenylsulfanyl-b                 | 177075 | 1000275-36-3 | 38 |
|    |        | enzo[b]thiophene-2-carboxylic acid<br>methyl ester |        |              |    |
|    |        | 2-Quinolinecarboxylic acid, 4-[(te                 | 200507 | 1000221-71-1 | 17 |
|    |        | rt-butyldimethylsilyl)oxy]-, tert-                 |        |              |    |
|    |        | butyldimethylsilyl ester                           |        |              |    |
|    |        | Thianthrene, octafluoro-                           | 176996 | 016012-83-2  | 16 |
| 65 | 22.808 | 0.57                                               |        |              |    |
|    |        | 2-Quinolinecarboxylic acid, 4-[(te                 | 200507 | 1000221-71-1 | 17 |
|    |        | rt-butyldimethylsilyl)oxy]-, tert-                 |        |              |    |
|    |        | butyldimethylsilyl ester                           |        |              |    |
|    |        | Thianthrene, octafluoro-                           | 176996 | 016012-83-2  | 16 |
|    |        | Bis-(4-(2,5-dioxo-2,5-dihydropyrro                 | 177291 | 013132-94-0  | 9  |
|    |        | l-1-yl)-phenyl)-ether                              |        |              |    |
| 66 | 22.941 | 0.42                                               |        |              |    |
|    |        | Thianthrene, octafluoro-                           | 176996 | 016012-83-2  | 25 |
|    |        | 2-Quinolinecarboxylic acid, 4-[(te                 | 200507 | 1000221-71-1 | 23 |
|    |        | rt-butyldimethylsilyl)oxy]-, tert-                 |        |              |    |
|    |        | butyldimethylsilyl ester                           |        |              |    |
|    |        | 5.alpha.-Pregnane-12,20-dione, cyc                 | 177585 | 005618-27-9  | 9  |
|    |        | lic 12-(ethylene acetal)                           |        |              |    |

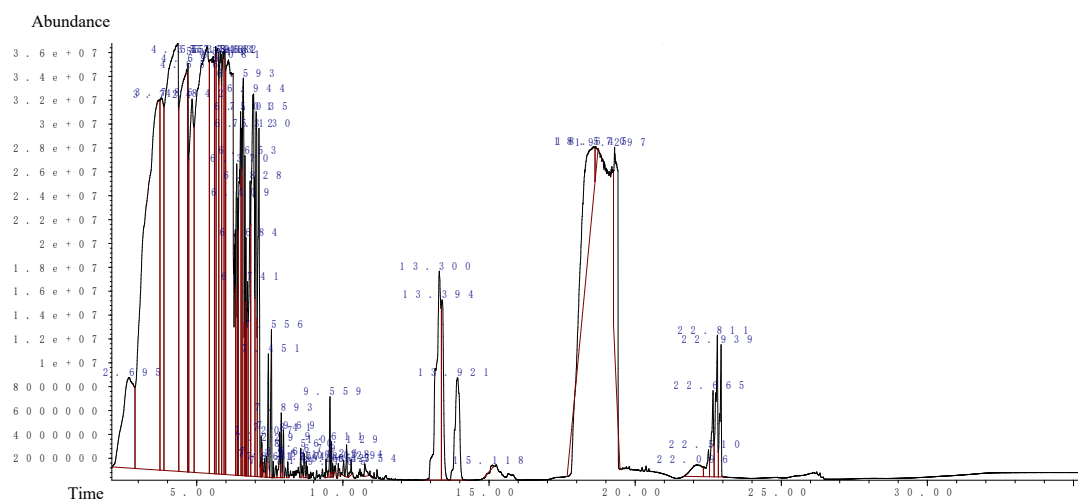

Figure 17 GC analysis of Experimental group 9

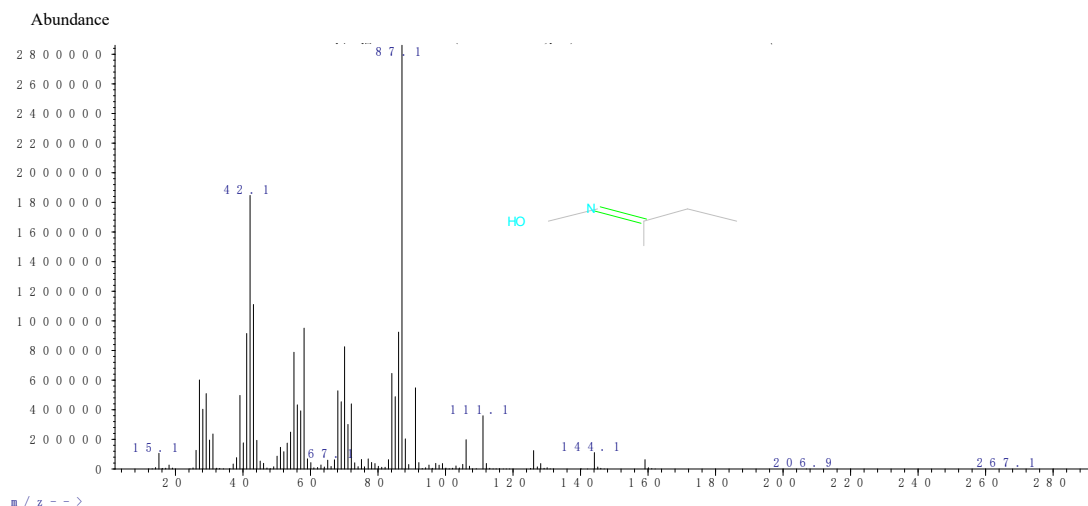

Figure 18 MS of Experimental group 9

| Peak | R.T.  | Area% | Material                   | Reference | CAS         | Mass |
|------|-------|-------|----------------------------|-----------|-------------|------|
| 1    | 2.693 | 2.41  |                            |           |             |      |
|      |       |       | 2-Pentene, 3-methyl-       | 1466      | 000922-61-2 | 64   |
|      |       |       | 2-Pentene, 3-methyl-, (Z)- | 1506      | 000922-62-3 | 64   |
|      |       |       | 2-Pentene, 3-methyl-, (Z)- | 1508      | 000922-62-3 | 62   |
| 2    | 3.725 | 12.92 |                            |           |             |      |
|      |       |       | Hexane, 3-methyl-          | 3944      | 000589-34-4 | 59   |
|      |       |       | Heptane                    | 3943      | 000142-82-5 | 58   |
|      |       |       | Heptane                    | 3941      | 000142-82-5 | 53   |
| 3    | 3.787 | 2.92  |                            |           |             |      |
|      |       |       | Hexane, 3-methyl-          | 3944      | 000589-34-4 | 59   |
|      |       |       | Heptane                    | 3943      | 000142-82-5 | 58   |
|      |       |       | Hexane, 3,3,4-trimethyl-   | 12579     | 016747-31-2 | 47   |
| 4    | 4.346 | 11.91 |                            |           |             |      |
|      |       |       | Cycloheptane               | 3275      | 000291-64-5 | 50   |
|      |       |       | 1-Heptene                  | 3269      | 000592-76-7 | 46   |
|      |       |       | Cycloheptane               | 3273      | 000291-64-5 | 45   |
| 5    | 4.654 | 6.88  |                            |           |             |      |
|      |       |       | Cyclohexane, methyl-       | 3312      | 000108-87-2 | 58   |
|      |       |       | 2-Pentene, 2,3-dimethyl-   | 3323      | 010574-37-5 | 43   |
|      |       |       | Cycloheptane               | 3274      | 000291-64-5 | 43   |
| 6    | 4.701 | 0.83  |                            |           |             |      |
|      |       |       | Cyclohexane, methyl-       | 3310      | 000108-87-2 | 52   |
|      |       |       | Cyclohexane, methyl-       | 3312      | 000108-87-2 | 47   |



|    |       |       |                                           |       |             |    |
|----|-------|-------|-------------------------------------------|-------|-------------|----|
|    |       |       | 1-Pentene, 2,3-dimethyl-                  | 3333  | 003404-72-6 | 43 |
| 7  | 4.844 | 3.76  |                                           |       |             |    |
|    |       |       | Cyclopentane, 1,3-dimethyl-               | 3364  | 002453-00-1 | 46 |
|    |       |       | 1-Hexene, 4-ethyl-                        | 6593  | 016746-85-3 | 41 |
|    |       |       | Heptane, 2-methyl-                        | 7560  | 000592-27-8 | 38 |
| 8  | 5.358 | 12.15 |                                           |       |             |    |
|    |       |       | Octane, 4-methyl-                         | 12531 | 002216-34-4 | 46 |
|    |       |       | Hexane, 2,3,4-trimethyl-                  | 12578 | 000921-47-1 | 43 |
|    |       |       | Hexane, 2,3,4-trimethyl-                  | 12570 | 000921-47-1 | 38 |
| 9  | 5.543 | 4.16  |                                           |       |             |    |
|    |       |       | Hexane, 3-methyl-                         | 3947  | 000589-34-4 | 38 |
|    |       |       | Heptane, 2-methyl-                        | 7560  | 000592-27-8 | 38 |
|    |       |       | Heptane, 3-methyl-                        | 7552  | 000589-81-1 | 38 |
| 10 | 5.646 | 1.35  |                                           |       |             |    |
|    |       |       | Octane                                    | 7548  | 000111-65-9 | 62 |
|    |       |       | Heptane, 3-methyl-                        | 7552  | 000589-81-1 | 55 |
|    |       |       | Hexane, 2,3,4-trimethyl-                  | 12578 | 000921-47-1 | 50 |
| 11 | 5.717 | 2.32  |                                           |       |             |    |
|    |       |       | Octane                                    | 7548  | 000111-65-9 | 49 |
|    |       |       | Cyclobutane, 1,2-diethyl-, trans-         | 6747  | 019341-98-1 | 30 |
|    |       |       | Piperidine                                | 1558  | 000110-89-4 | 30 |
| 12 | 5.815 | 2.33  |                                           |       |             |    |
|    |       |       | Cyclohexane, 1,2-dimethyl-                | 6680  | 000583-57-3 | 70 |
|    |       |       | Cyclohexane, 1,2-dimethyl-, trans-        | 6756  | 006876-23-9 | 70 |
|    |       |       | Cyclohexane, 1,2-dimethyl-                | 6671  | 000583-57-3 | 64 |
| 13 | 5.913 | 1.94  |                                           |       |             |    |
|    |       |       | Cyclopentane, 1-ethyl-2-methyl-, c<br>is- | 6763  | 000930-89-2 | 90 |
|    |       |       | Cyclopentane, 1-ethyl-2-methyl-           | 6730  | 003726-46-3 | 86 |
|    |       |       | Cyclopentane, 1-ethyl-2-methyl-, c<br>is- | 6761  | 000930-89-2 | 86 |
| 14 | 5.964 | 1.43  |                                           |       |             |    |
|    |       |       | Hexyl octyl ether                         | 70362 | 017071-54-4 | 64 |
|    |       |       | Octane                                    | 7548  | 000111-65-9 | 58 |
|    |       |       | 1,2-Cyclohexanedione                      | 6313  | 000765-87-7 | 45 |

|    |       |      |                                                   |       |                 |
|----|-------|------|---------------------------------------------------|-------|-----------------|
| 15 | 6.082 | 7.13 |                                                   |       |                 |
|    |       |      | Octane                                            | 7548  | 000111-65-9 83  |
|    |       |      | Pentane, 3-ethyl-2-methyl-                        | 7595  | 000609-26-7 58  |
|    |       |      | Octane                                            | 7546  | 000111-65-9 50  |
| 16 | 6.370 | 0.82 |                                                   |       |                 |
|    |       |      | Heptane, 2,3-dimethyl-                            | 12557 | 003074-71-3 58  |
|    |       |      | Heptane, 2,3-dimethyl-                            | 12547 | 003074-71-3 58  |
|    |       |      | Heptane, 2,4-dimethyl-                            | 12548 | 002213-23-2 53  |
| 17 | 6.411 | 0.49 |                                                   |       |                 |
|    |       |      | 2-Butanone, oxime                                 | 1864  | 000096-29-7 42  |
|    |       |      | 1-Octene                                          | 6558  | 000111-66-0 41  |
|    |       |      | Cyclopentane, 1-ethyl-2-methyl-                   | 6730  | 003726-46-3 41  |
| 18 | 6.503 | 1.66 |                                                   |       |                 |
|    |       |      | Cyclooctane                                       | 6564  | 000292-64-8 42  |
|    |       |      | Octane, 2,6-dimethyl-                             | 18952 | 002051-30-1 35  |
|    |       |      | Caprolactam                                       | 6857  | 000105-60-2 30  |
| 19 | 6.534 | 0.68 |                                                   |       |                 |
|    |       |      | Cyclopentane, propyl-                             | 6632  | 002040-96-2 49  |
|    |       |      | Cyclooctane                                       | 6564  | 000292-64-8 42  |
|    |       |      | Cyclohexanone, 2-methyl-                          | 6456  | 000583-60-8 38  |
| 20 | 6.590 | 1.44 |                                                   |       |                 |
|    |       |      | Heptane, 3,5-dimethyl-                            | 12549 | 000926-82-9 41  |
|    |       |      | 3-Ethylcyclopentanone                             | 6435  | 010264-55-8 38  |
|    |       |      | Heptane, 2,5-dimethyl-                            | 12550 | 002216-30-0 30  |
| 21 | 6.652 | 0.62 |                                                   |       |                 |
|    |       |      | Cyclohexane, 1,1,3-trimethyl-                     | 11475 | 003073-66-3 64  |
|    |       |      | Cyclohexane, 1,1,3-trimethyl-                     | 11476 | 003073-66-3 58  |
|    |       |      | 2,4,6-Trimethyl-1,5-diazabicyclo[3<br>.1.0]hexane | 11139 | 1000283-21-2 50 |
| 22 | 6.683 | 0.39 |                                                   |       |                 |
|    |       |      | 2-Butanone, oxime                                 | 1864  | 000096-29-7 46  |
|    |       |      | 2-Butanone, oxime                                 | 1863  | 000096-29-7 46  |
|    |       |      | 2-Cyclohexen-1-one, 4-hydroxy-                    | 6332  | 030182-12-8 15  |
| 23 | 6.739 | 0.52 |                                                   |       |                 |
|    |       |      | 2-Butanone, oxime                                 | 1863  | 000096-29-7 93  |
|    |       |      | 2-Butanone, oxime                                 | 1865  | 000096-29-7 86  |

|    |       |      |                                                             |       |              |    |
|----|-------|------|-------------------------------------------------------------|-------|--------------|----|
|    |       |      | 2-Butanone, oxime                                           | 1864  | 000096-29-7  | 70 |
| 24 | 6.827 | 1.13 |                                                             |       |              |    |
|    |       |      | 2-Butanone, oxime                                           | 1864  | 000096-29-7  | 90 |
|    |       |      | 2-Butanone, oxime                                           | 1863  | 000096-29-7  | 60 |
|    |       |      | 2-Butanone, oxime                                           | 1865  | 000096-29-7  | 60 |
| 25 | 6.945 | 2.67 |                                                             |       |              |    |
|    |       |      | Benzene, 1,3-dimethyl-                                      | 5055  | 000108-38-3  | 47 |
|    |       |      | Ethylbenzene                                                | 5042  | 000100-41-4  | 43 |
|    |       |      | o-Xylene                                                    | 5038  | 000095-47-6  | 35 |
| 26 | 7.037 | 1.28 |                                                             |       |              |    |
|    |       |      | 1H-Indole, 5,6,7-trimethyl-                                 | 29912 | 054340-99-7  | 30 |
|    |       |      | 2,3,5,6-Tetramethylphenylcyanide                            | 29924 | 002571-53-1  | 30 |
|    |       |      | Ethanone, 1-(1H-indol-3-yl)-                                | 29874 | 000703-80-0  | 27 |
| 27 | 7.130 | 1.25 |                                                             |       |              |    |
|    |       |      | p-Xylene                                                    | 5032  | 000106-42-3  | 92 |
|    |       |      | Benzene, 1,3-dimethyl-                                      | 5058  | 000108-38-3  | 92 |
|    |       |      | p-Xylene                                                    | 5030  | 000106-42-3  | 92 |
| 28 | 7.207 | 0.07 |                                                             |       |              |    |
|    |       |      | 1,7-Octadiene, 2,3,3-trimethyl-                             | 25014 | 1000150-47-7 | 53 |
|    |       |      | Cyclohexane, ethyl-                                         | 6602  | 001678-91-7  | 50 |
|    |       |      | Cyclohexanone, 3,3,5-trimethyl-                             | 18512 | 000873-94-9  | 47 |
| 29 | 7.227 | 0.04 |                                                             |       |              |    |
|    |       |      | Cyclohexane, 1,2,3-trimethyl-, (1.alpha.,2.beta.,3.alpha.)- | 11511 | 001678-81-5  | 60 |
|    |       |      | 1,3-Butadiene, 2-methyl-                                    | 460   | 000078-79-5  | 45 |
|    |       |      | Bicyclo[3.1.0]hexan-3-one                                   | 2792  | 001755-04-0  | 43 |
| 30 | 7.325 | 0.04 |                                                             |       |              |    |
|    |       |      | 1-Dodecanol                                                 | 49039 | 000112-53-8  | 58 |
|    |       |      | Cyclopentane, 1-methyl-2-propyl-                            | 11484 | 003728-57-2  | 55 |
|    |       |      | 2,3-Dimethyl-3-heptene, (Z)-                                | 11453 | 059643-73-1  | 49 |
| 31 | 7.386 | 0.03 |                                                             |       |              |    |
|    |       |      | cis-1-Ethyl-3-methyl-cyclohexane                            | 11486 | 019489-10-2  | 93 |
|    |       |      | 1-Ethyl-3-methylcyclohexane (c,t)                           | 11488 | 003728-55-0  | 91 |
|    |       |      | 1-Ethyl-4-methylcyclohexane                                 | 11451 | 003728-56-1  | 64 |
| 32 | 7.453 | 0.27 |                                                             |       |              |    |

|    |       |      |                                                      |       |              |    |
|----|-------|------|------------------------------------------------------|-------|--------------|----|
|    |       |      | p-Xylene                                             | 5033  | 000106-42-3  | 95 |
|    |       |      | p-Xylene                                             | 5032  | 000106-42-3  | 95 |
|    |       |      | o-Xylene                                             | 5031  | 000095-47-6  | 95 |
| 33 | 7.556 | 0.32 |                                                      |       |              |    |
|    |       |      | Nonane                                               | 12526 | 000111-84-2  | 95 |
|    |       |      | Nonane                                               | 12527 | 000111-84-2  | 94 |
|    |       |      | Nonane                                               | 12528 | 000111-84-2  | 83 |
| 34 | 7.618 | 0.02 |                                                      |       |              |    |
|    |       |      | 1-Methoxy-4,4-dimethyl-cyclohex-1-ene                | 18548 | 073741-65-8  | 32 |
|    |       |      | 1-Propanamine, 2-methyl-N-(2-methylpropylidene)-     | 11802 | 006898-82-4  | 27 |
|    |       |      | Cyclopentanone, 2-(1-methylpropyl)                   | 18536 | 006376-92-7  | 27 |
| 35 | 7.715 | 0.04 |                                                      |       |              |    |
|    |       |      | 1-Ethyl-4-methylcyclohexane                          | 11451 | 003728-56-1  | 46 |
|    |       |      | 1-Ethyl-3-methylcyclohexane (c,t)                    | 11488 | 003728-55-0  | 41 |
|    |       |      | Cyclohexane, 1-ethyl-4-methyl-, trans-               | 11501 | 006236-88-0  | 41 |
| 36 | 7.838 | 0.11 |                                                      |       |              |    |
|    |       |      | Cyclopentane, 1,2,3,4,5-pentamethyl-                 | 17833 | 1000152-79-7 | 64 |
|    |       |      | 2H-Pyran, 3,4-dihydro-                               | 1415  | 000110-87-2  | 59 |
|    |       |      | 3,6,6-Trimethyl-cyclohex-2-enol                      | 18506 | 073741-62-5  | 47 |
| 37 | 7.895 | 0.12 |                                                      |       |              |    |
|    |       |      | Cyclohexane, 1-methyl-4-(1-methyl-4-methyl-), trans- | 17856 | 001678-82-6  | 68 |
|    |       |      | Cyclohexane, 1-methyl-3-propyl-                      | 17809 | 004291-80-9  | 64 |
|    |       |      | 3-Hexene, 3-ethyl-2,5-dimethyl-                      | 17808 | 062338-08-3  | 59 |
| 38 | 7.967 | 0.09 |                                                      |       |              |    |
|    |       |      | Cyclopentane, 1,2,3,4,5-pentamethyl-                 | 17833 | 1000152-79-7 | 50 |
|    |       |      | Furan, 2,3-dihydro-3-methyl-                         | 1438  | 001708-27-6  | 43 |
|    |       |      | 3-Penten-2-one                                       | 1390  | 000625-33-2  | 43 |
| 39 | 8.116 | 0.03 |                                                      |       |              |    |
|    |       |      | Octane, 2,6-dimethyl-                                | 18952 | 002051-30-1  | 93 |
|    |       |      | Octane, 2,6-dimethyl-                                | 18948 | 002051-30-1  | 93 |
|    |       |      | Nonane, 3-methyl-                                    | 18925 | 005911-04-6  | 87 |

|    |       |      |                                                                             |       |              |    |
|----|-------|------|-----------------------------------------------------------------------------|-------|--------------|----|
| 40 | 8.562 | 0.05 | 1H-Pyrazole, 3-ethyl-4,5-dihydro-                                           | 3036  | 005920-29-6  | 43 |
|    |       |      | 2-Pentene, 4,4-dimethyl-, (Z)-                                              | 3373  | 000762-63-0  | 43 |
|    |       |      | 2-Pentene, 3,4-dimethyl-, (Z)-                                              | 3372  | 004914-91-4  | 43 |
| 41 | 8.681 | 0.05 | 1H-Imidazole, 4,5-dihydro-2,4-dimethyl-                                     | 3046  | 000930-61-0  | 38 |
|    |       |      | 2-Pentene, 4,4-dimethyl-                                                    | 3325  | 026232-98-4  | 38 |
|    |       |      | Octane, 2,3-dimethyl-                                                       | 18946 | 007146-60-3  | 38 |
| 42 | 8.747 | 0.02 | 2,4-Dimethyl-3-hexene(c,t)                                                  | 6669  | 1000118-16-4 | 46 |
|    |       |      | 2-Pentene, 3-ethyl-2-methyl-                                                | 6708  | 019780-67-7  | 43 |
|    |       |      | Cyclohexane, (1,2-dimethylbutyl)-                                           | 36064 | 061142-37-8  | 43 |
| 43 | 9.425 | 0.04 | 2-Pentene, 4,4-dimethyl-, (E)-                                              | 3374  | 000690-08-4  | 52 |
|    |       |      | 2-Pentene, 4,4-dimethyl-                                                    | 3325  | 026232-98-4  | 50 |
|    |       |      | 2-Pentene, 3,4-dimethyl-, (E)-                                              | 3376  | 004914-92-5  | 50 |
| 44 | 9.559 | 0.14 | 2,2,4-Trimethyl-3-hexene                                                    | 11429 | 059643-72-0  | 46 |
|    |       |      | 3-Heptene, 2,2,3,5,6-pentamethyl-                                           | 36065 | 116164-06-8  | 43 |
|    |       |      | 4-Nonene, 2,3,3-trimethyl-, (Z)-                                            | 36060 | 063830-68-2  | 38 |
| 45 | 9.610 | 0.05 | cis,cis,cis-1-Isobutyl-2,5-dimethylcyclohexane                              | 36080 | 1000113-60-0 | 74 |
|    |       |      | Cyclohexane, 1,1,3-trimethyl-                                               | 11476 | 003073-66-3  | 64 |
|    |       |      | Cyclohexane, 1,4-dimethyl-2-(2-methylpropyl)-, (1.alpha.,2.beta.,5.alpha.)- | 36083 | 054411-17-5  | 64 |
| 46 | 9.651 | 0.02 | Barbituric acid                                                             | 11859 | 000067-52-7  | 53 |
|    |       |      | 2-Pyrrolidinone                                                             | 1535  | 000616-45-5  | 50 |
|    |       |      | 1,3-Butadiene, 1-[(1-methylethyl)thio]-, (E)-                               | 12225 | 088017-34-9  | 46 |
| 47 | 9.708 | 0.01 | 3-Isopropyl-5-methyl-hex-4-en-2-one                                         | 26309 | 077142-85-9  | 43 |
|    |       |      | 1,1,4-Trimethylcyclohexane                                                  | 11449 | 007094-27-1  | 43 |
|    |       |      | p-Fluoroaniline                                                             | 6040  | 000371-40-4  | 35 |

|    |        |      |                                                              |        |              |    |
|----|--------|------|--------------------------------------------------------------|--------|--------------|----|
| 48 | 9.846  | 0.01 | 2,2-Dimethylvaleric acid                                     | 13300  | 001185-39-3  | 47 |
|    |        |      | Malonic acid, 3-methylpentyl nonyl ester                     | 147276 | 1000348-28-3 | 47 |
|    |        |      | Pentanoic acid, 6-ethyl-3-octyl ester                        | 91860  | 1000282-73-6 | 43 |
| 49 | 10.031 | 0.03 | Hept-2-ene, 2,4,4,6-tetramethyl-1-(Trimethylsilyl)-1-propyne | 26616  | 103982-58-7  | 59 |
|    |        |      |                                                              | 6276   | 006224-91-5  | 52 |
|    |        |      | Cyclohexane, 1,3-dimethyl-, cis-                             | 6745   | 000638-04-0  | 50 |
| 50 | 10.129 | 0.07 | 3-Hexene, 2,3-dimethyl-                                      | 6643   | 007145-23-5  | 64 |
|    |        |      | 3-Hexene, 2,3-dimethyl-                                      | 6657   | 007145-23-5  | 59 |
|    |        |      | 2,4-Dimethyl-3-hexene(c,t)                                   | 6669   | 1000118-16-4 | 45 |
| 51 | 10.283 | 0.03 | 3-Heptene, 2,2,3,5,6-pentamethyl-                            | 36065  | 116164-06-8  | 76 |
|    |        |      | Cyclohexane, 3-ethyl-5-methyl-1-propyl-                      | 36076  | 1000151-39-5 | 47 |
|    |        |      | 2-Pentene, 4-methyl-, (Z)-                                   | 1510   | 000691-38-3  | 46 |
| 52 | 10.755 | 0.05 | Cyclohexane, 1,2-dimethyl-, cis-                             | 6740   | 002207-01-4  | 49 |
|    |        |      | 6-Dodecene, (E)-                                             | 35951  | 007206-17-9  | 46 |
|    |        |      | Cyclohexane, 1,2-dimethyl-, cis-                             | 6736   | 002207-01-4  | 46 |
| 53 | 13.302 | 2.31 | Propyl aldoxime, 2-methyl-, anti-                            | 1892   | 005775-73-5  | 27 |
|    |        |      | 2,5-Cyclohexadien-1-one, 3,5-dihydroxy-4,4-dimethyl-         | 26970  | 002065-00-1  | 27 |
|    |        |      | 2-Chloro-5-methoxypyrimidine                                 | 20240  | 022536-65-8  | 22 |
| 54 | 13.395 | 0.90 | Propyl aldoxime, 2-methyl-, syn-                             | 1891   | 005780-39-2  | 16 |
|    |        |      | 1-Oxa-3,4-diazacyclopentadiene                               | 494    | 000288-99-3  | 16 |
|    |        |      | Valine, N-methyl-N-methoxycarbonyl-, octadecyl ester         | 205820 | 1000328-94-5 | 14 |
| 55 | 13.919 | 1.08 | Azetidine, n-propyl-                                         | 3511   |              | 39 |
|    |        |      | Cyclohexanamine, N-methyl-N-nitros                           | 19293  | 005432-28-0  | 38 |

|    |        |      |                                                                                          |        |              |    |
|----|--------|------|------------------------------------------------------------------------------------------|--------|--------------|----|
|    |        |      | o-<br>4-(Pyrrolidin-2-ylcarbonyl)morphol<br>ine                                          | 48074  | 1000305-37-7 | 9  |
| 56 | 15.120 | 0.00 |                                                                                          |        |              |    |
|    |        |      | 1-Methoxy-2,3-cis-dimethylaziridin<br>e (sin)                                            | 4101   | 061593-25-7  | 47 |
|    |        |      | Benzeneethanamine, N-(1-methylethy<br>lidene)-                                           | 30994  | 010433-34-8  | 35 |
|    |        |      | (4-Oxo-6-phenyl-3,4(2H)-[1,3]oxazi<br>n-3-yl)-acetic acid                                | 84639  | 1000296-19-7 | 23 |
| 57 | 18.571 | 2.59 |                                                                                          |        |              |    |
|    |        |      | Azetidine, n-propyl-                                                                     | 3511   |              | 16 |
|    |        |      | Phosphine oxide, methyldiphenyl-                                                         | 71649  | 002129-89-7  | 12 |
|    |        |      | 1-Methoxy-2,3-cis-dimethylaziridin<br>e (sin)                                            | 4101   | 061593-25-7  | 12 |
| 58 | 18.643 | 0.11 |                                                                                          |        |              |    |
|    |        |      | Decyl alcohol, tert-butyldimethyls<br>ilyl ether                                         | 115281 | 1000333-00-5 | 22 |
|    |        |      | Azetidine, n-propyl-                                                                     | 3511   |              | 16 |
|    |        |      | 1-Methoxy-2,3-cis-dimethylaziridin<br>e (sin)                                            | 4101   | 061593-25-7  | 12 |
| 59 | 19.295 | 1.94 |                                                                                          |        |              |    |
|    |        |      | Nonanoic acid, tert-butyldimethyls<br>ilyl ester                                         | 115100 | 104255-73-4  | 14 |
|    |        |      | (S)-(+)-2-Pyrrolidinemethanol                                                            | 4078   | 023356-96-9  | 10 |
|    |        |      | (R)-(-)-2-Pyrrolidinemethanol                                                            | 4079   | 068832-13-3  | 10 |
| 60 | 22.094 | 0.30 |                                                                                          |        |              |    |
|    |        |      | 1-Methoxy-2,3-cis-dimethylaziridin<br>e (sin)                                            | 4101   | 061593-25-7  | 17 |
|    |        |      | N,N'-di-2-Naphthyl-p-phenylenediam<br>ine                                                | 177646 | 000093-46-9  | 14 |
|    |        |      | 2,4-Dinitro-11-phenyl-5H-dibenzo[b<br>,E][1,4]diazepine                                  | 177244 | 071354-26-2  | 12 |
| 61 | 22.510 | 0.16 |                                                                                          |        |              |    |
|    |        |      | 3-Amino-6-nitro-4-phenylsulfanyl-b<br>enzo[b]thiophene-2-carboxylic acid<br>methyl ester | 177075 | 1000275-36-3 | 32 |
|    |        |      | Benzoic acid, 4-(3,4-dihydro-2,4-d                                                       | 177893 | 317326-96-8  | 27 |

|    |        |      |                                                                                               |        |              |    |
|----|--------|------|-----------------------------------------------------------------------------------------------|--------|--------------|----|
|    |        |      | ioxo-2H-pyrimido[4,5-b]quinolin-10-yl)-, ethyl ester                                          |        |              |    |
|    |        |      | 1-Methoxy-2,3-cis-dimethylaziridine (sin)                                                     | 4101   | 061593-25-7  | 25 |
| 62 | 22.664 | 0.39 |                                                                                               |        |              |    |
|    |        |      | 3-Amino-6-nitro-4-phenylsulfanylbenzo[b]thiophene-2-carboxylic acid methyl ester              | 177075 | 1000275-36-3 | 38 |
|    |        |      | 2-Quinolinecarboxylic acid, 4-[(tert-butyl)dimethylsilyloxy]-, tert-butyl)dimethylsilyl ester | 200507 | 1000221-71-1 | 17 |
|    |        |      | Thianthrene, octafluoro-                                                                      | 176996 | 016012-83-2  | 16 |
| 63 | 22.813 | 0.63 |                                                                                               |        |              |    |
|    |        |      | Thianthrene, octafluoro-                                                                      | 176996 | 016012-83-2  | 35 |
|    |        |      | 2-Quinolinecarboxylic acid, 4-[(tert-butyl)dimethylsilyloxy]-, tert-butyl)dimethylsilyl ester | 200507 | 1000221-71-1 | 23 |
|    |        |      | 5.alpha.-Pregnane-12,20-dione, cyclic 12-(ethylene acetal)                                    | 177585 | 005618-27-9  | 9  |
| 64 | 22.941 | 0.44 |                                                                                               |        |              |    |
|    |        |      | Thianthrene, octafluoro-                                                                      | 176996 | 016012-83-2  | 25 |
|    |        |      | 2-Quinolinecarboxylic acid, 4-[(tert-butyl)dimethylsilyloxy]-, tert-butyl)dimethylsilyl ester | 200507 | 1000221-71-1 | 23 |
|    |        |      | Bis-(4-(2,5-dioxo-2,5-dihydropyrroli-1-yl)-phenyl)-ether                                      | 177291 | 013132-94-0  | 9  |
